# Supplementary material
Source: PubMed Central journal article supplement (PMC10429932)

# The Sulfonadyns: a class of aryl sulfonamides inhibiting dynamin I GTPase and clathrin mediated endocytosis are anti-seizure in animal models

Luke R. Odell,<sup>a†,ψ</sup> Nigel C Jones,<sup>b,c,d,ψ</sup> Ngoc Chau,<sup>e</sup> Mark J. Robertson,<sup>a‡</sup> Joseph I. Ambrus,<sup>a</sup> Fiona M. Deane,<sup>a</sup> Kelly A. Young,<sup>a</sup> Ainslie Whiting,<sup>e</sup> Jing Xue,<sup>e</sup> Kate Prichard,<sup>a</sup> James A. Daniel,<sup>e</sup> Nick N. Gorgani,<sup>e</sup> Terence J O'Brien,<sup>c,d</sup> Phillip J. Robinson<sup>e\*</sup> and Adam McCluskey<sup>a\*</sup>

<sup>1</sup> Chemistry, Centre for Chemical Biology, School of Environmental & Life Science, The University of Newcastle, University Drive, Callaghan, NSW 2308, Australia. E-mail: [Adam.McCluskey@newcastle.edu.au](mailto:Adam.McCluskey@newcastle.edu.au); phone +612-4921-6486; Fax +612-4921-5472

<sup>2</sup> Department of Neuroscience, Central Clinical School, Monash University, Melbourne, Victoria 3004, Australia;

<sup>3</sup> Department of Neurology, The Alfred Hospital, Commercial Road, Melbourne, Victoria, Victoria 3004, Australia;

<sup>4</sup> Department of Medicine (Royal Melbourne Hospital), University of Melbourne, Parkville, Victoria 3052, Australia;

<sup>5</sup> Cell Signaling Unit, Children's Medical Research Institute, The University of Sydney, 214 Hawkesbury Road, Westmead, NSW 2145, Australia. E-mail: [PRobinson@cmri.org.au](mailto:PRobinson@cmri.org.au); phone +612-8865-2842;

<sup>†</sup>Current address: Organic Pharmaceutical Chemistry, Department of Medicinal Chemistry, Uppsala Biomedical Centre, Uppsala University, Box 574, SE-751 23 Uppsala, Sweden. Fax: +46 18 471-4474; Tel: +46 18 471-4667;

<sup>‡</sup> Chemistry, Collage of Science and Engineering, James Cook University, Townsville Queensland 4811, Australia.

## Electronic Supporting Information

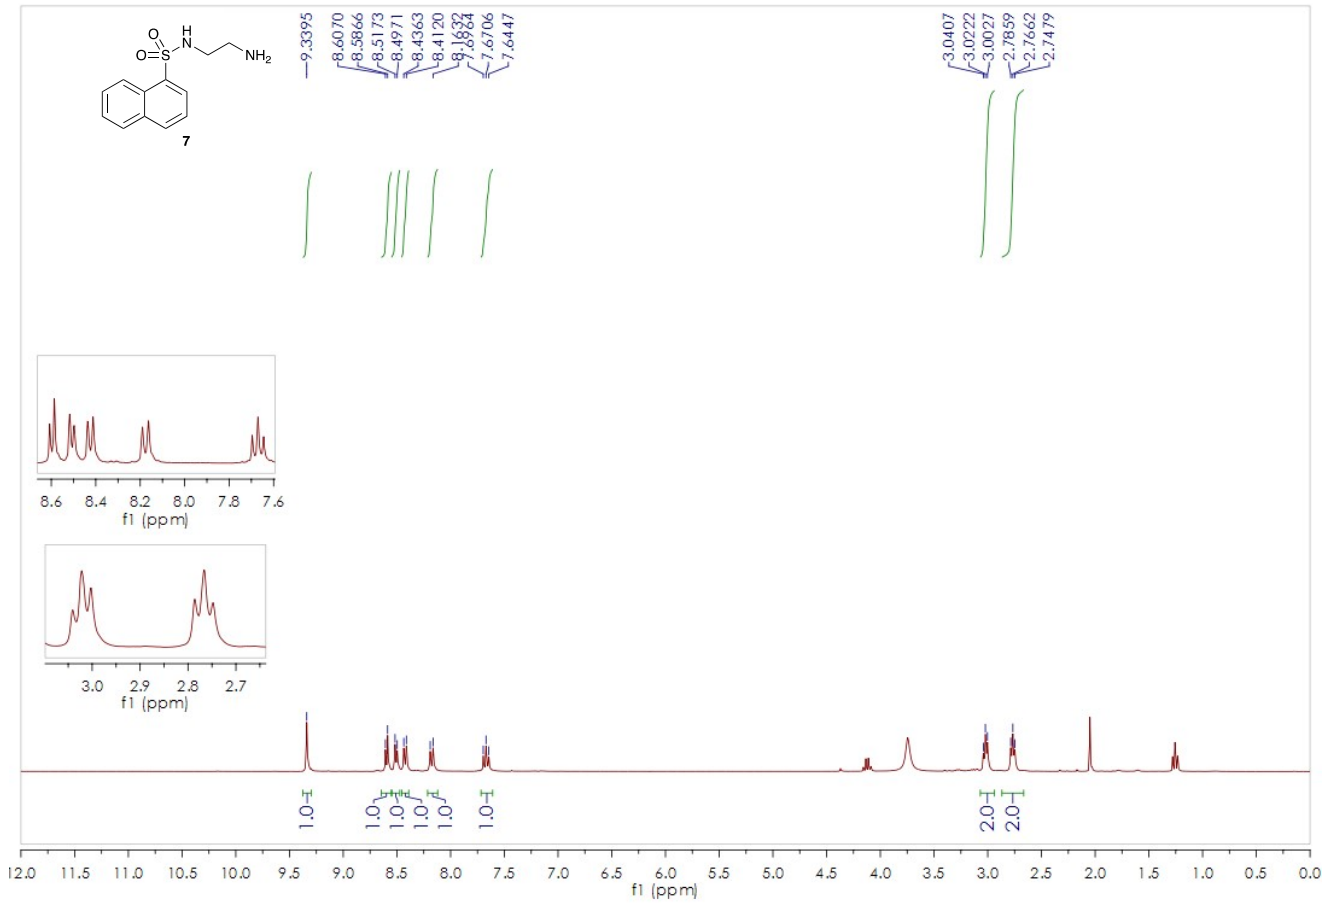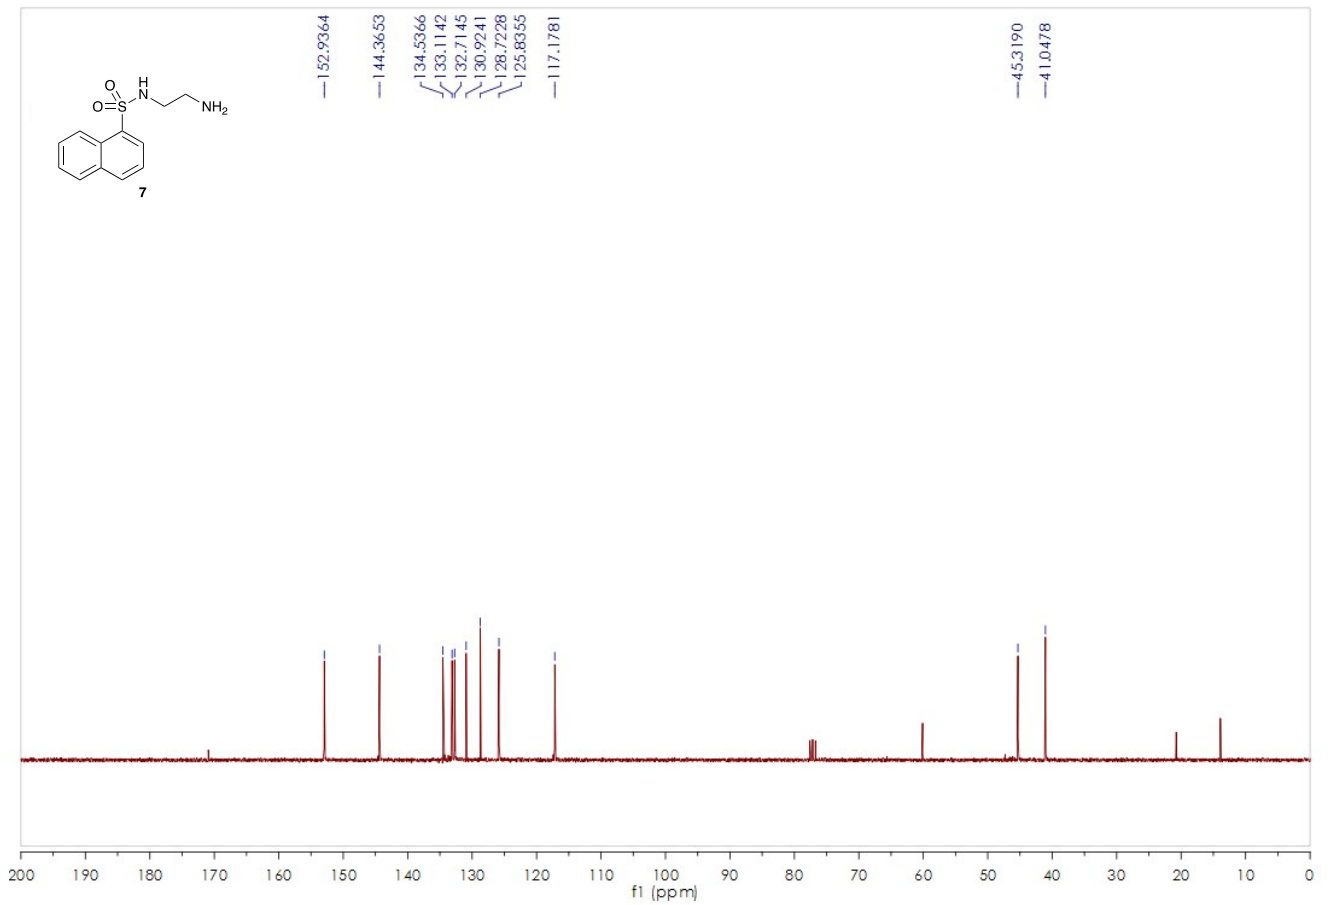

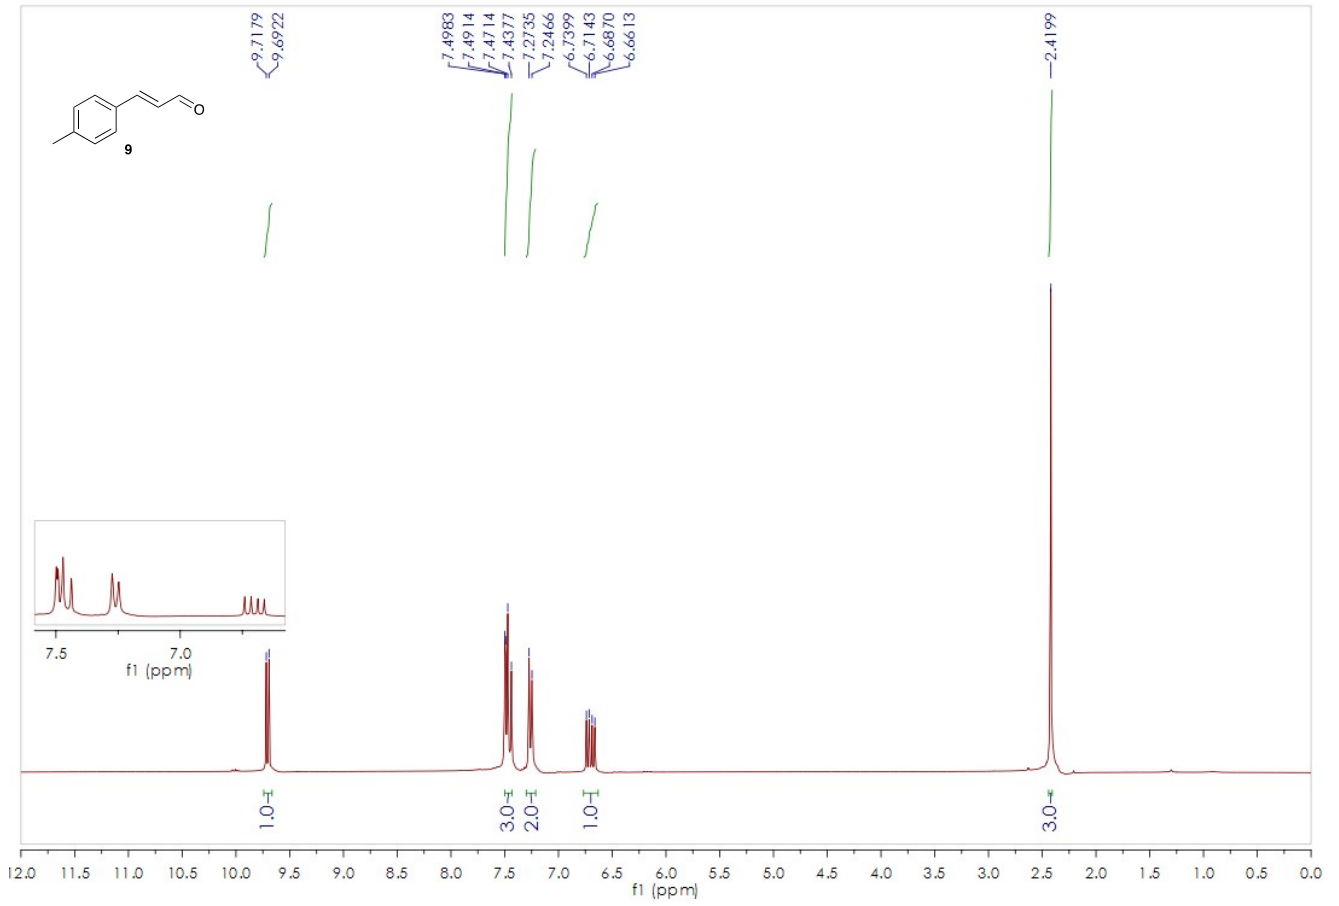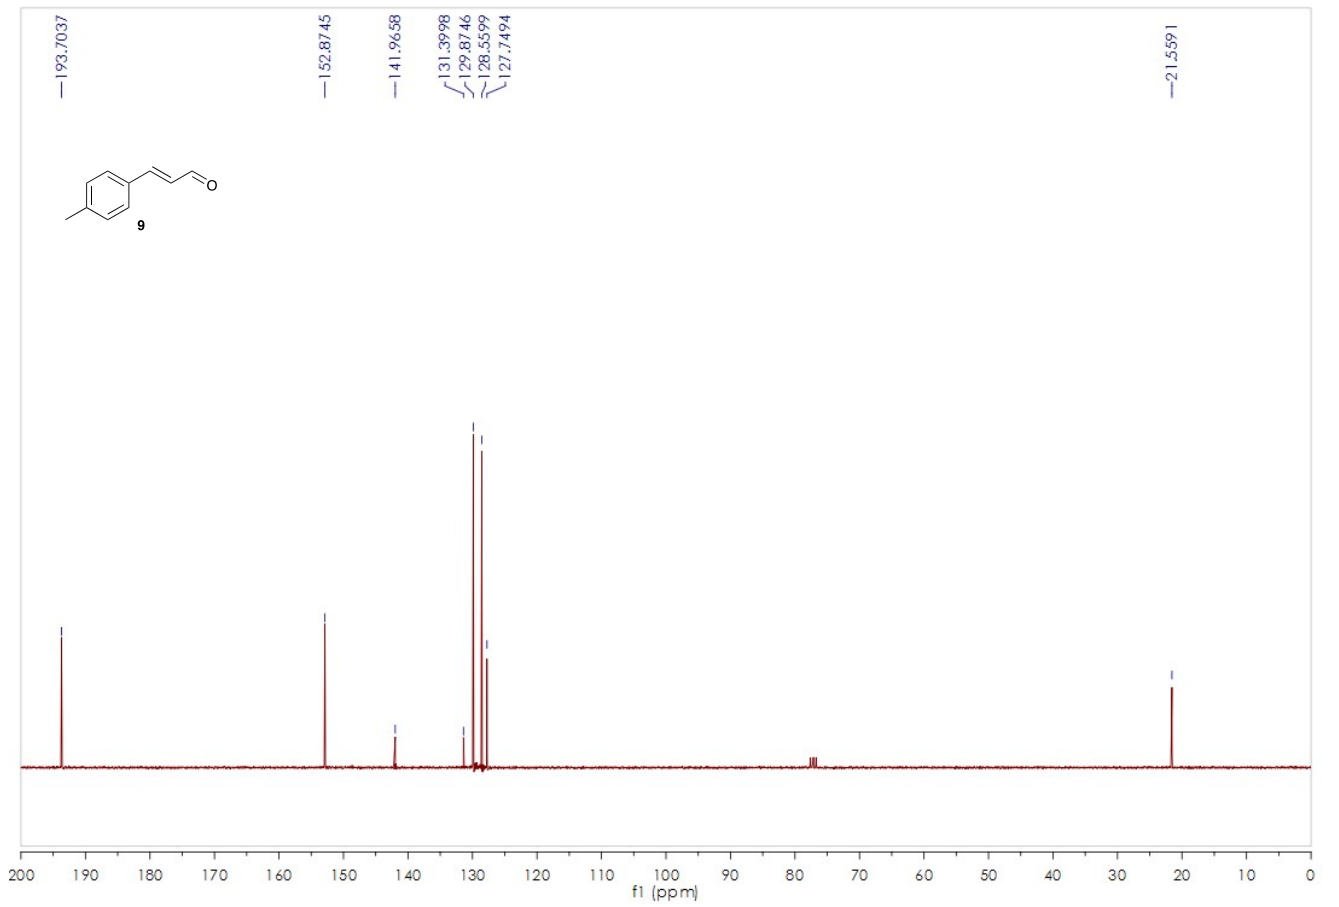

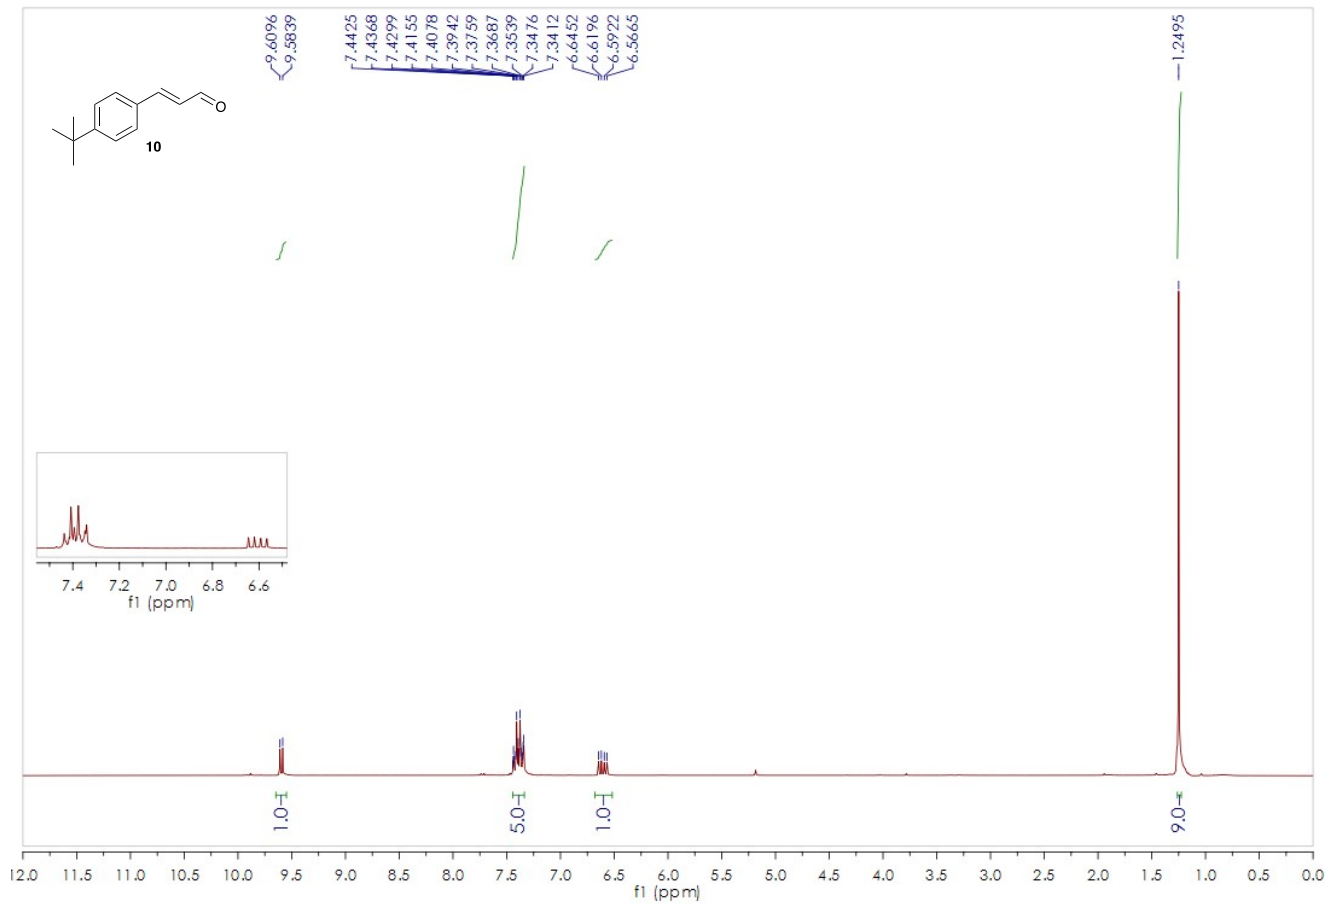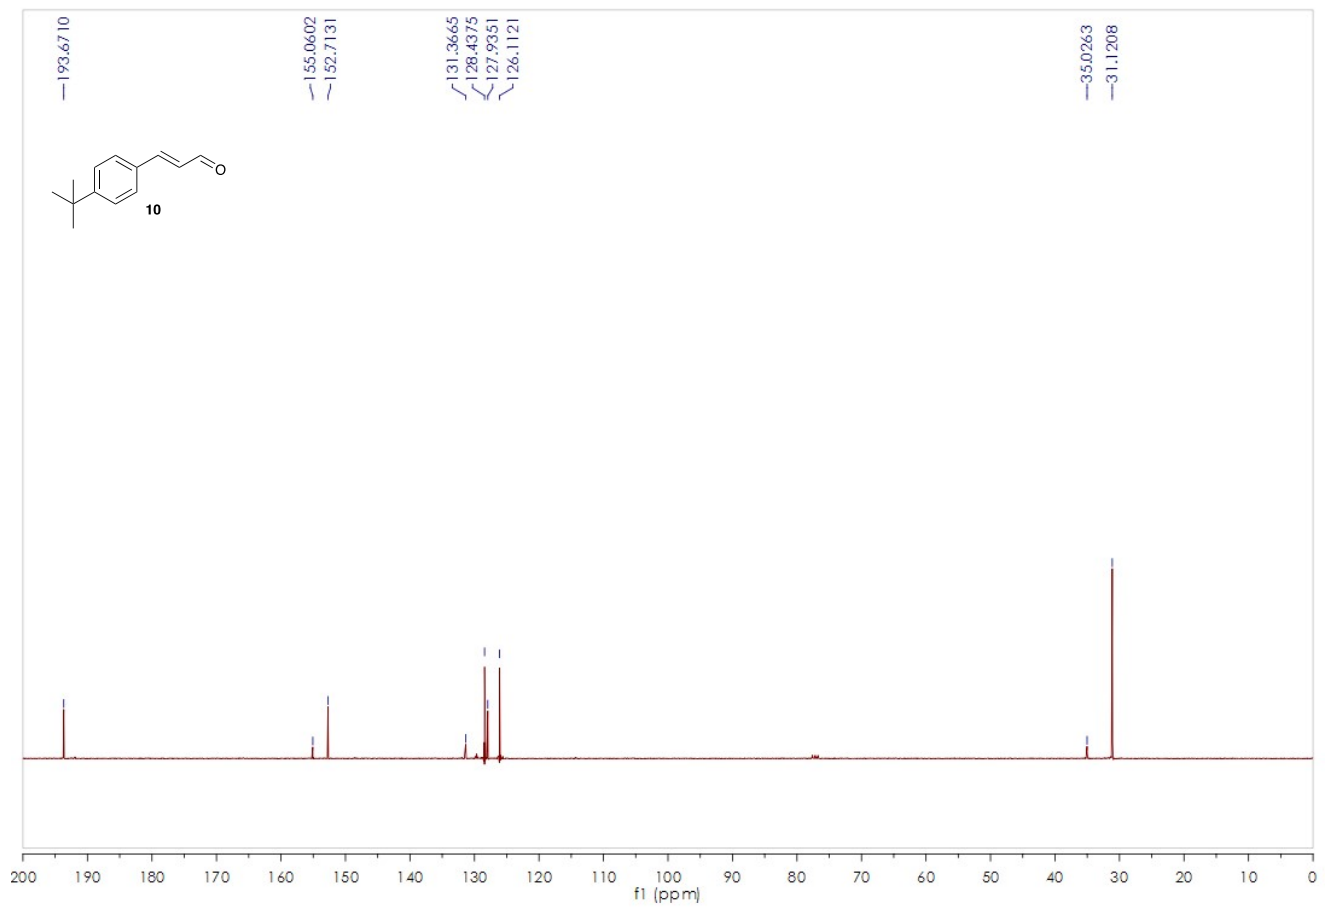



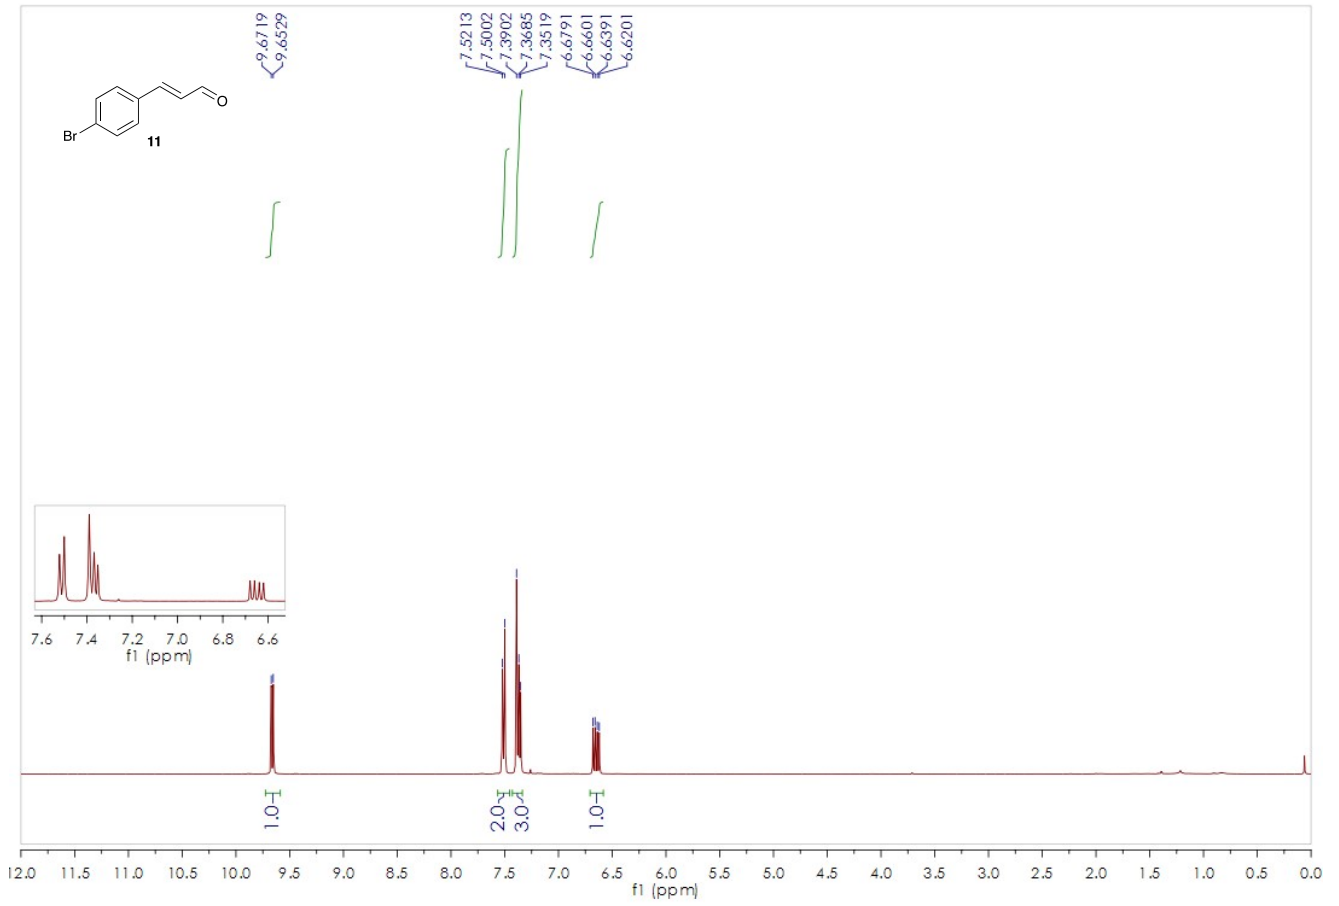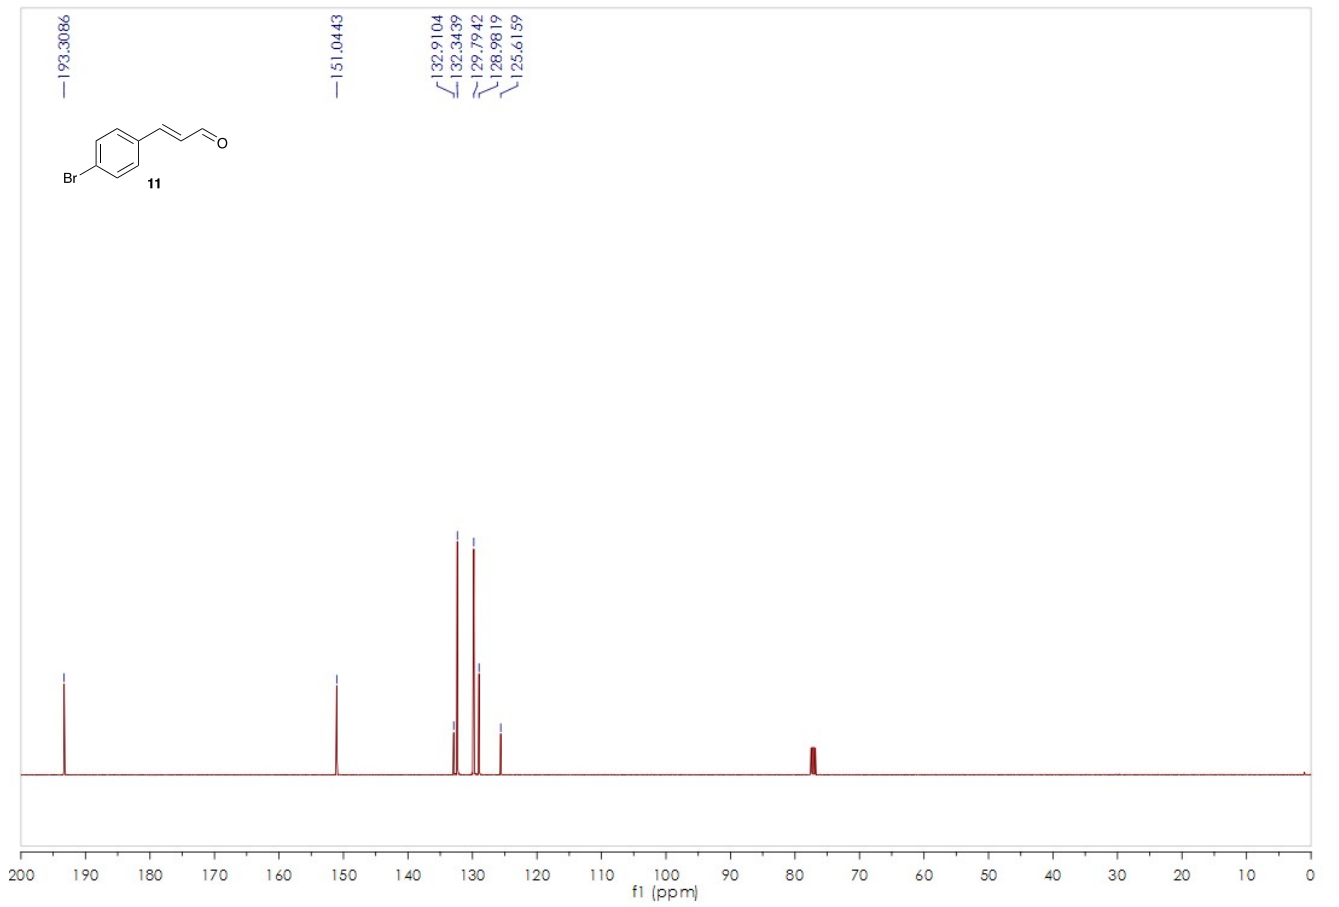

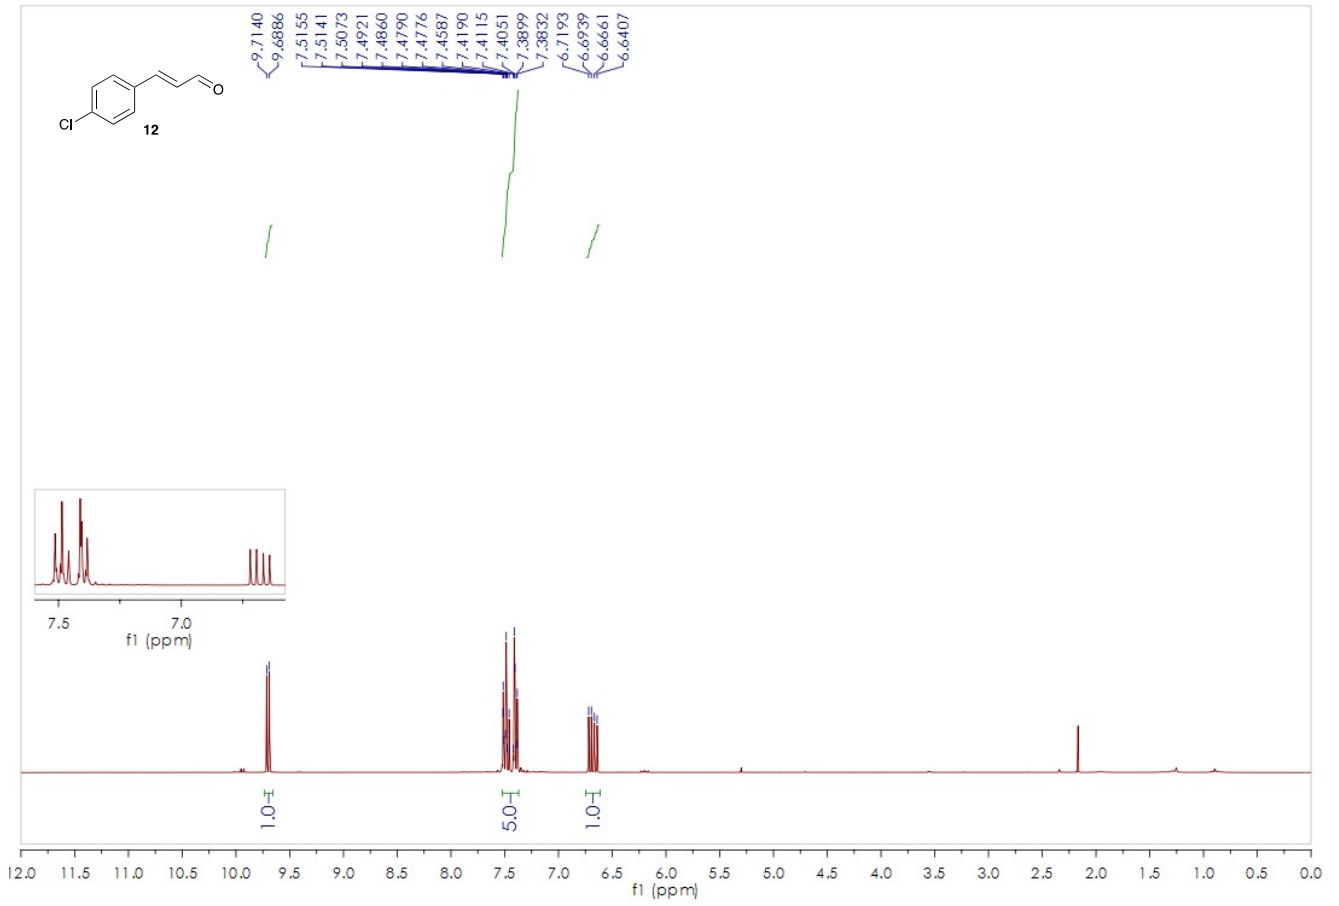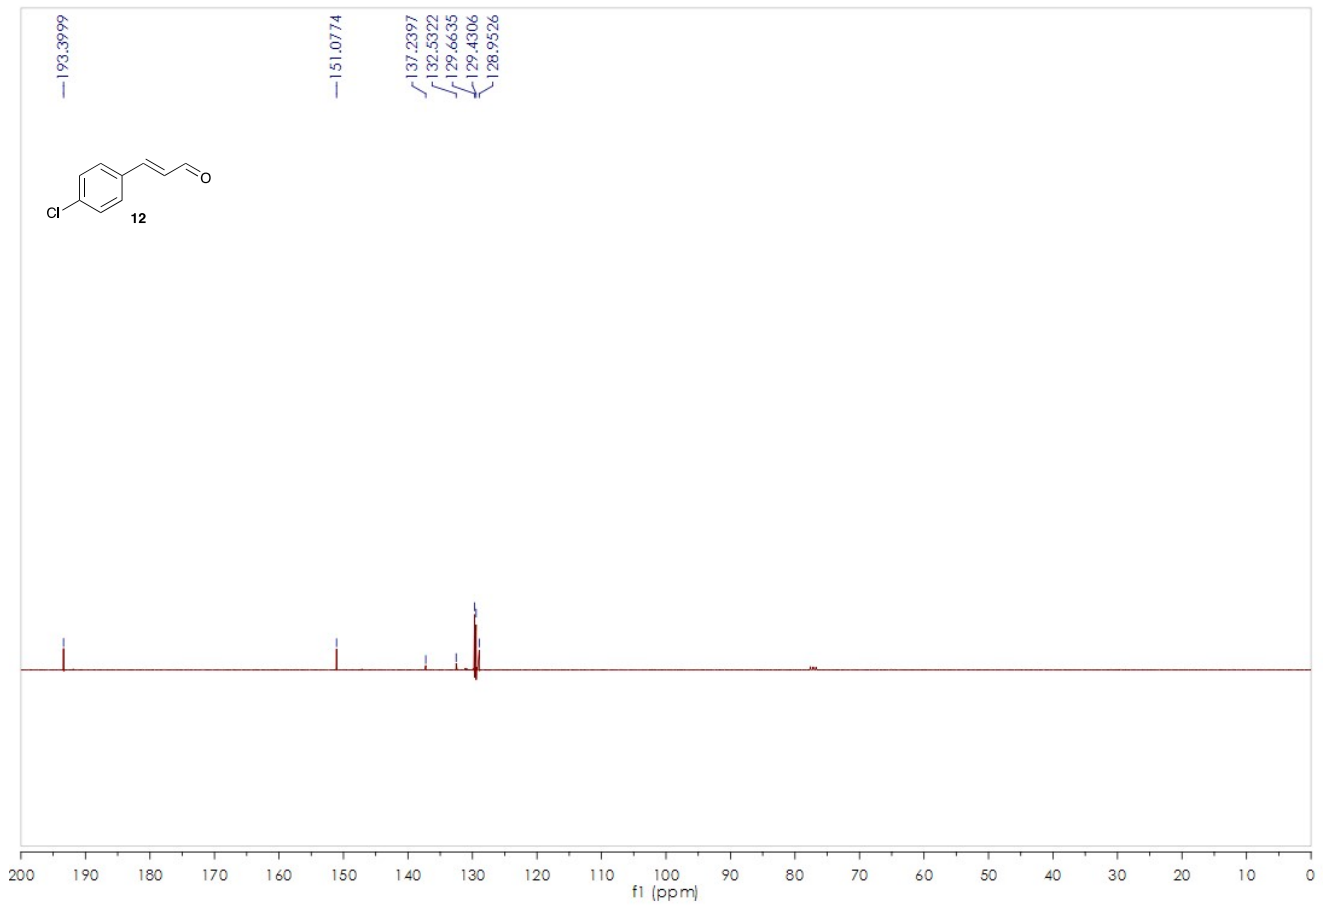

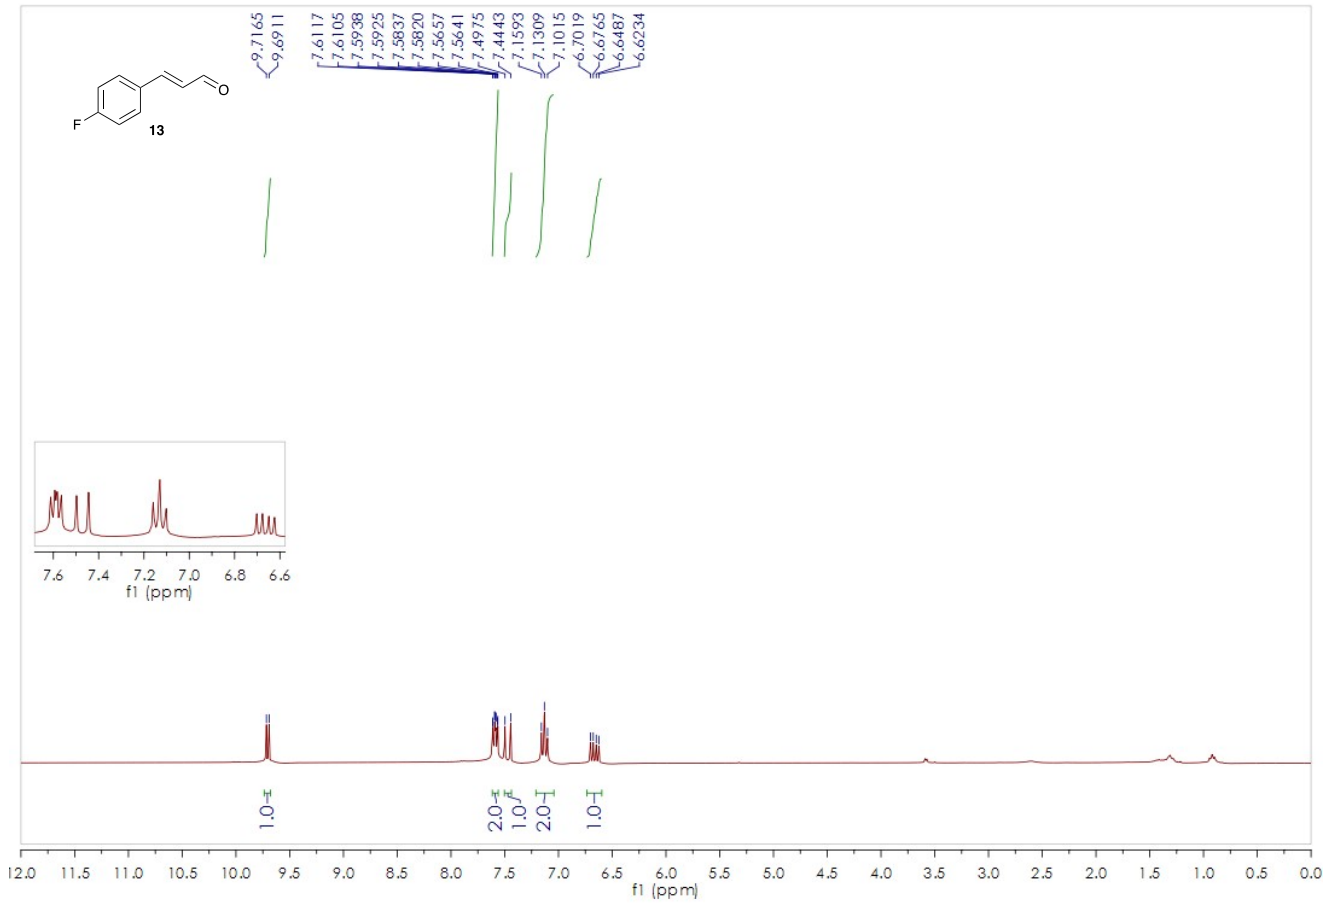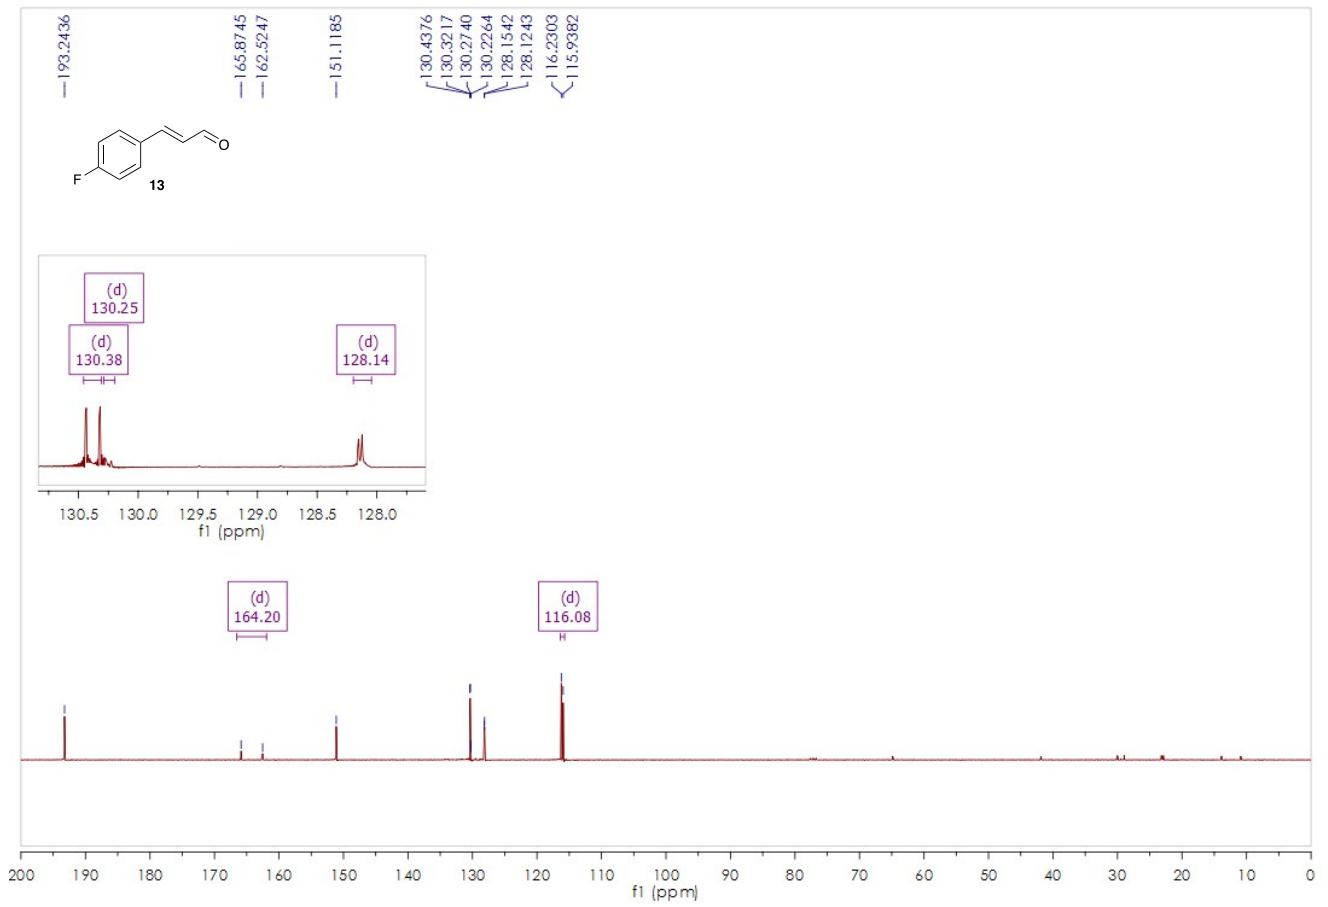

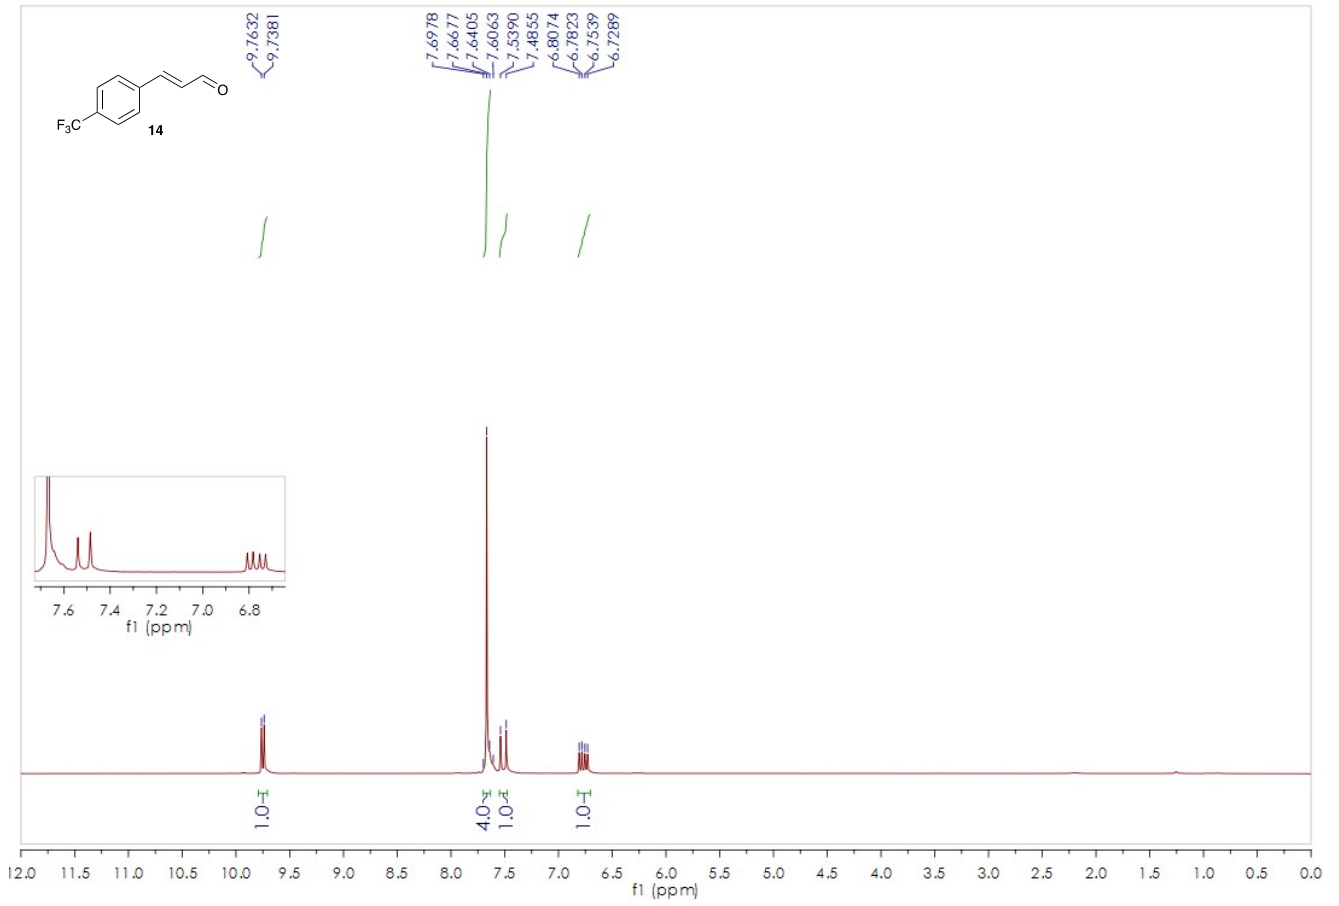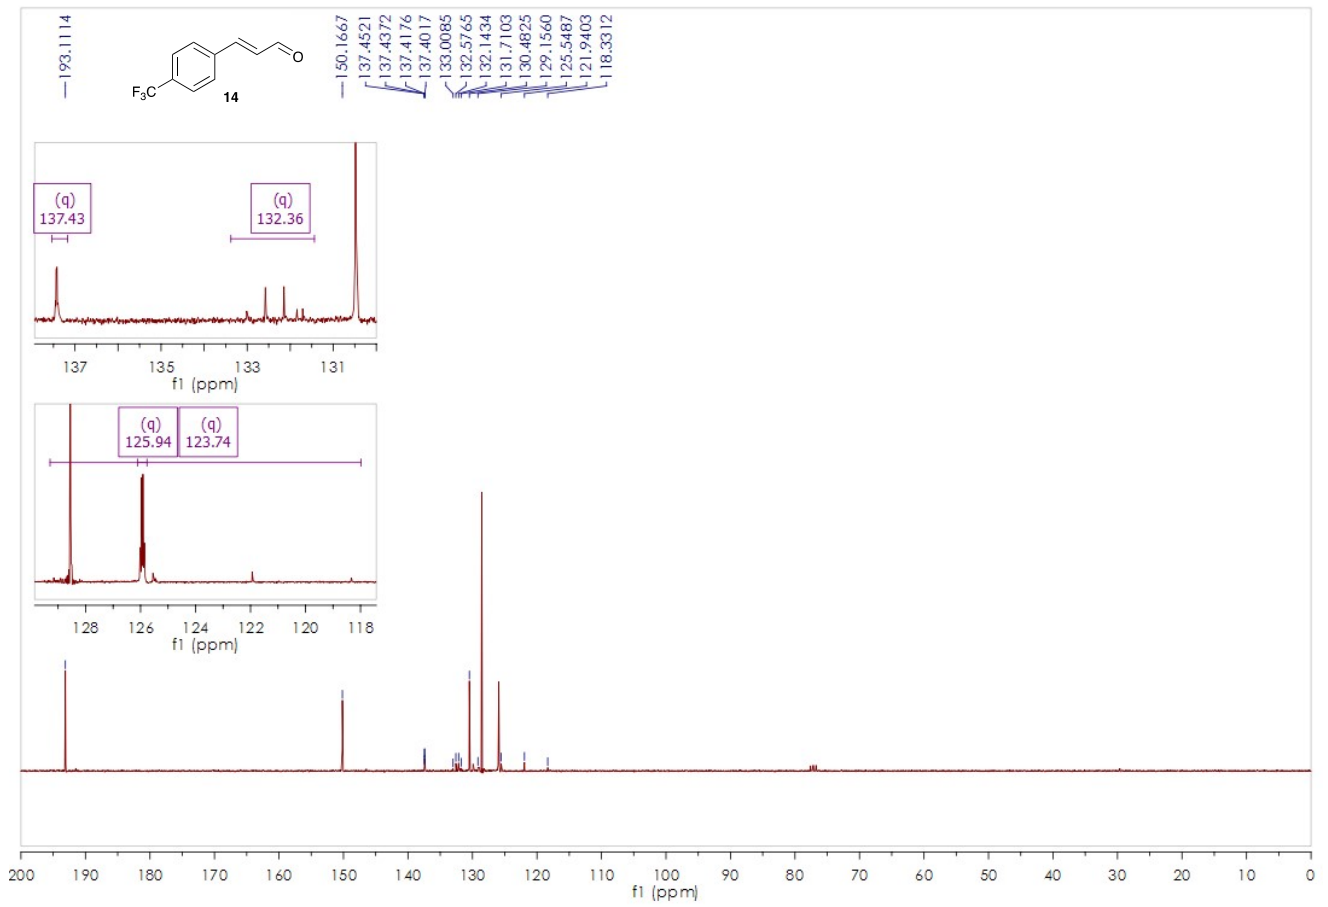

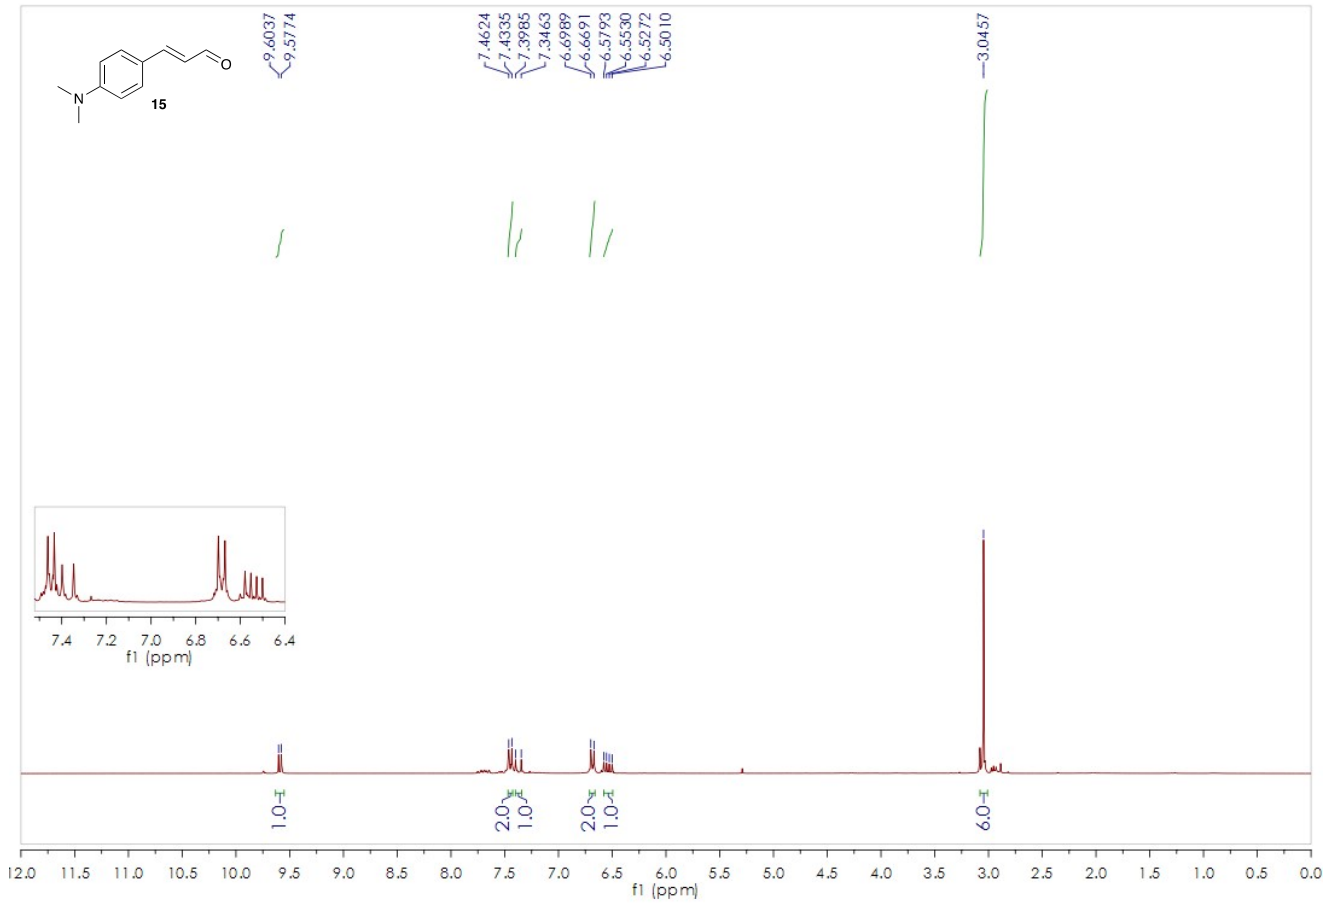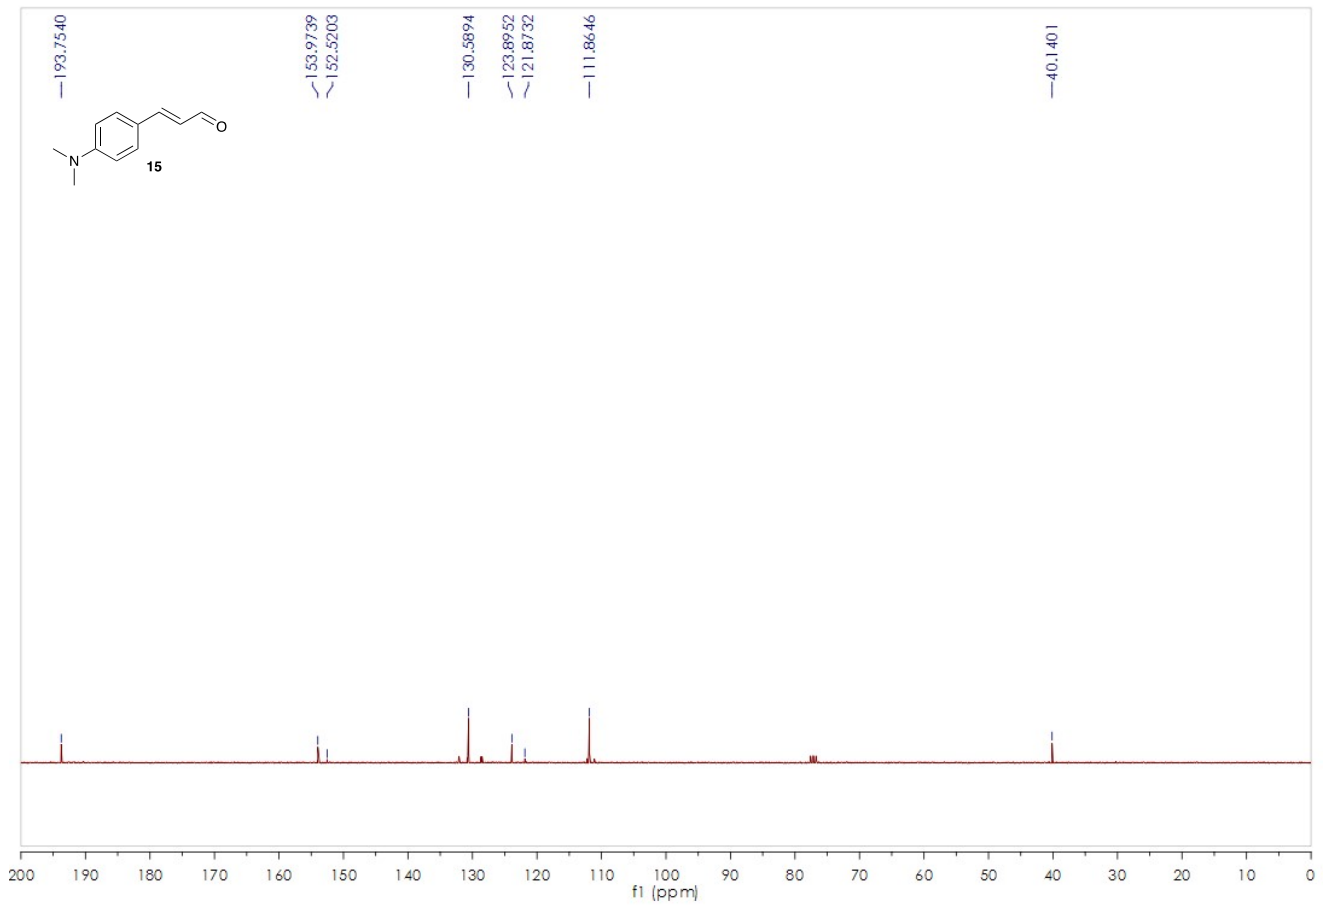

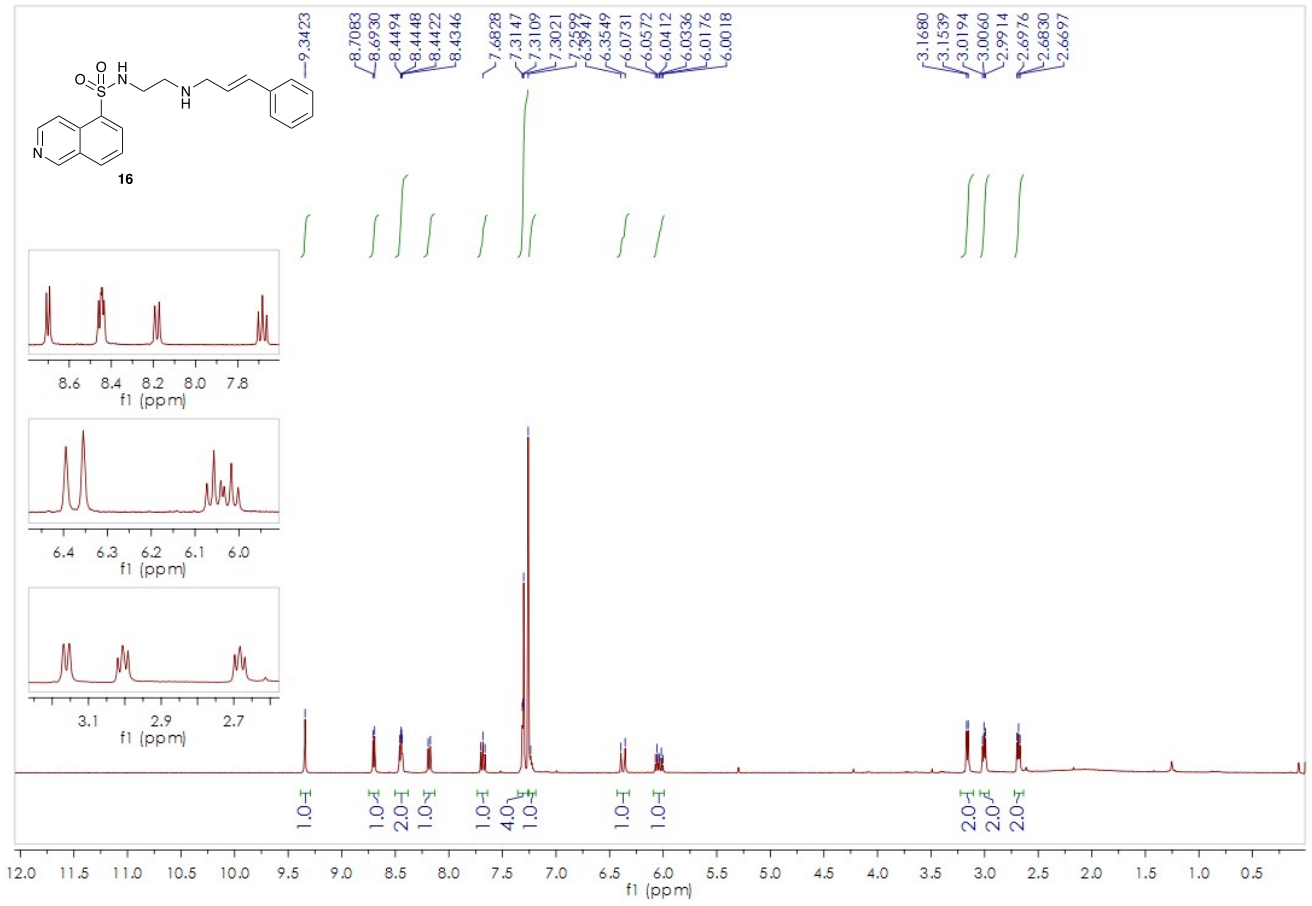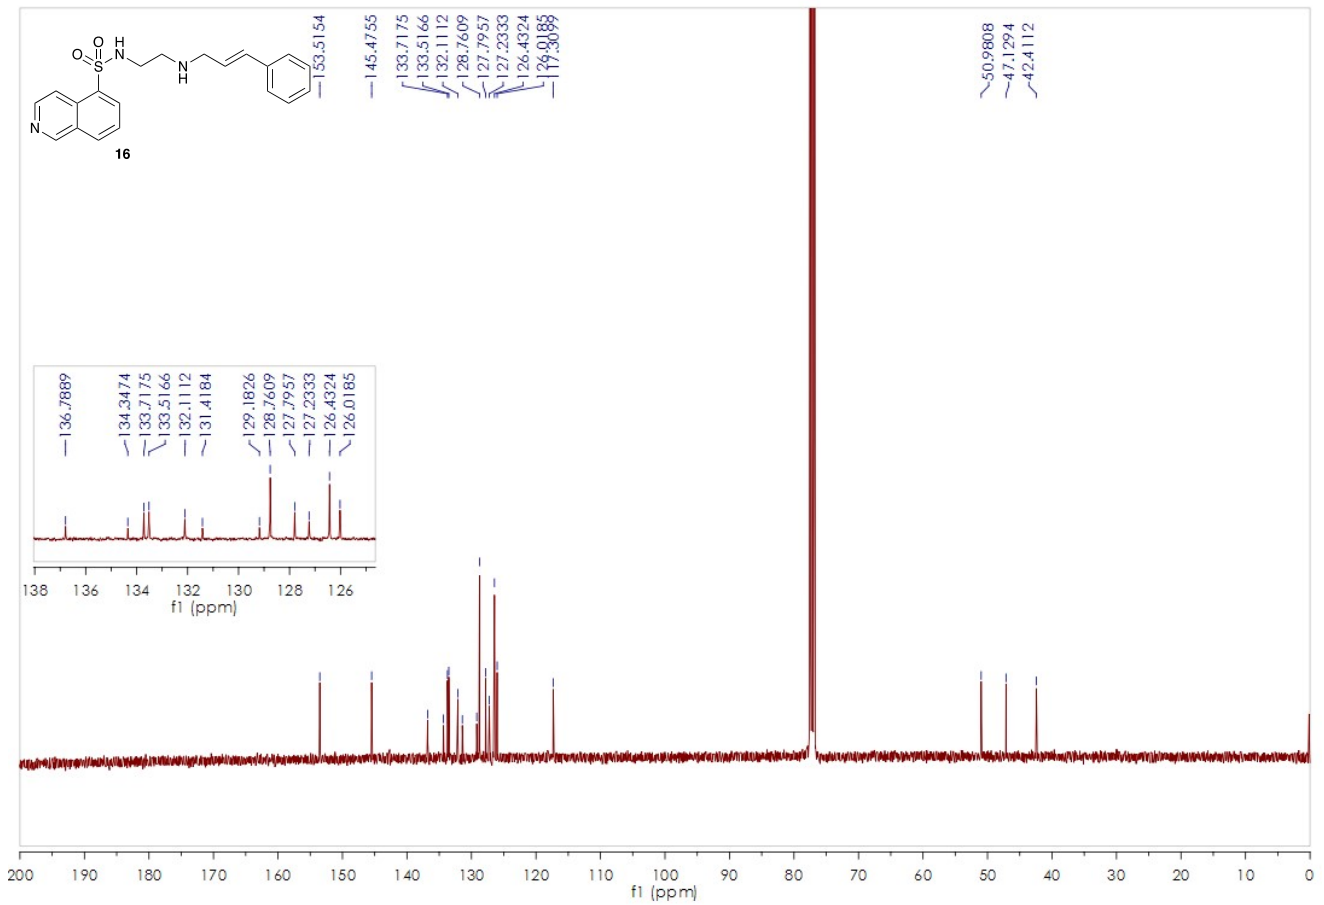

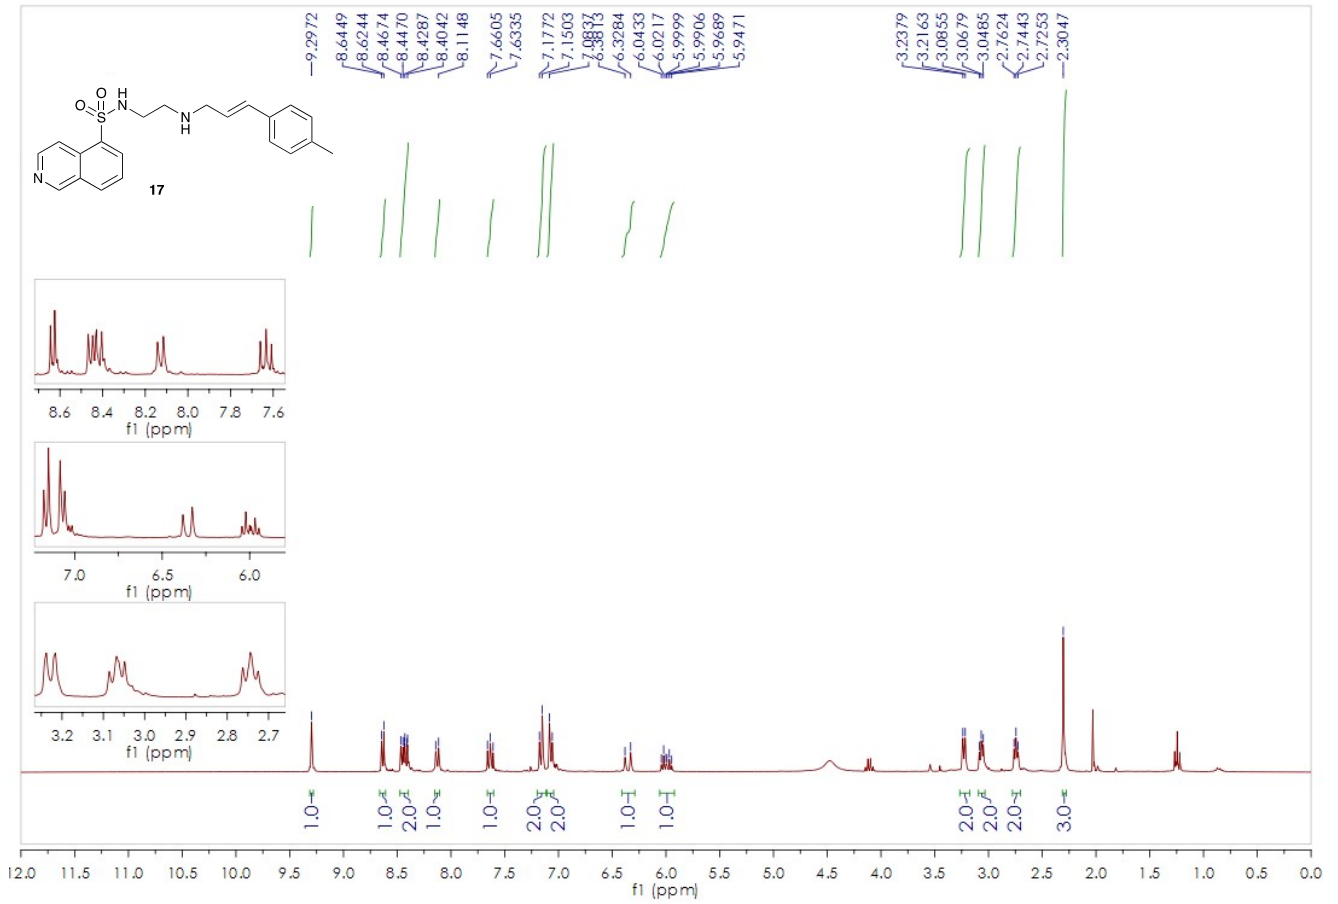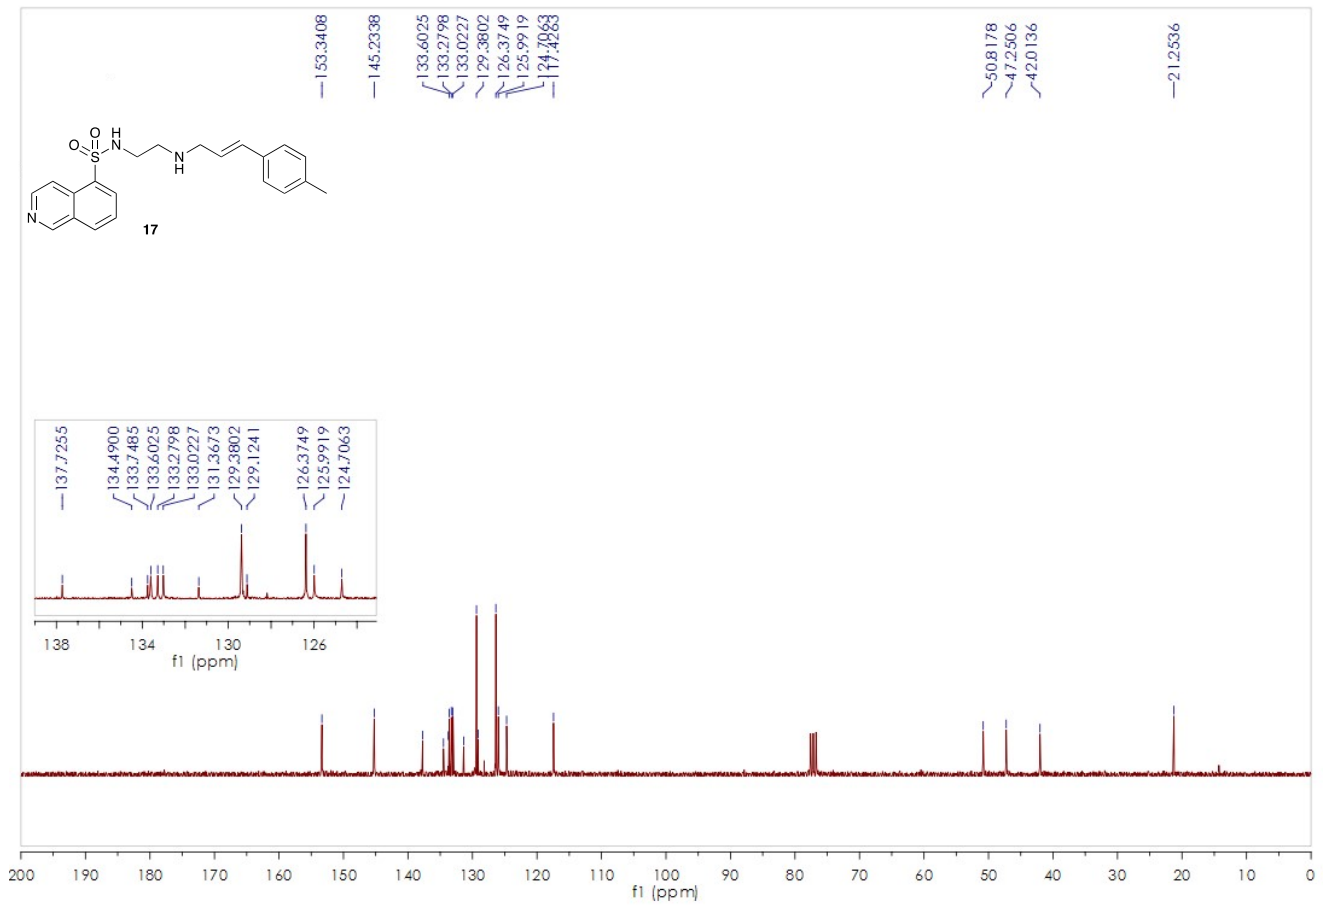

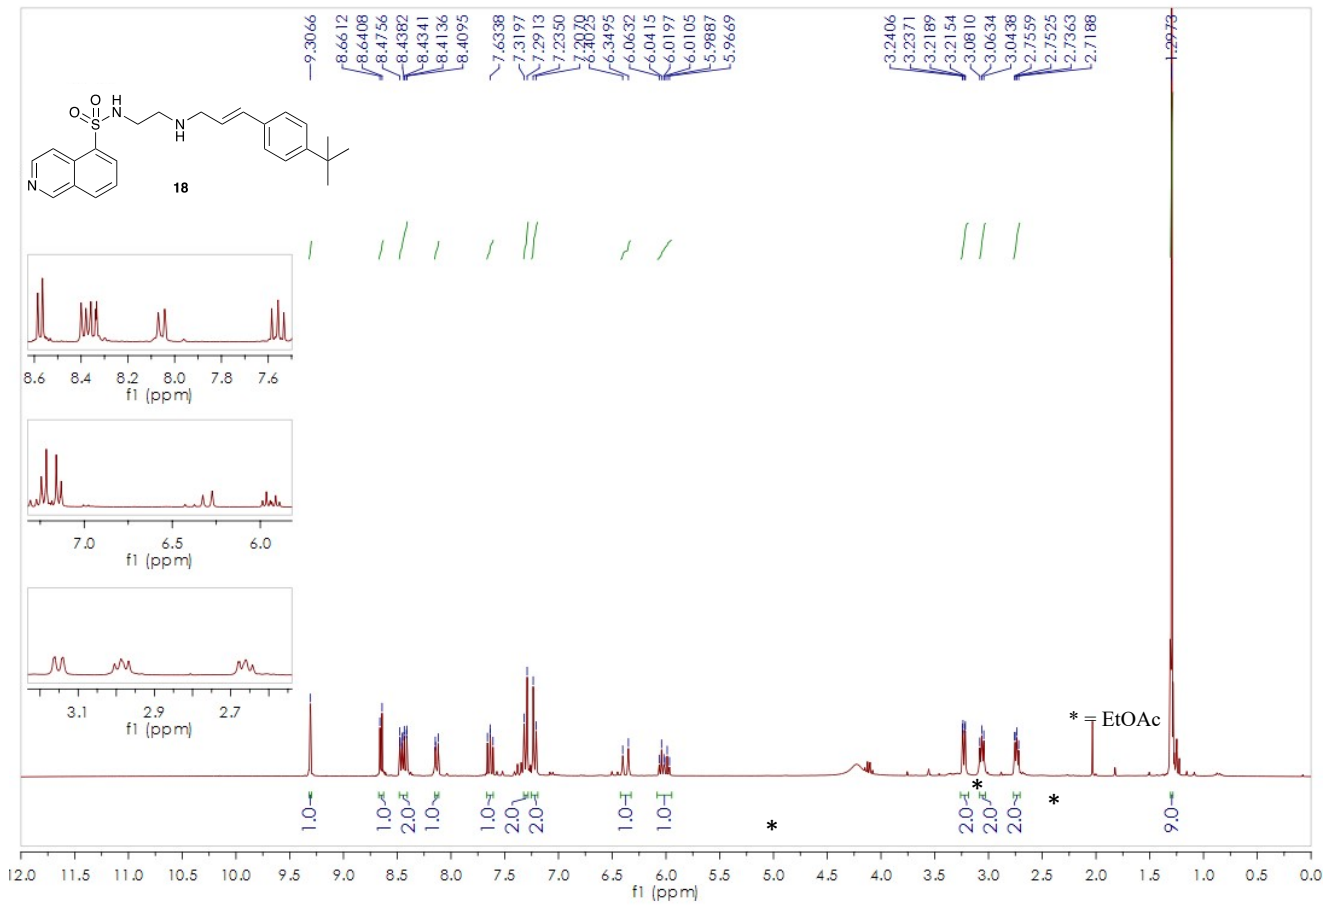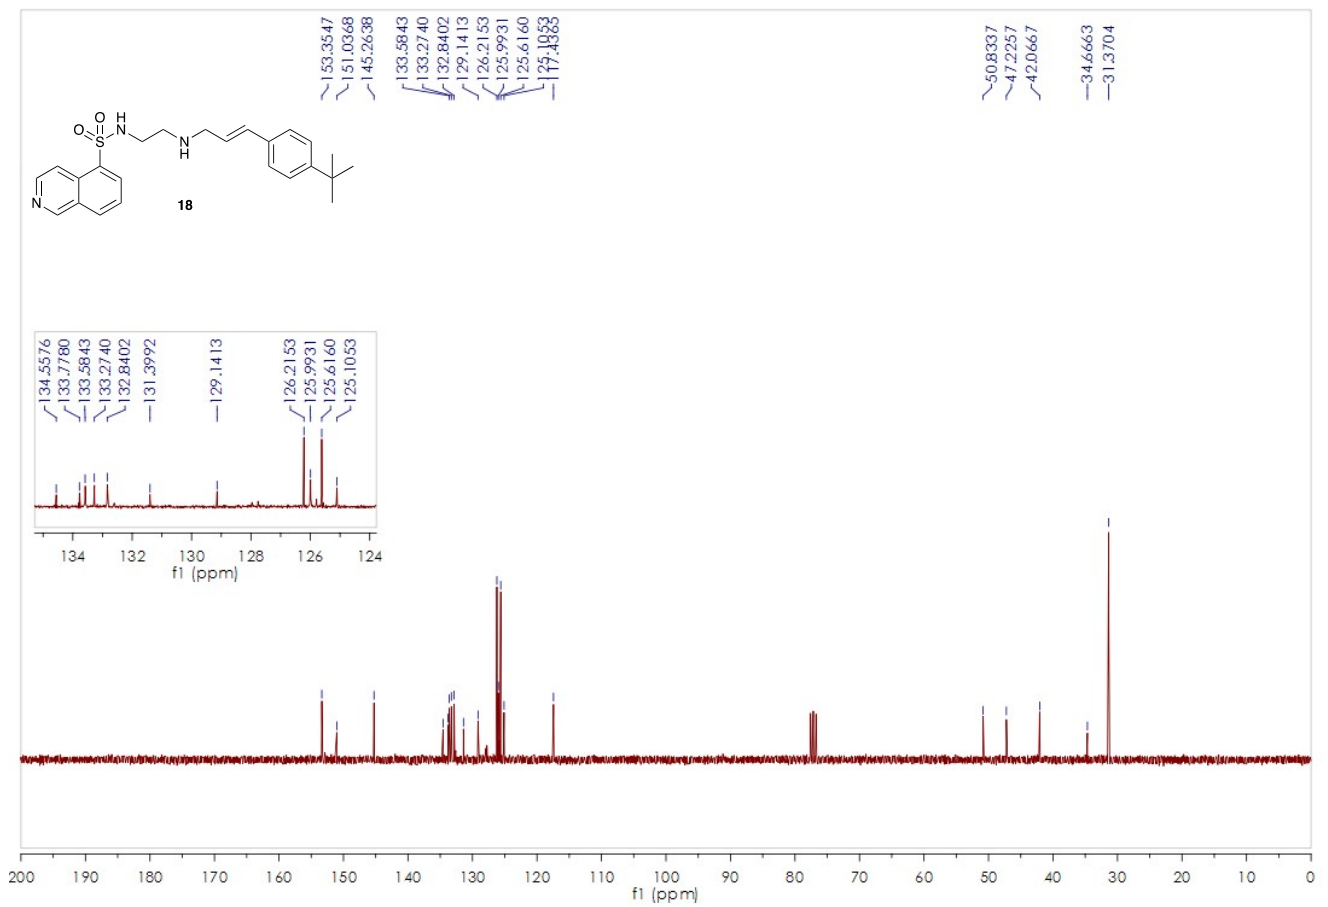



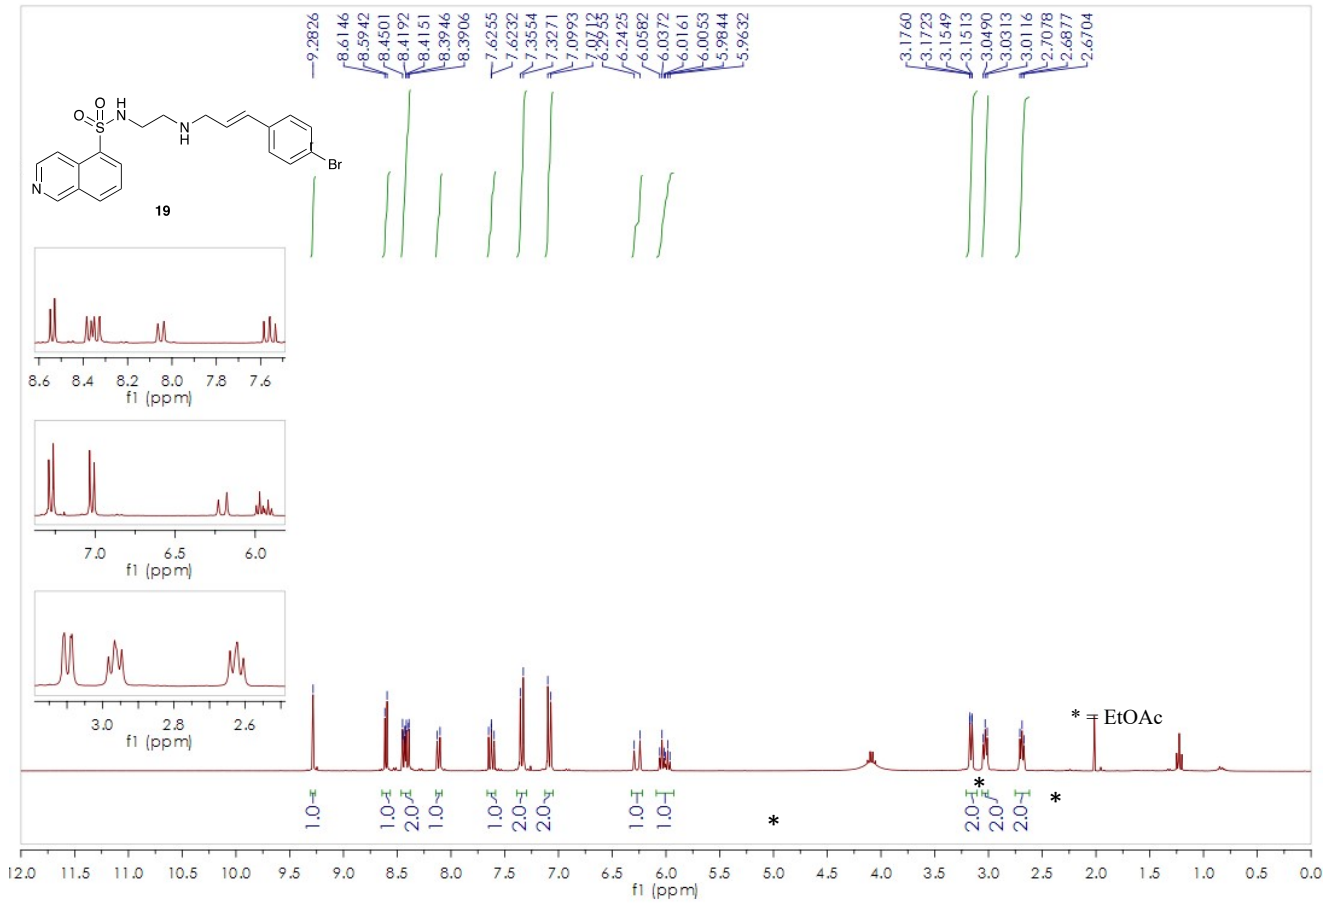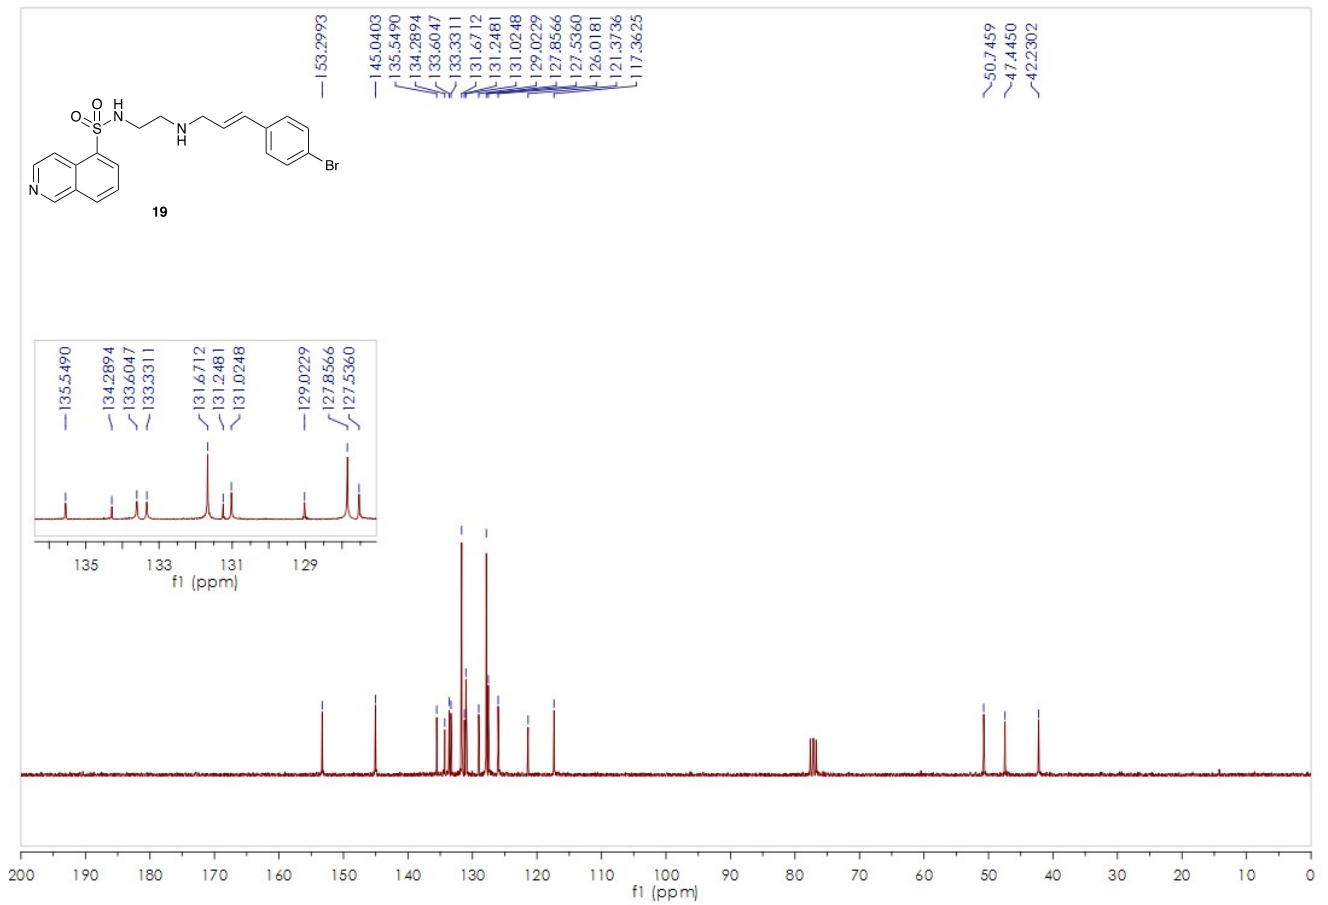

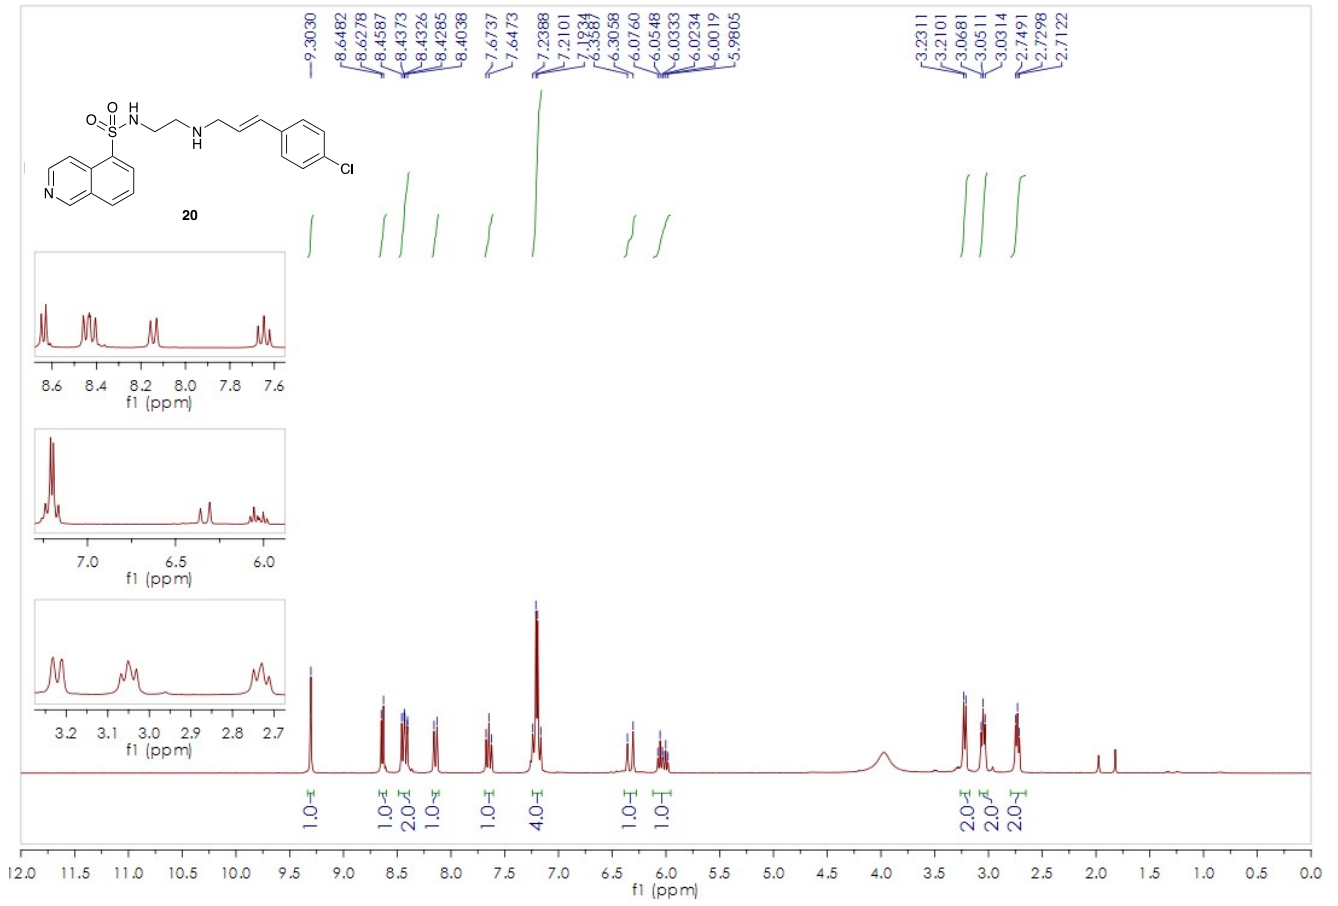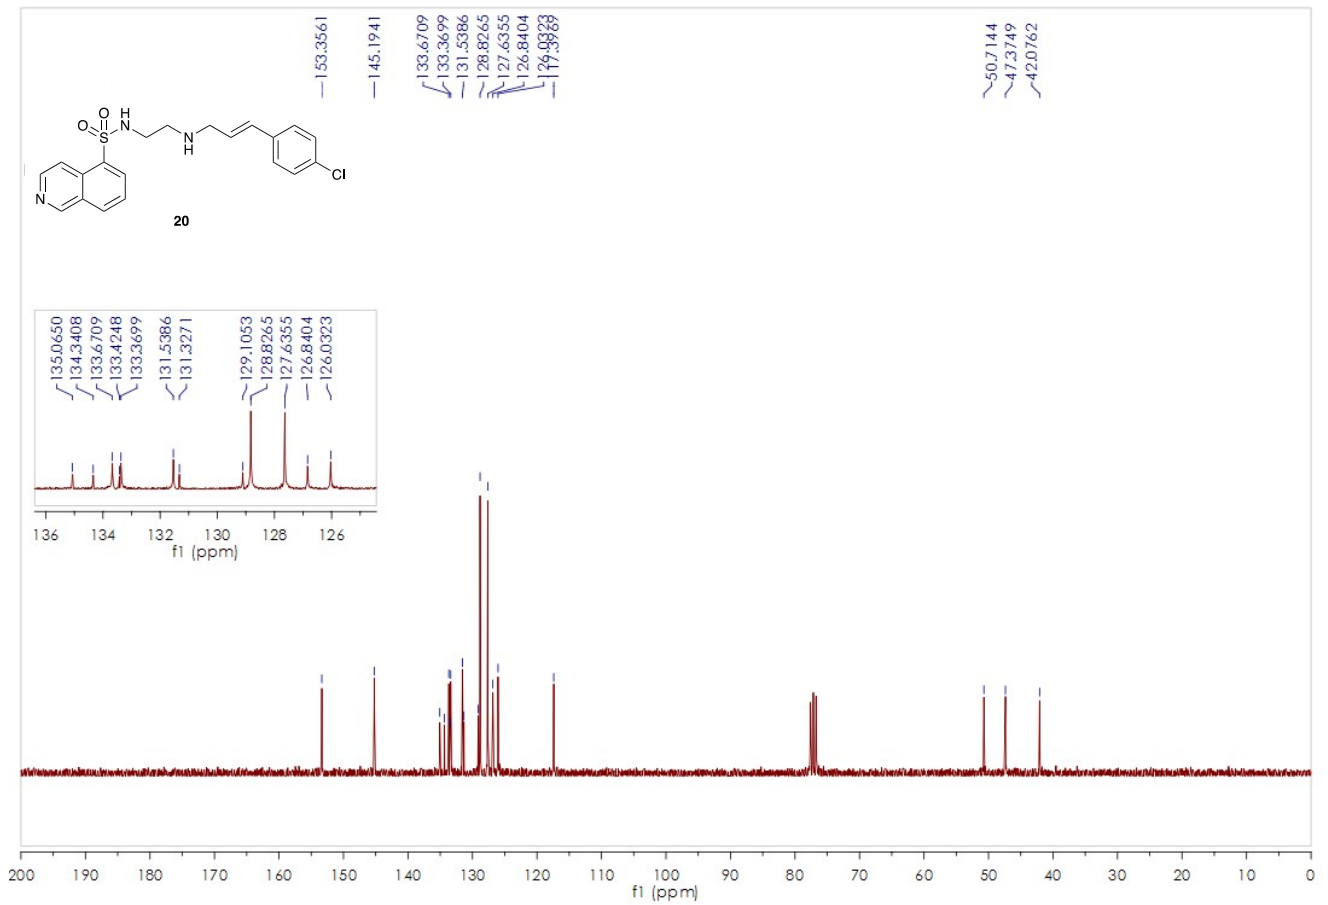

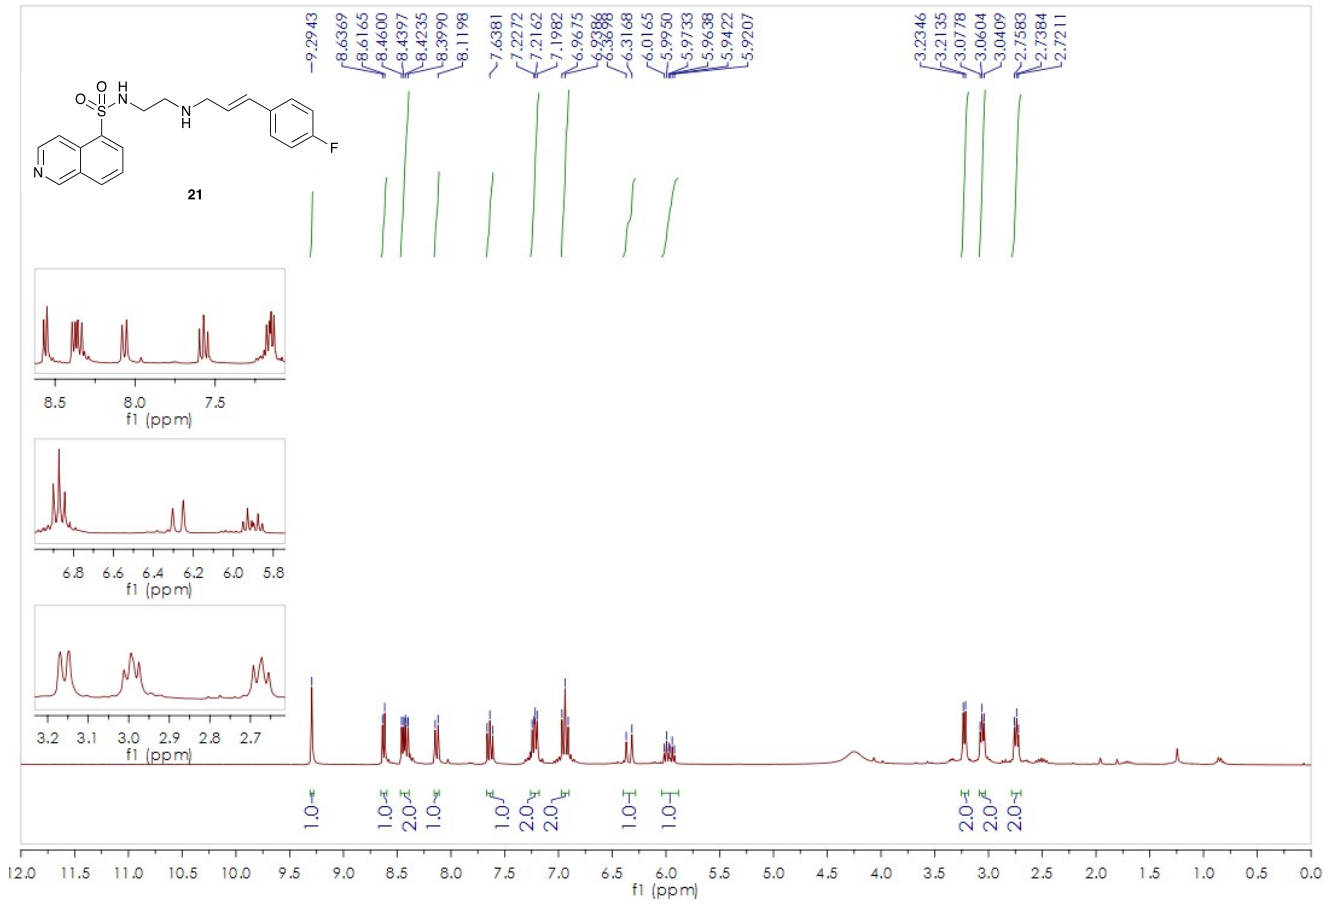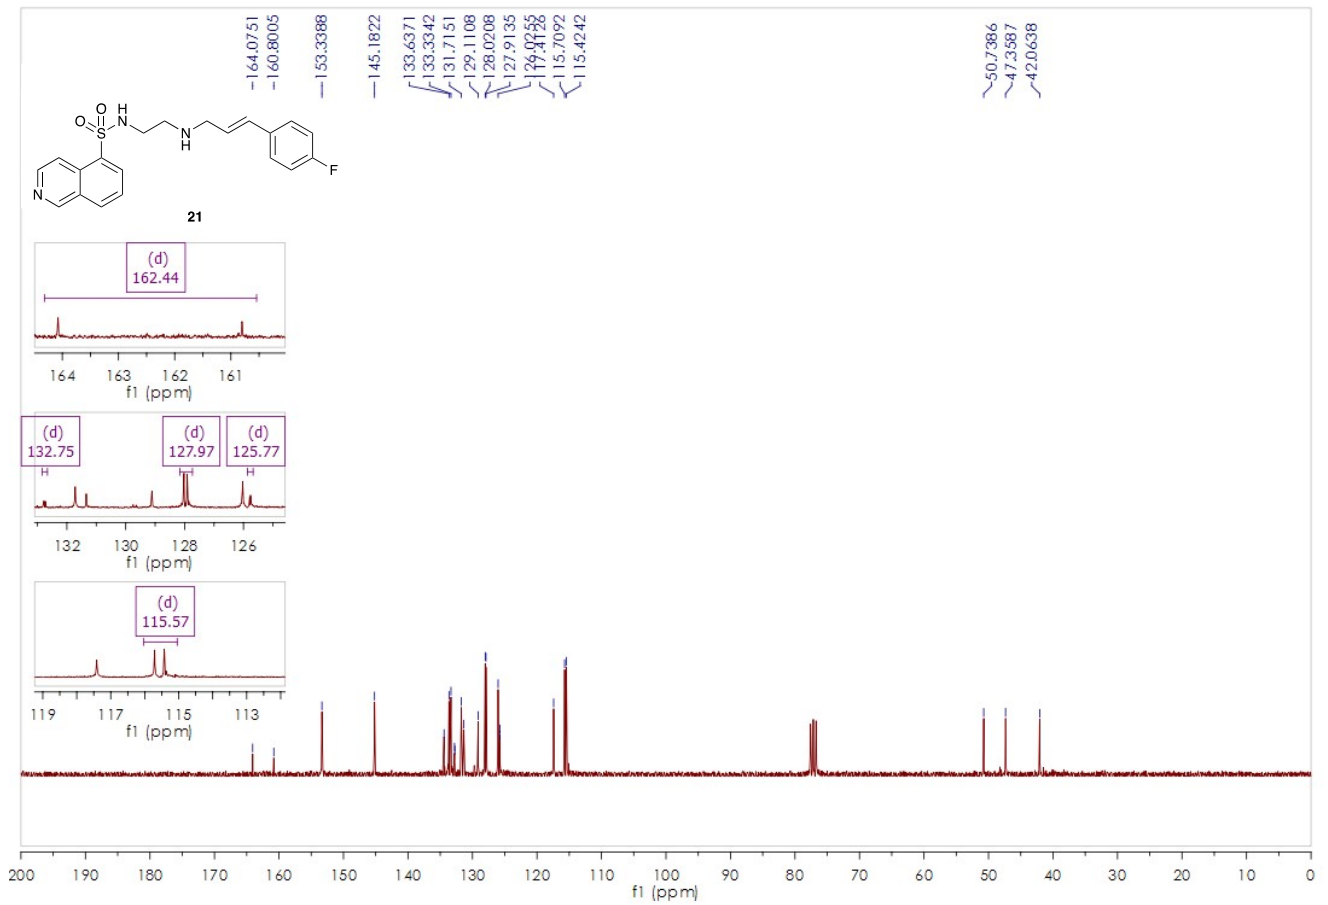

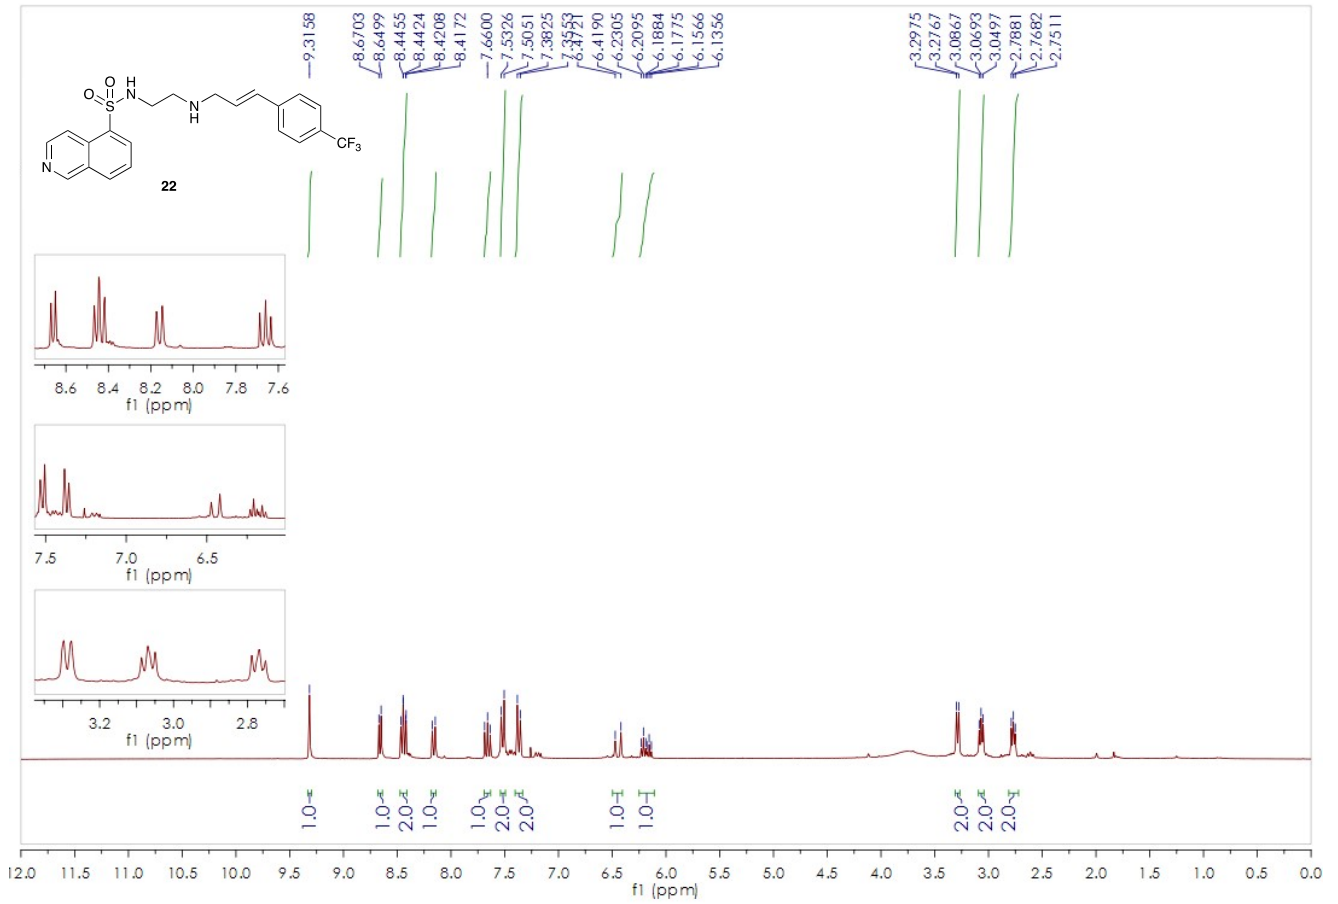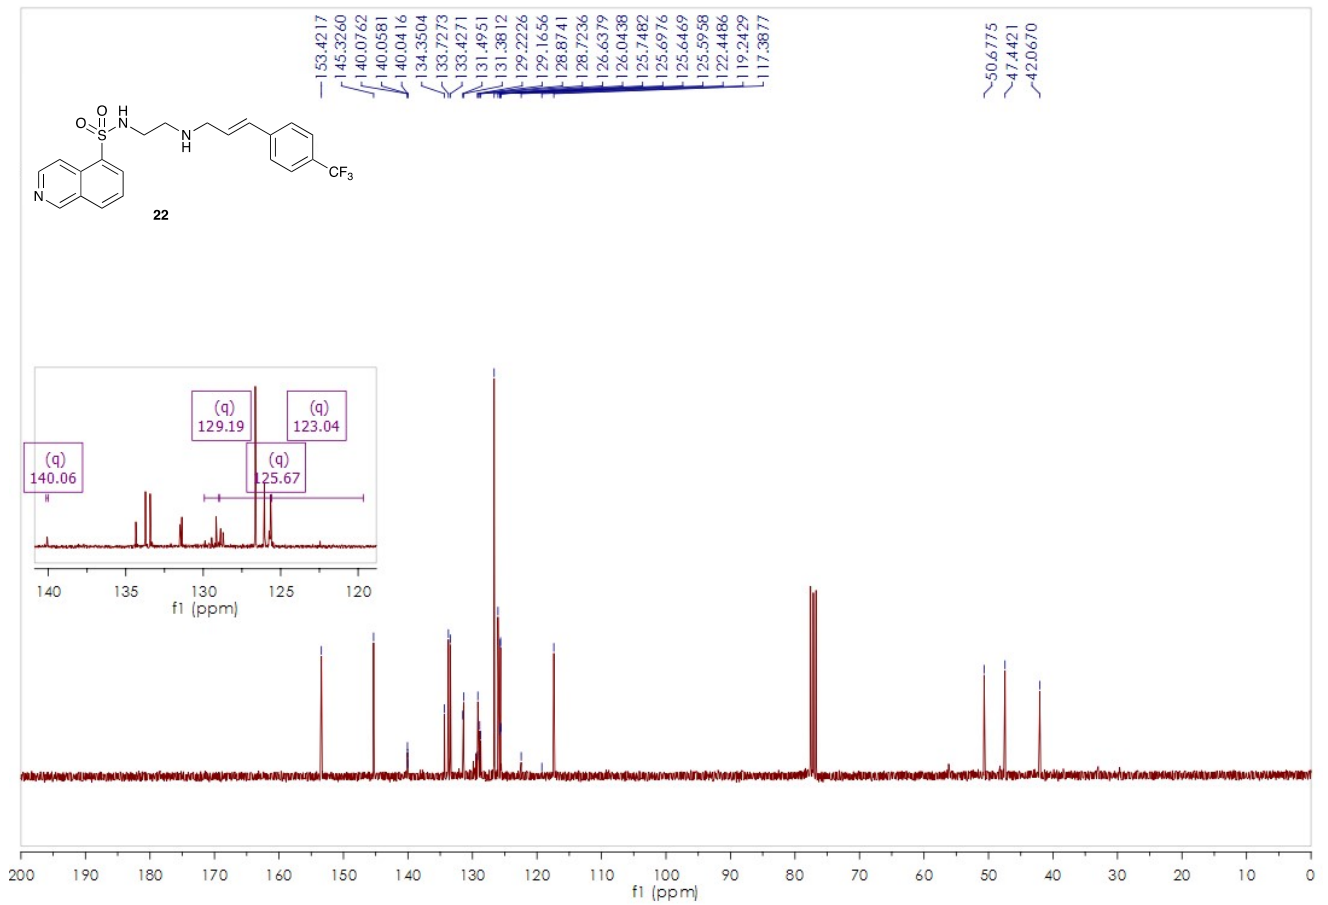

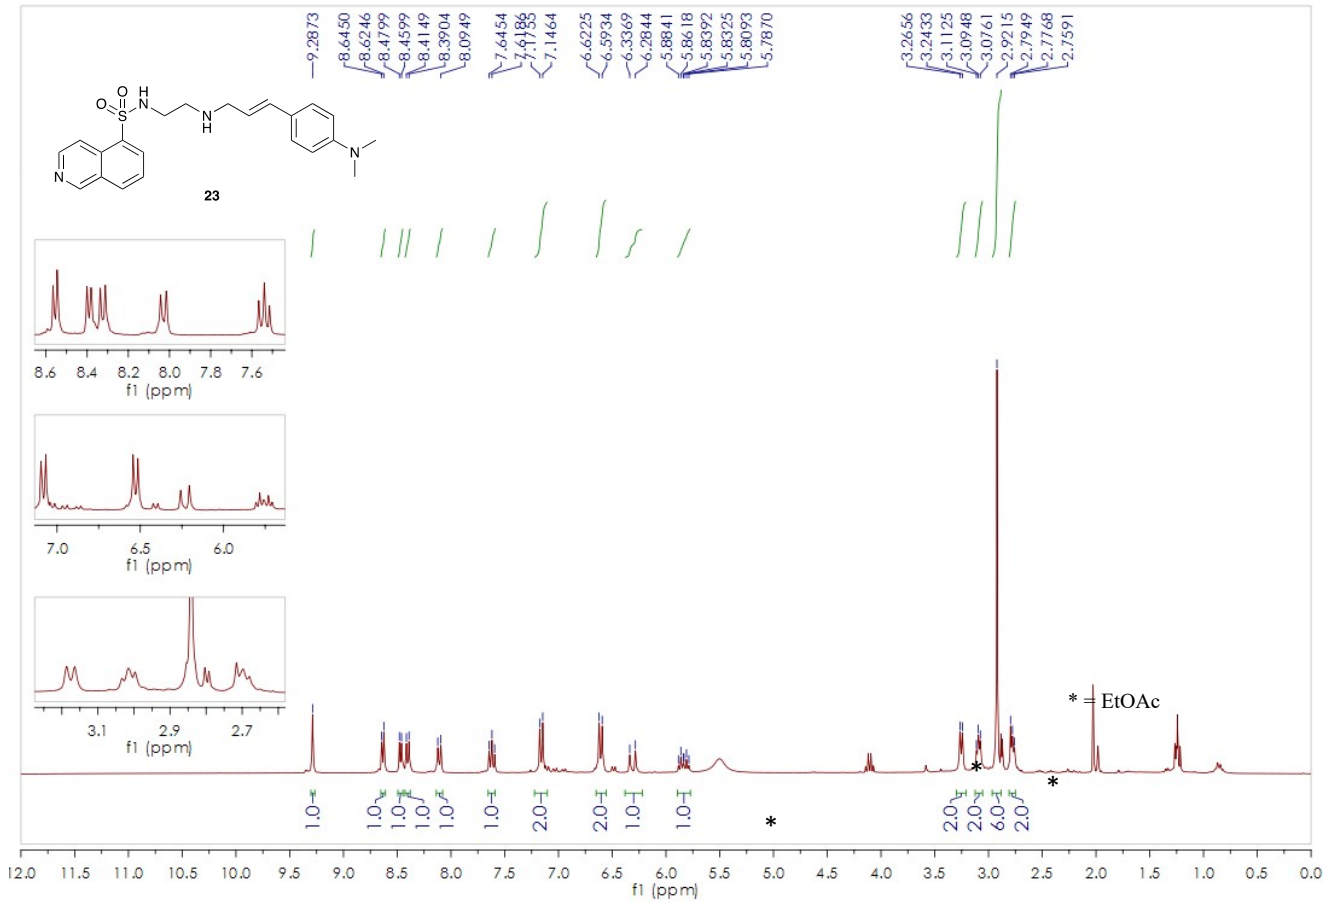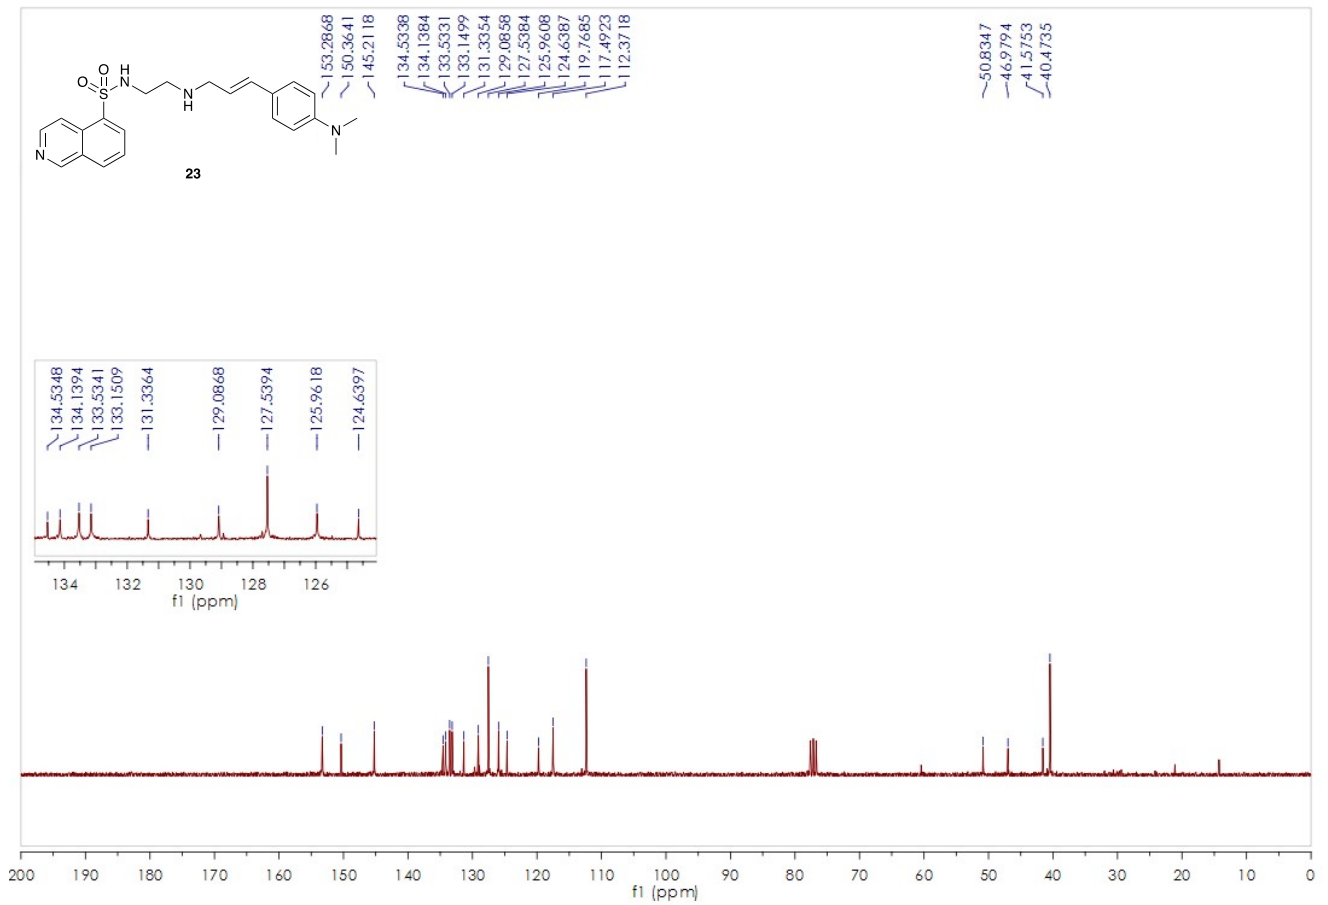

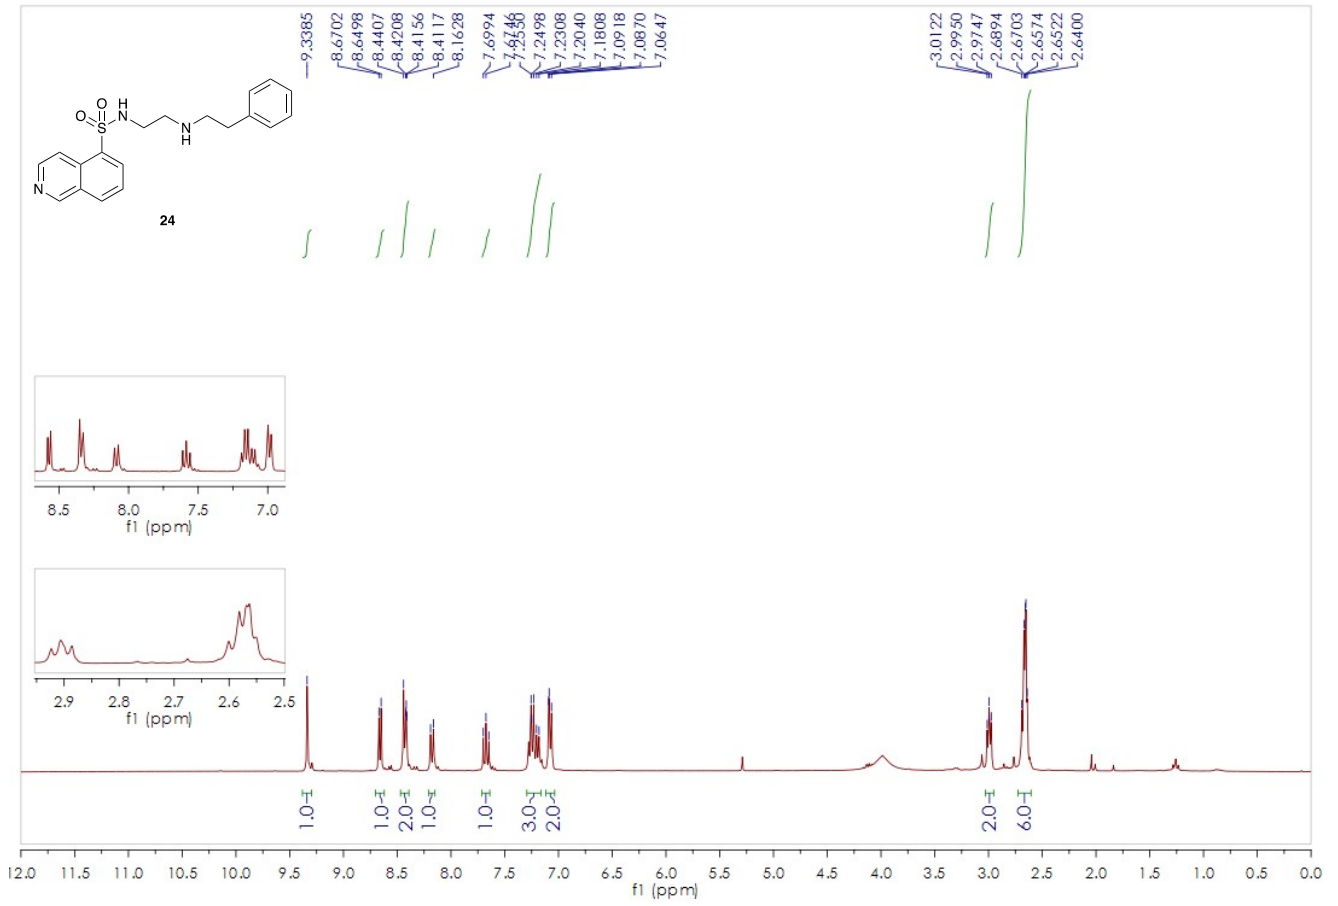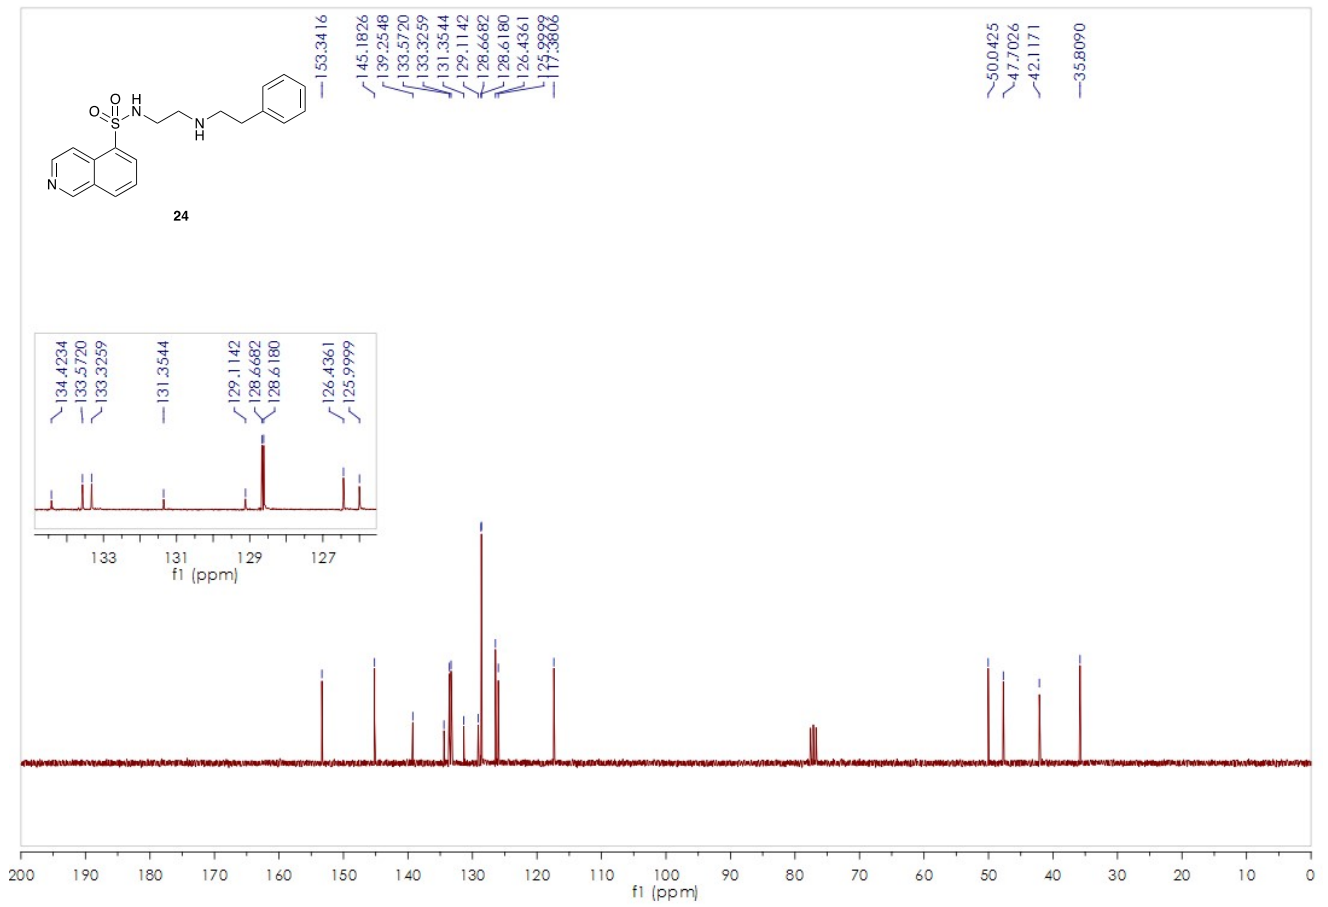



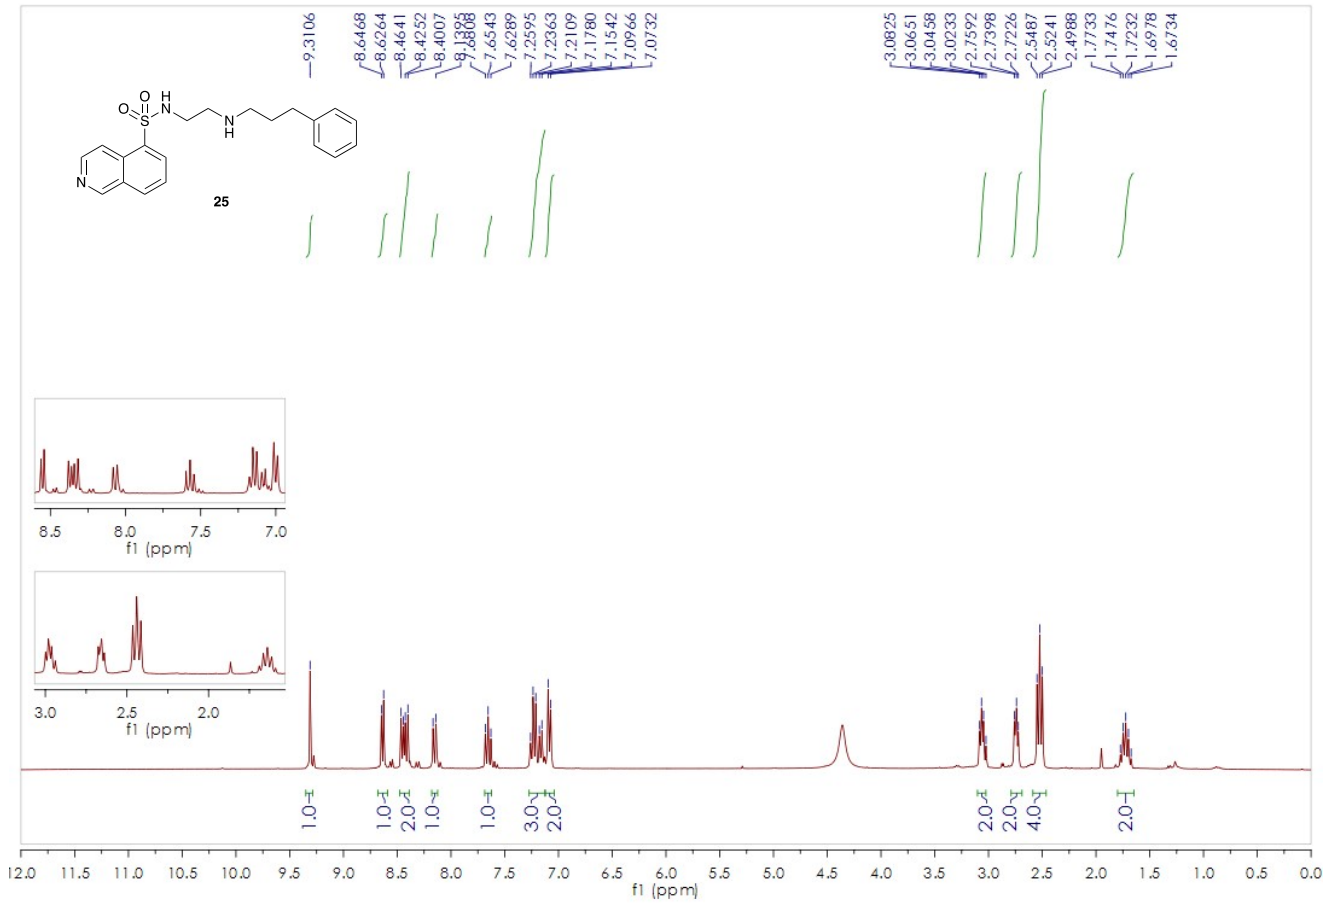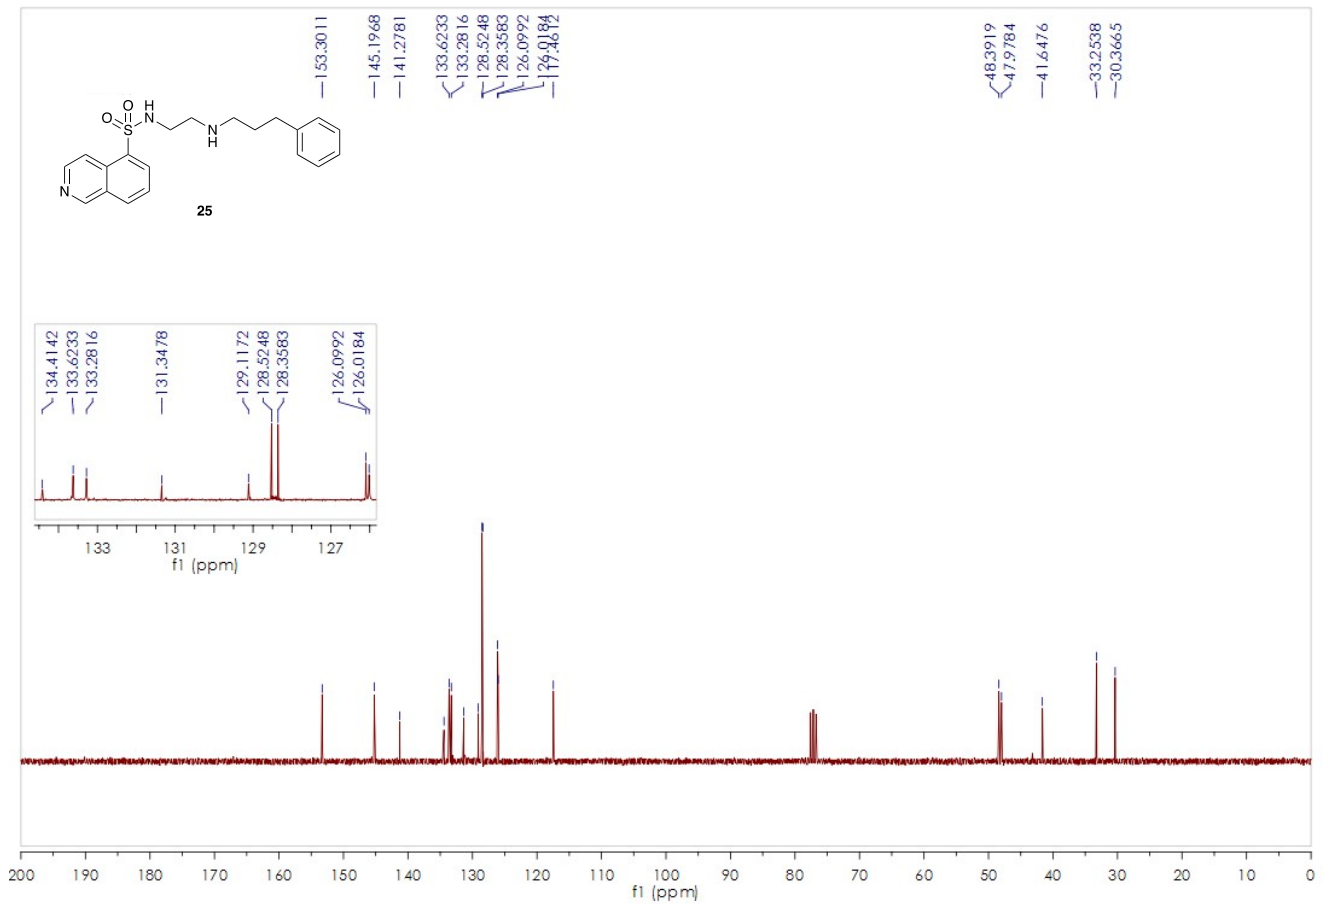

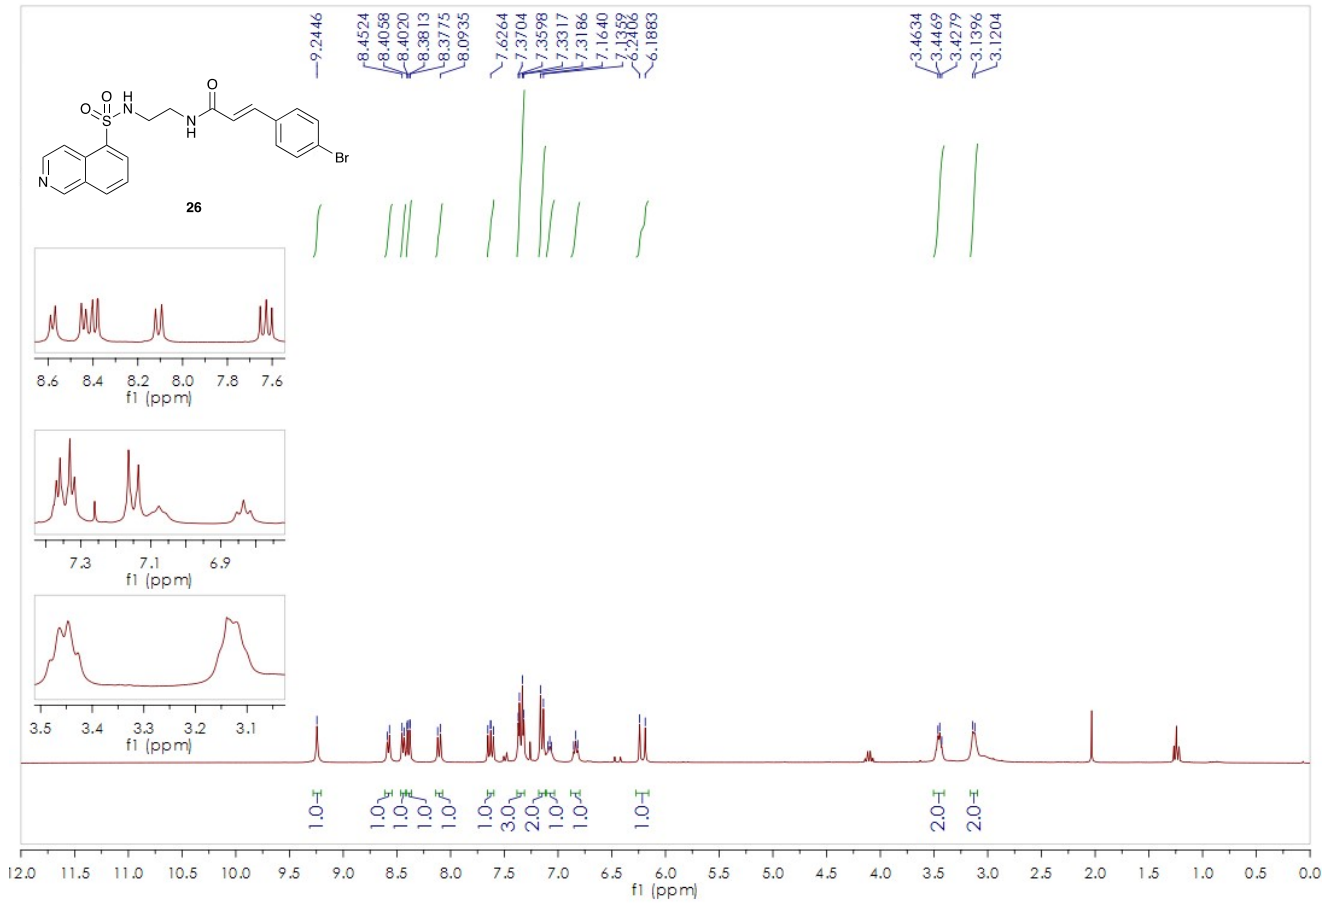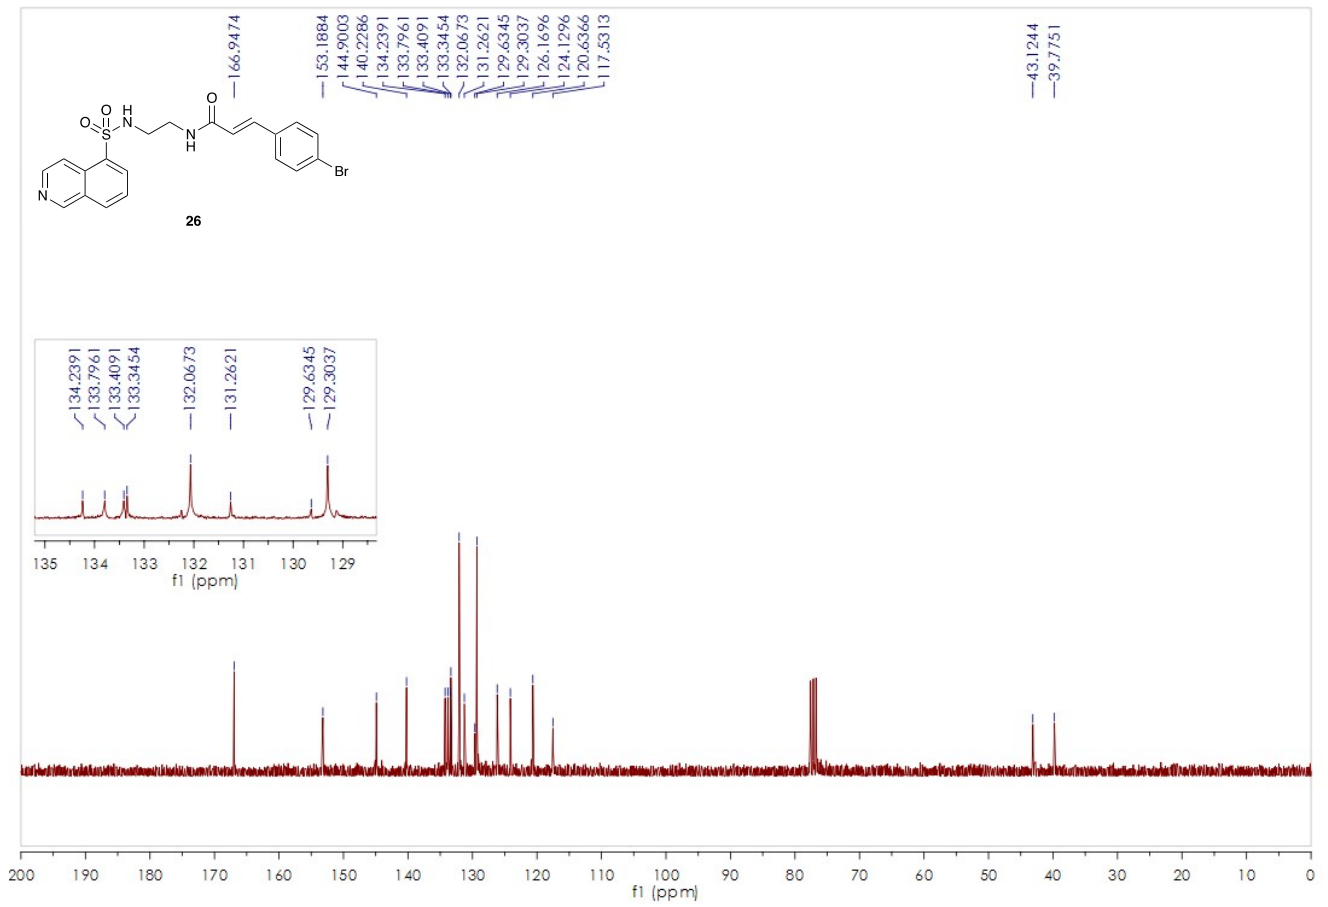



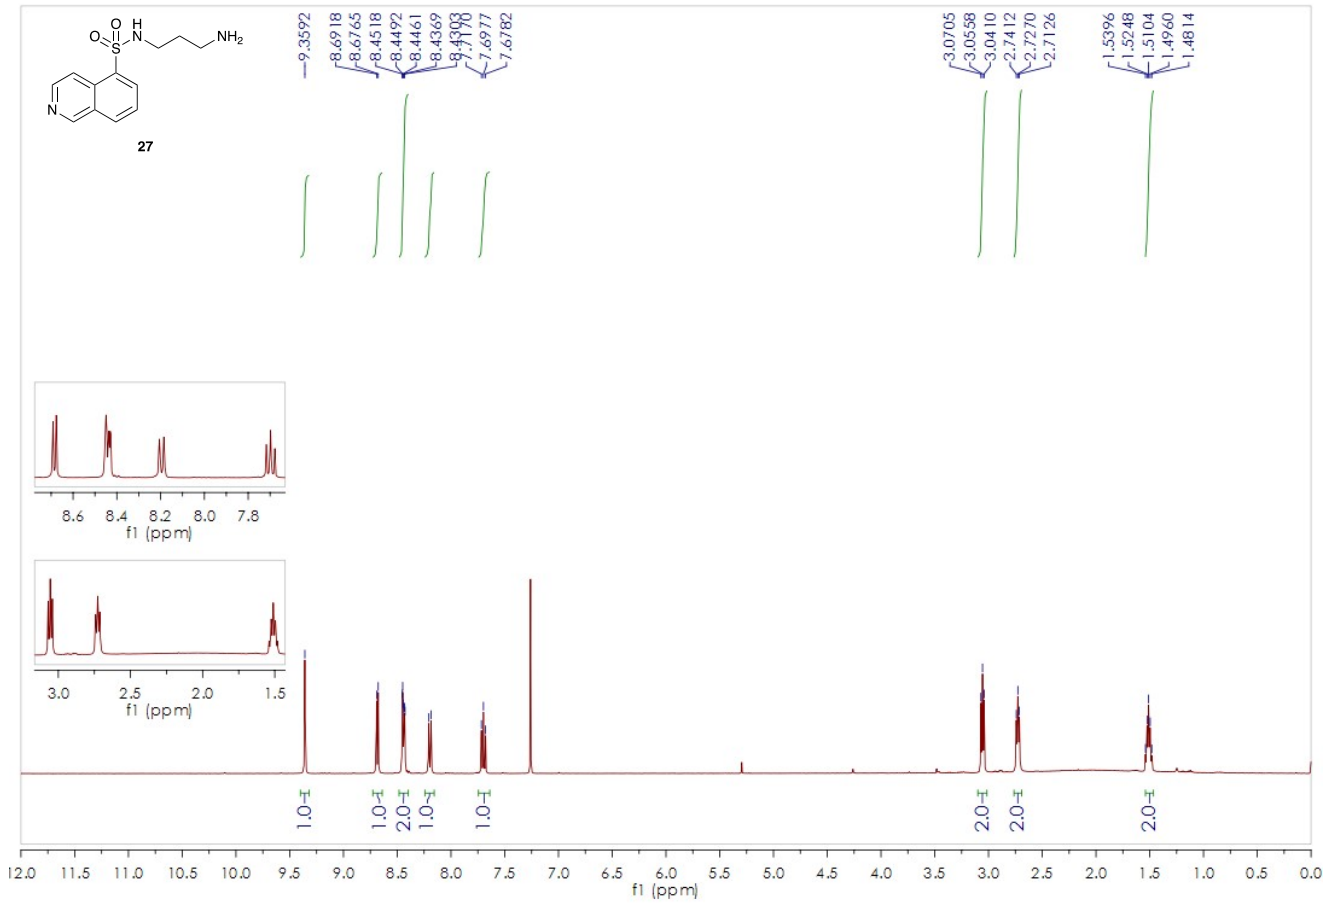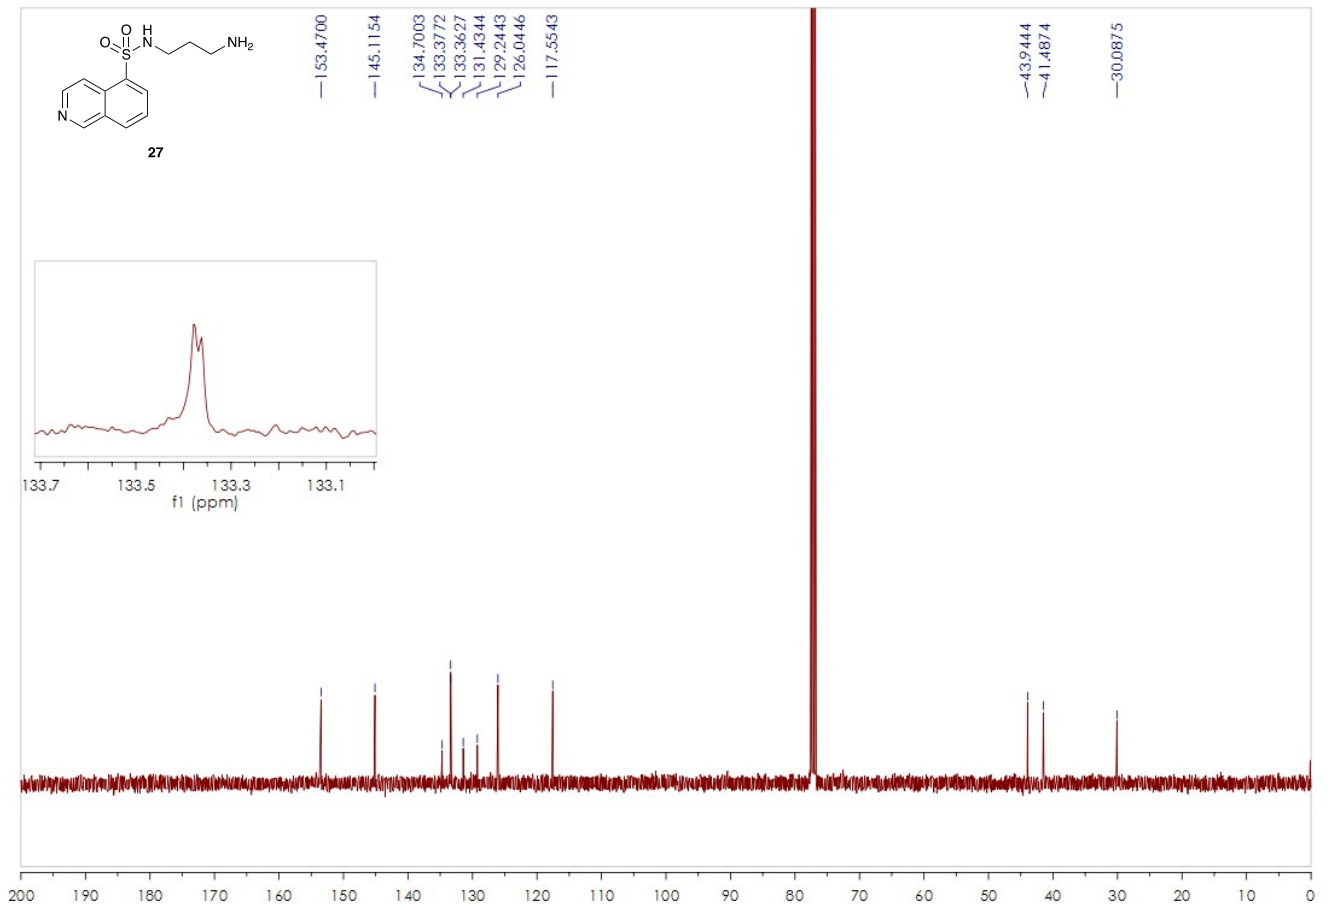

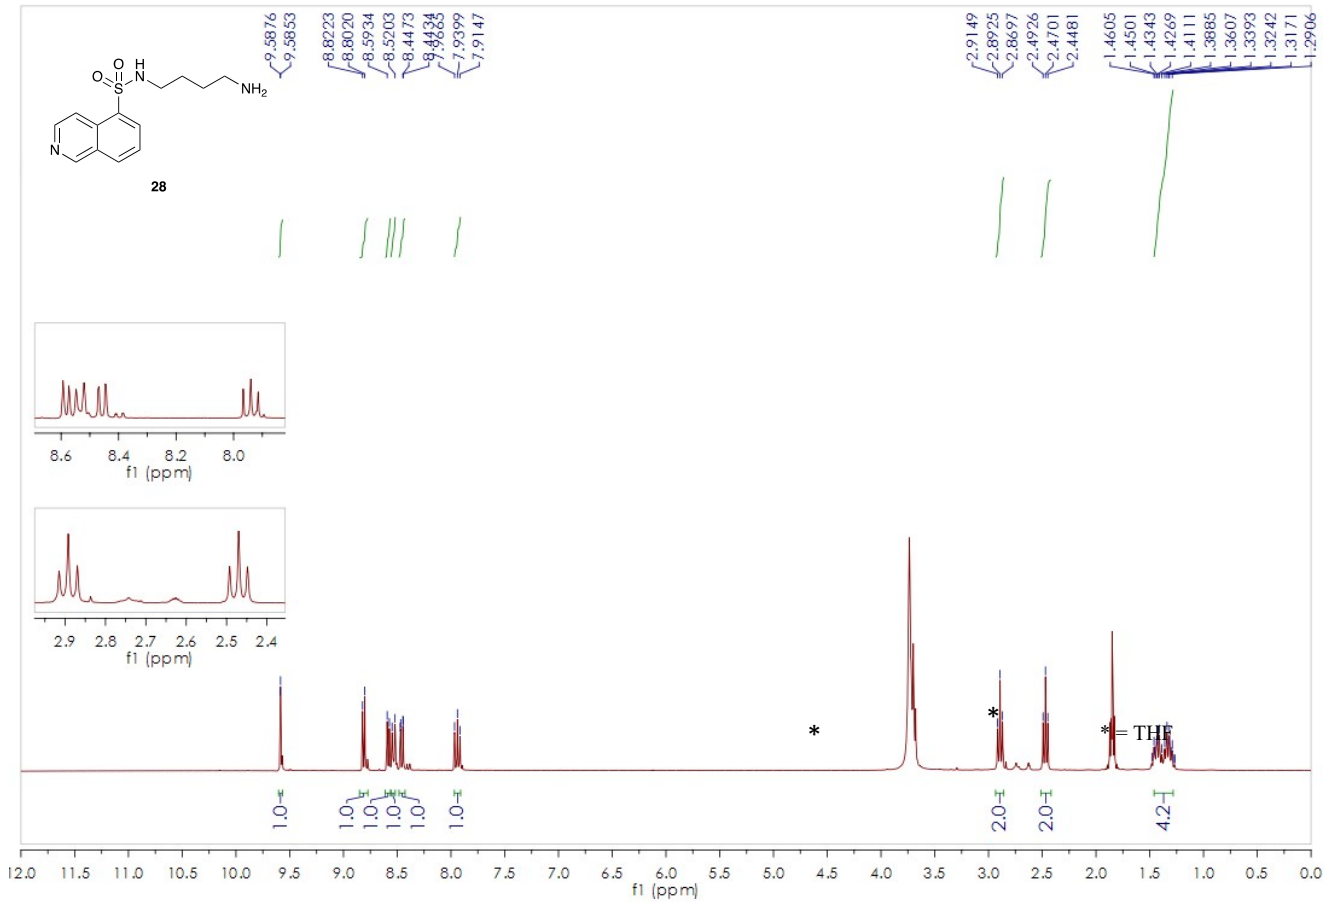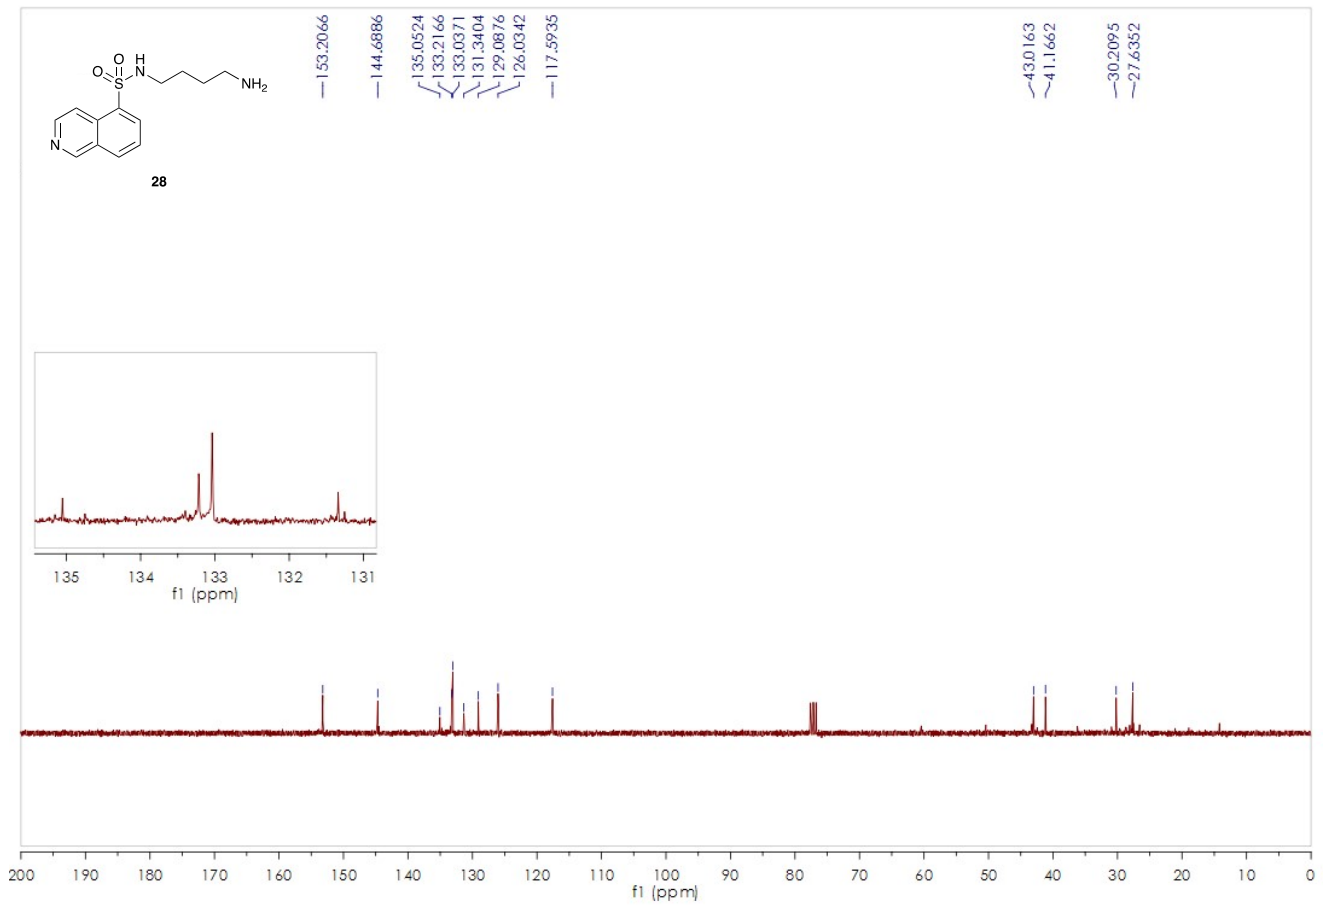

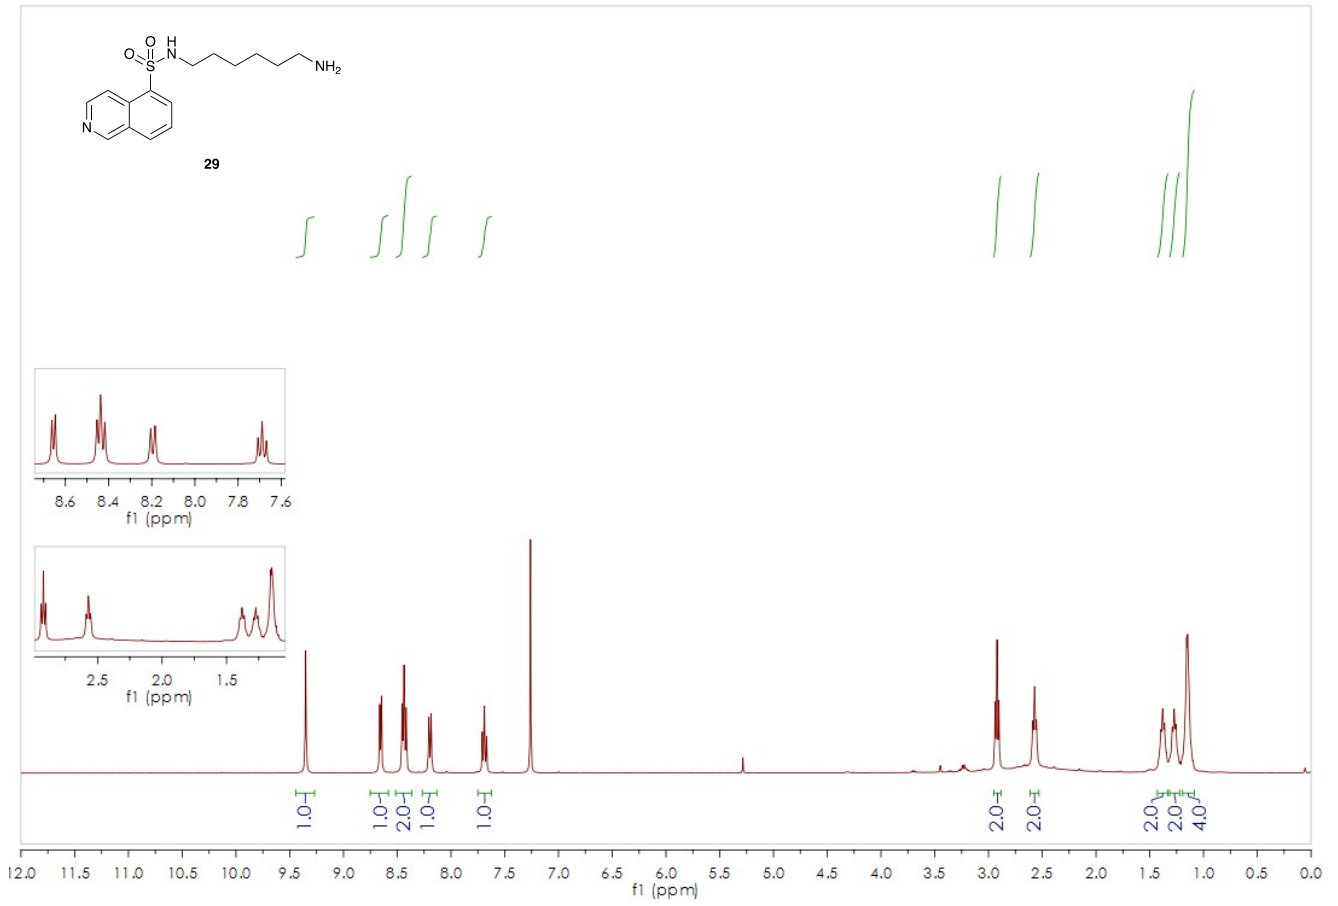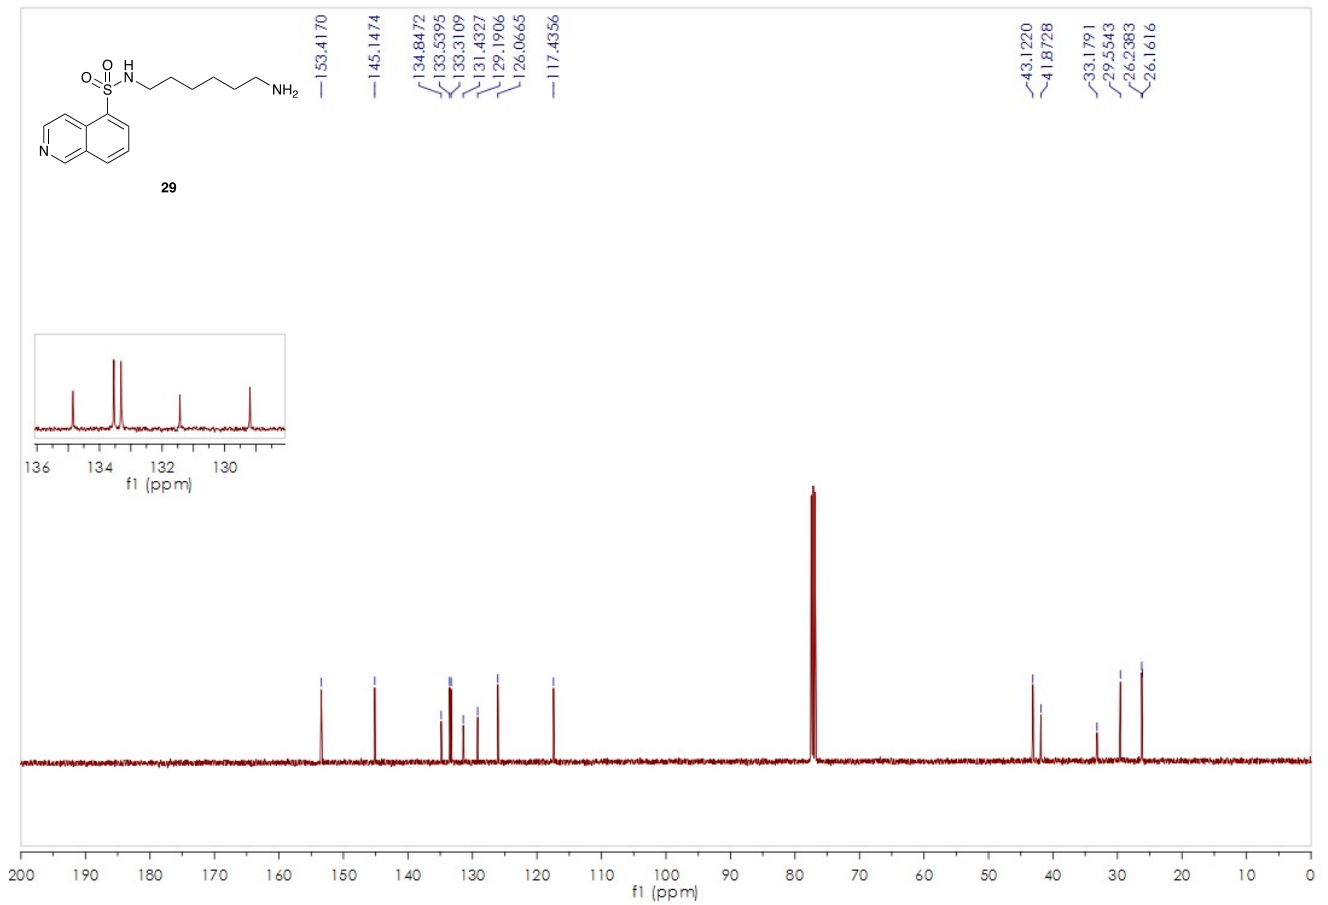

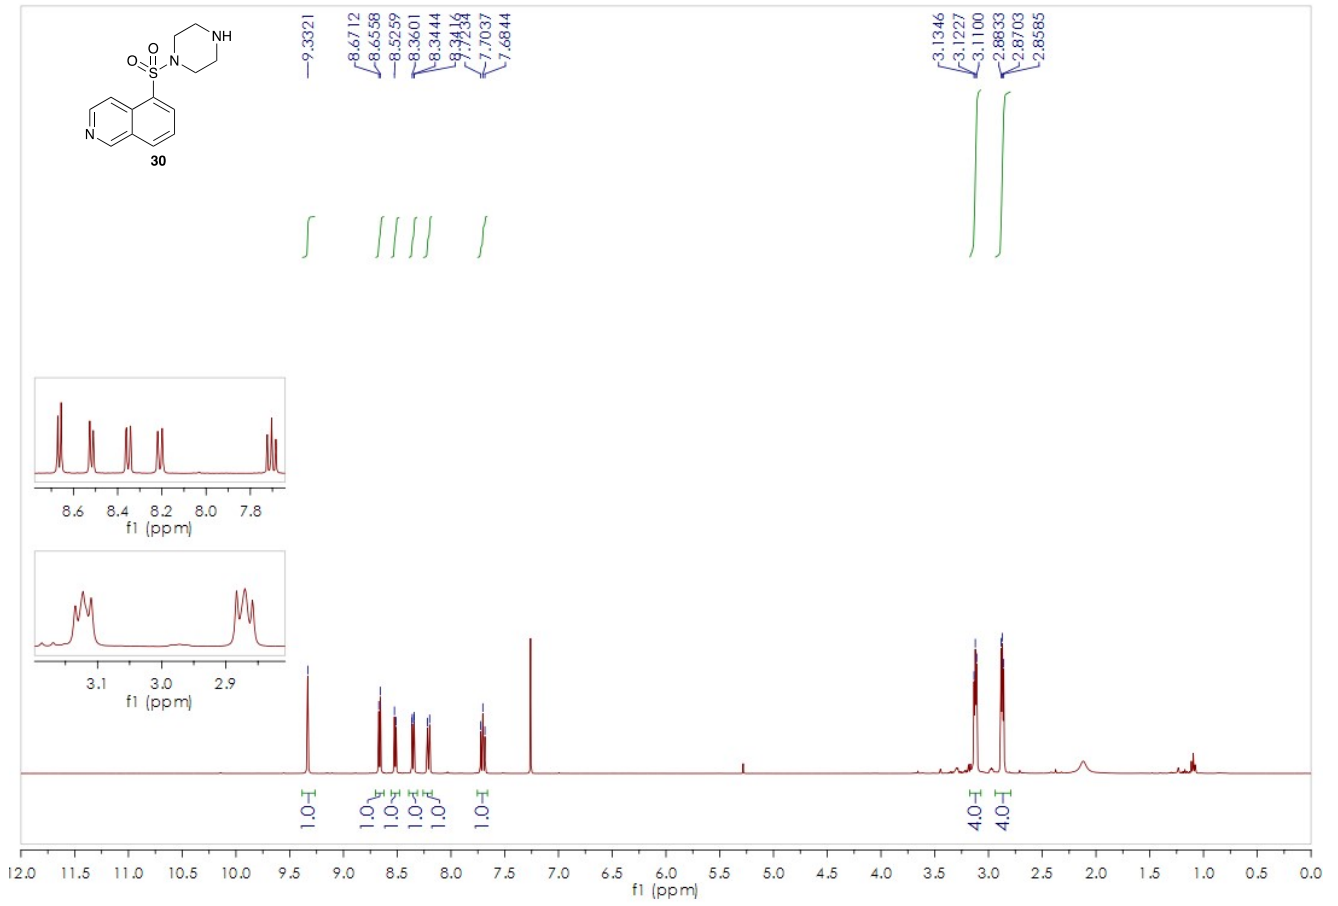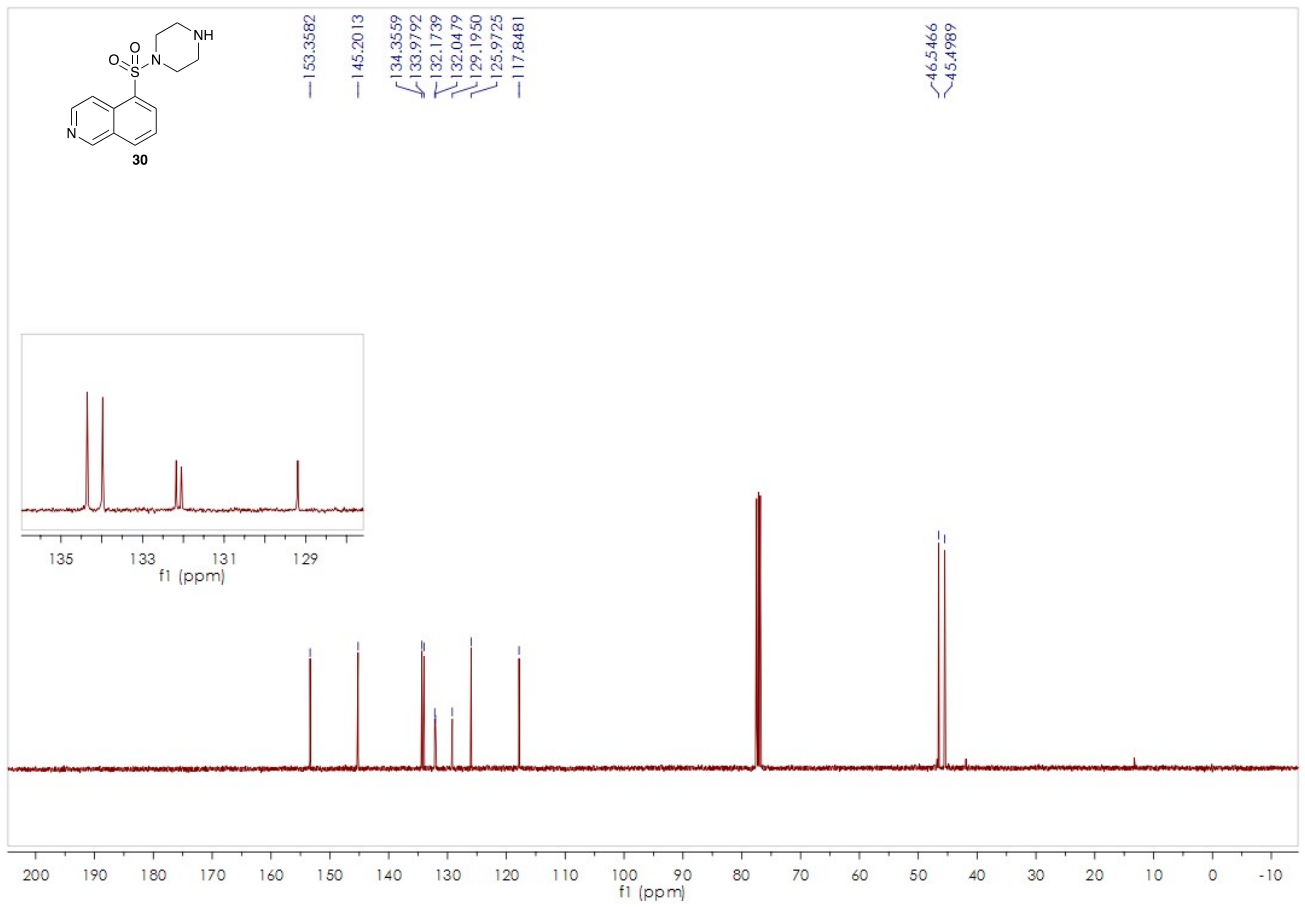

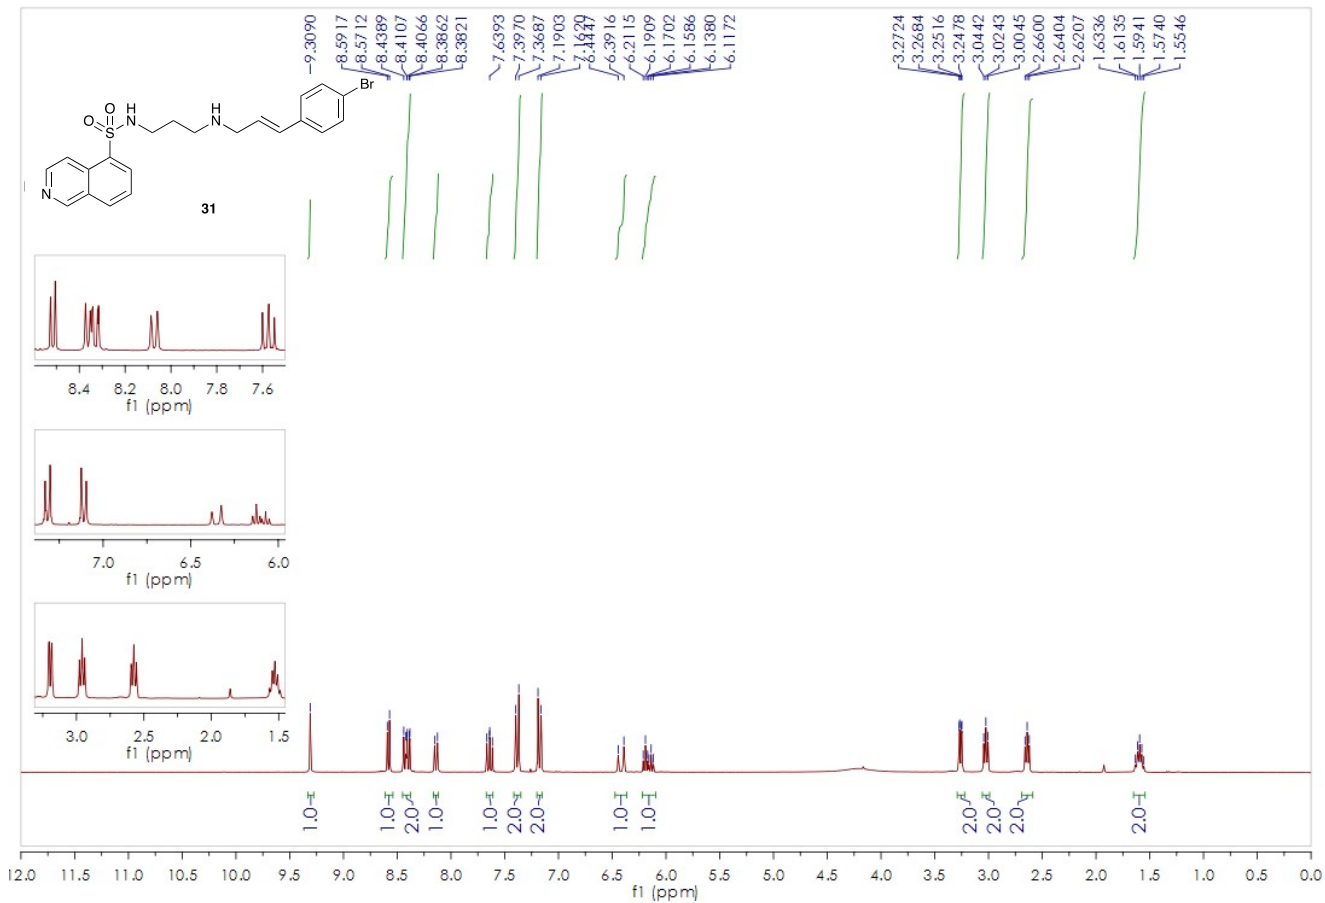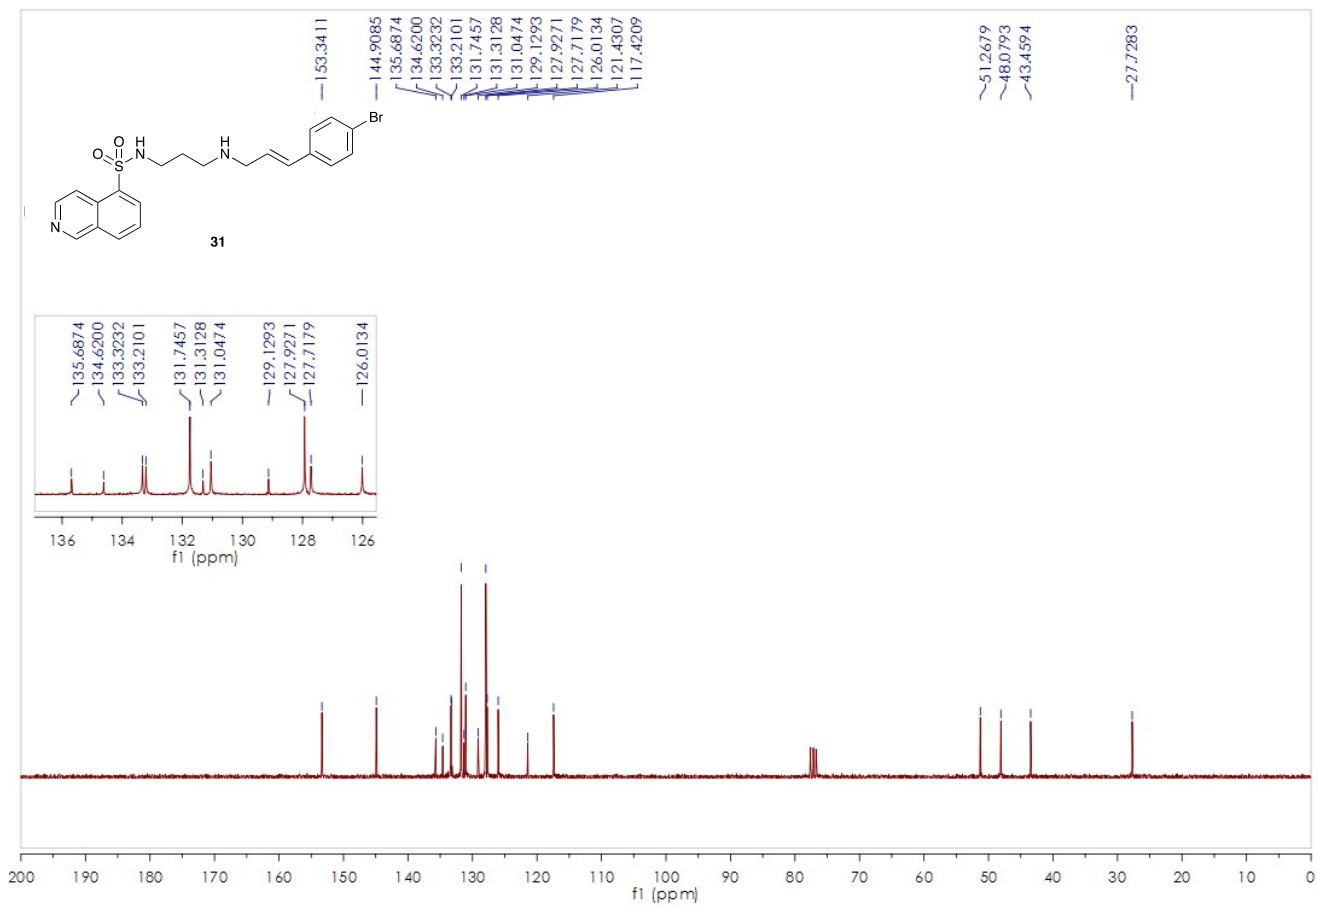

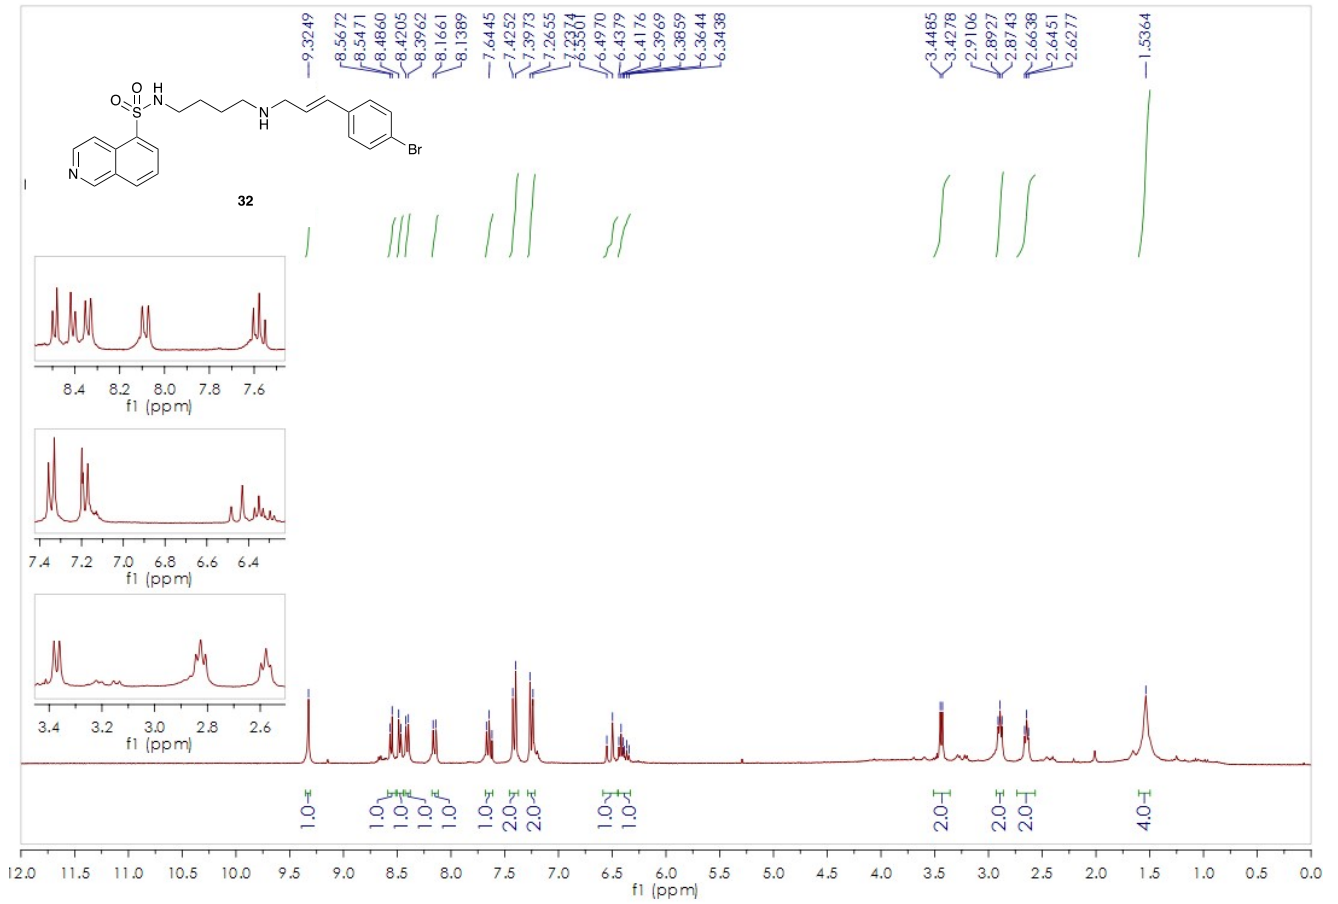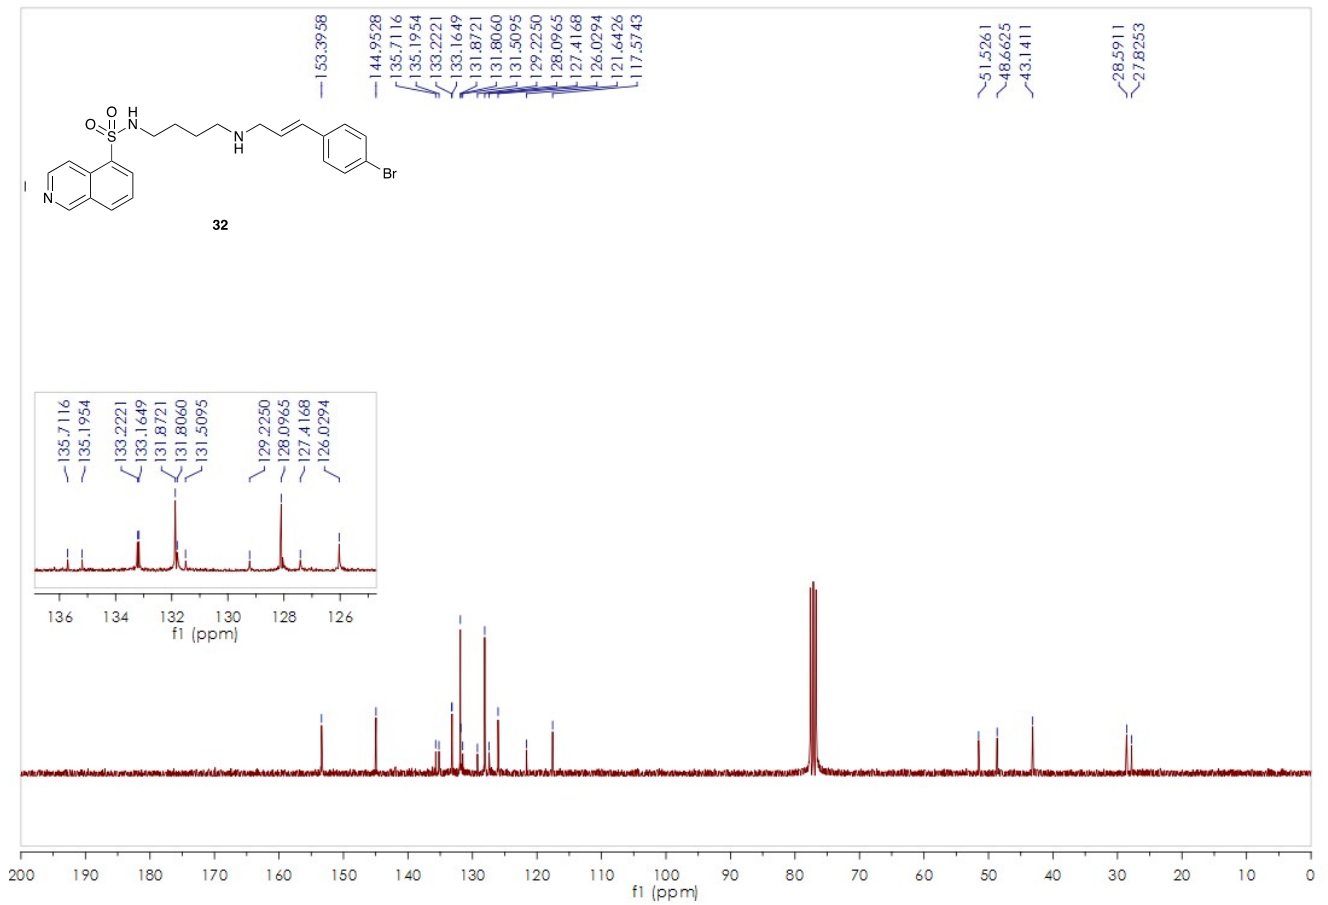

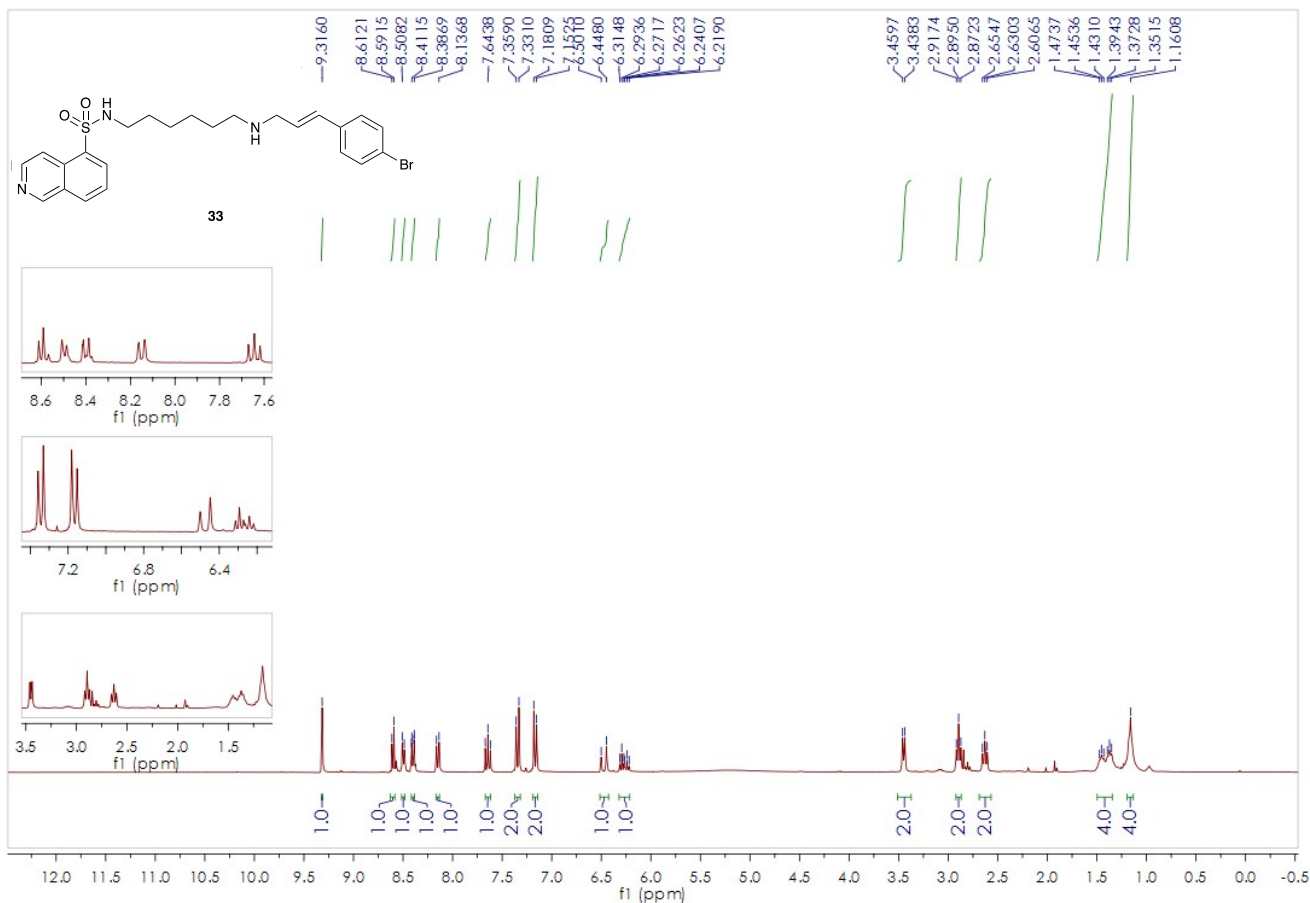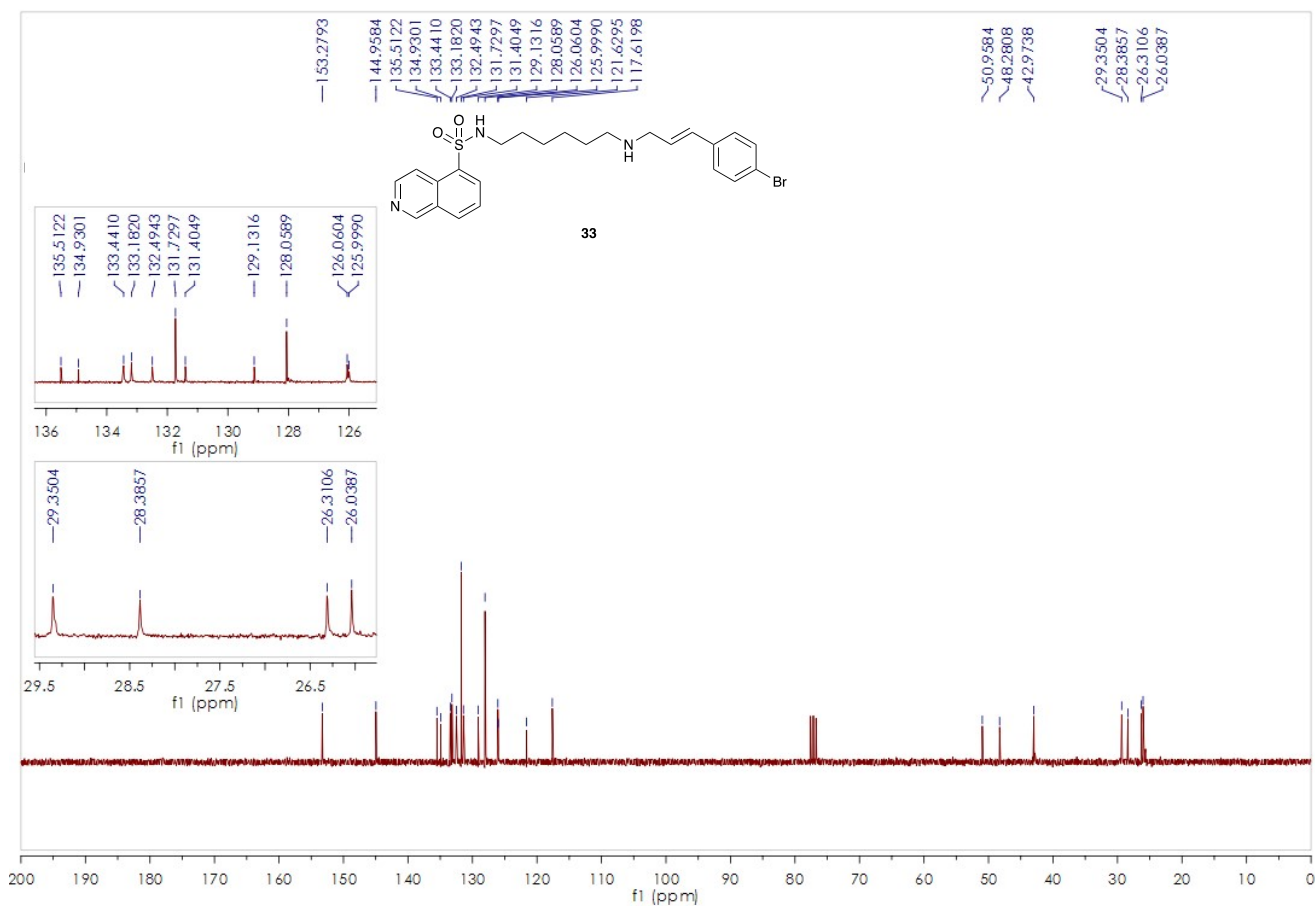



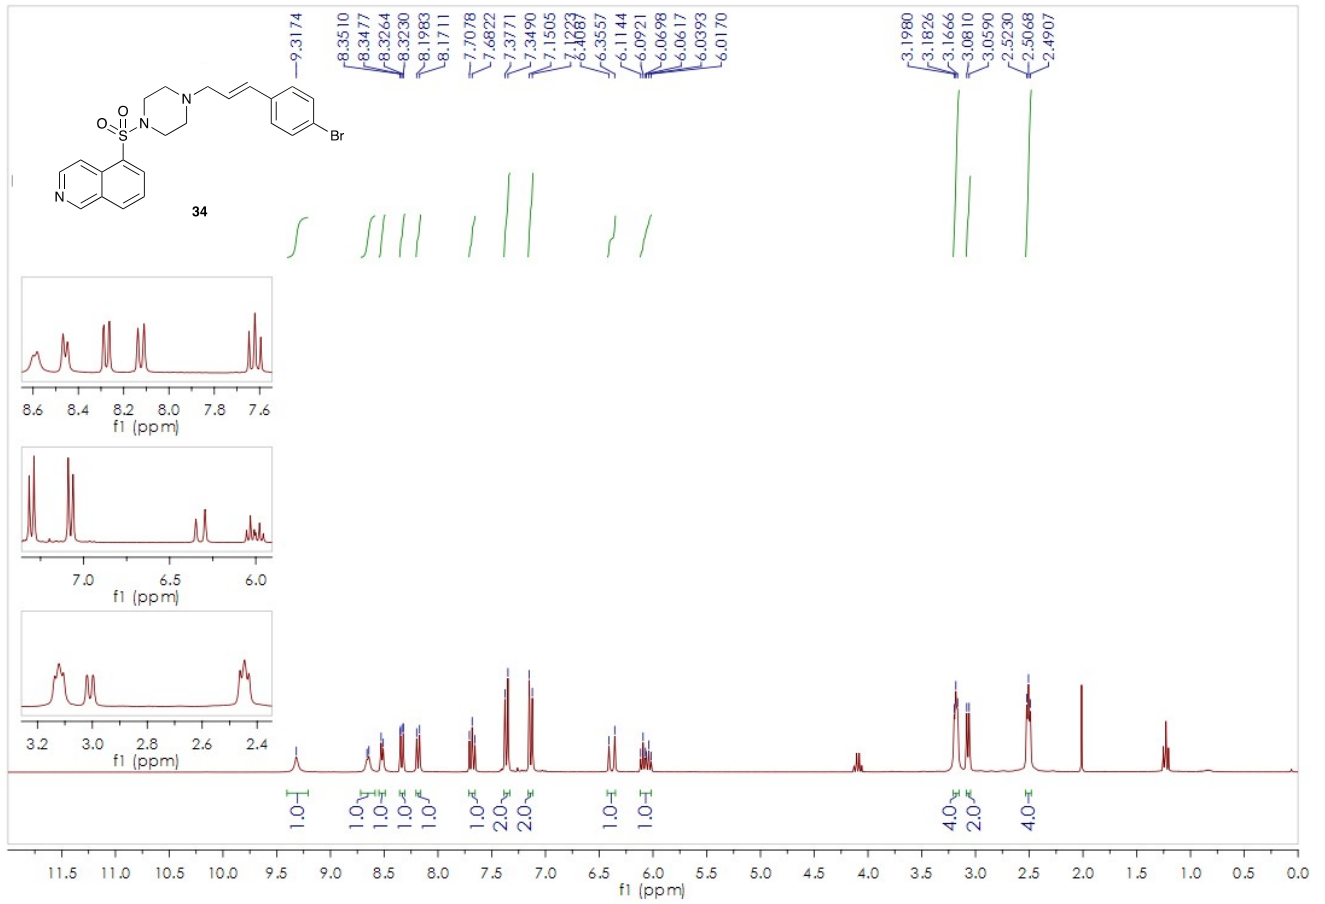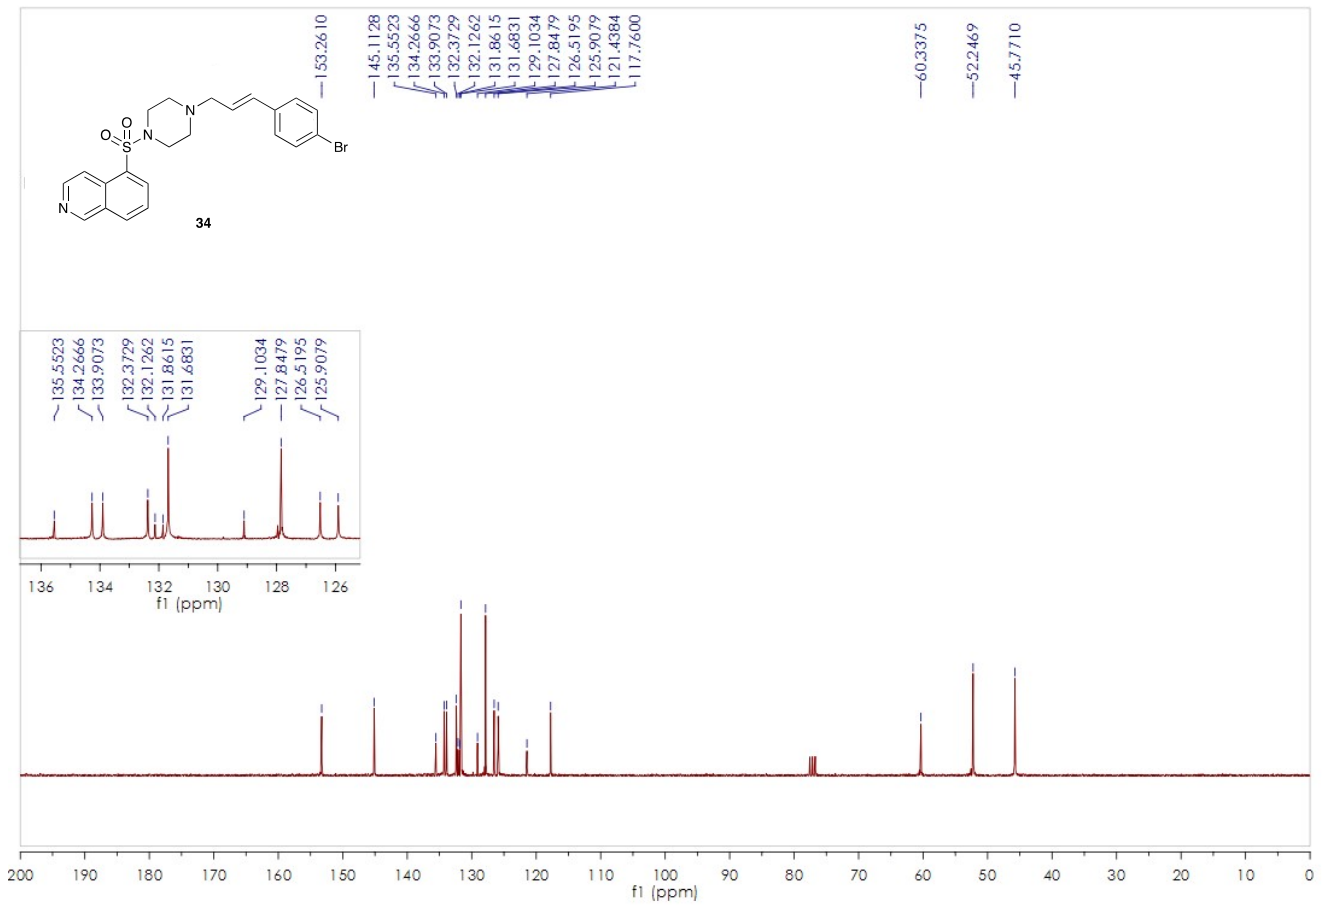



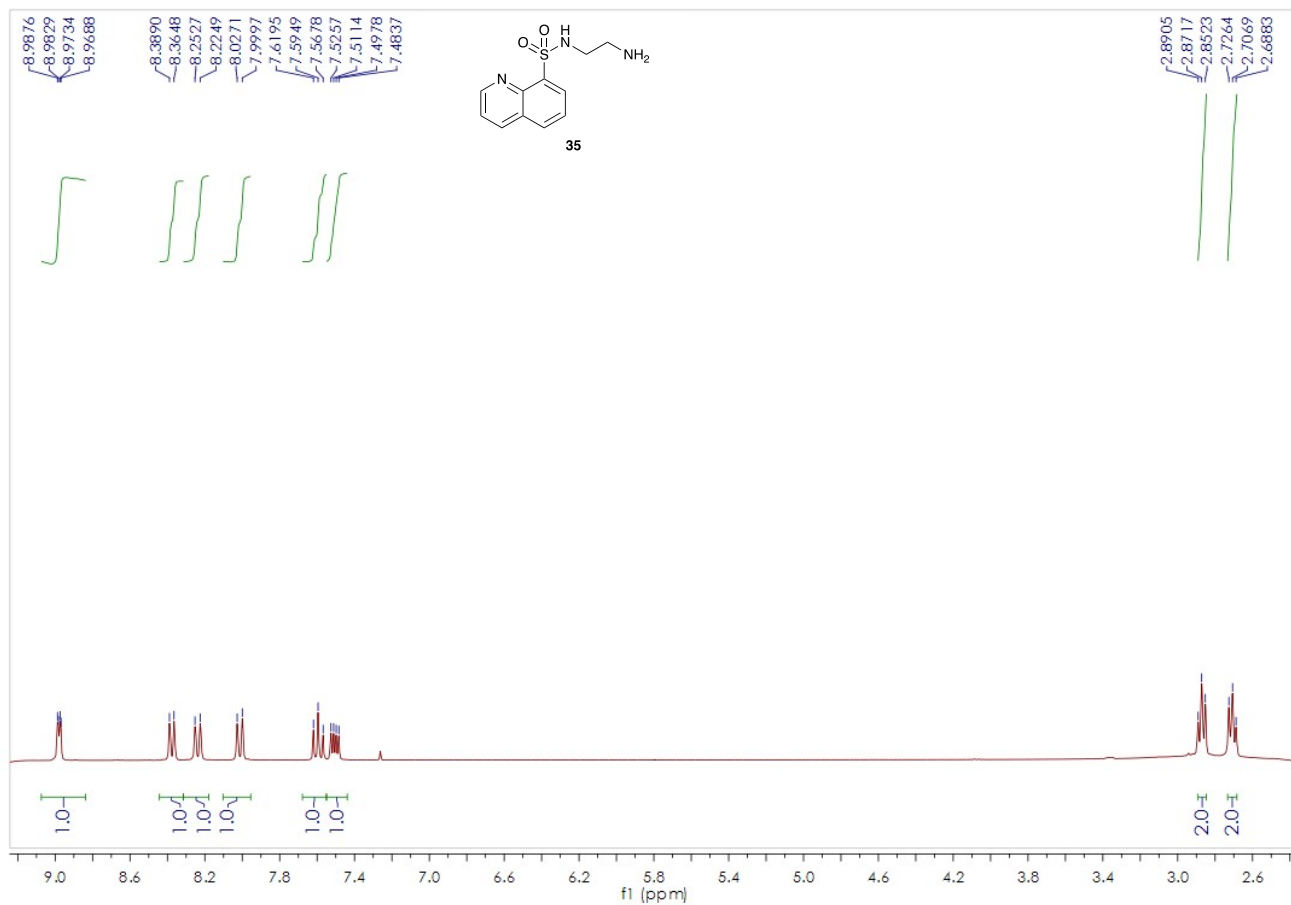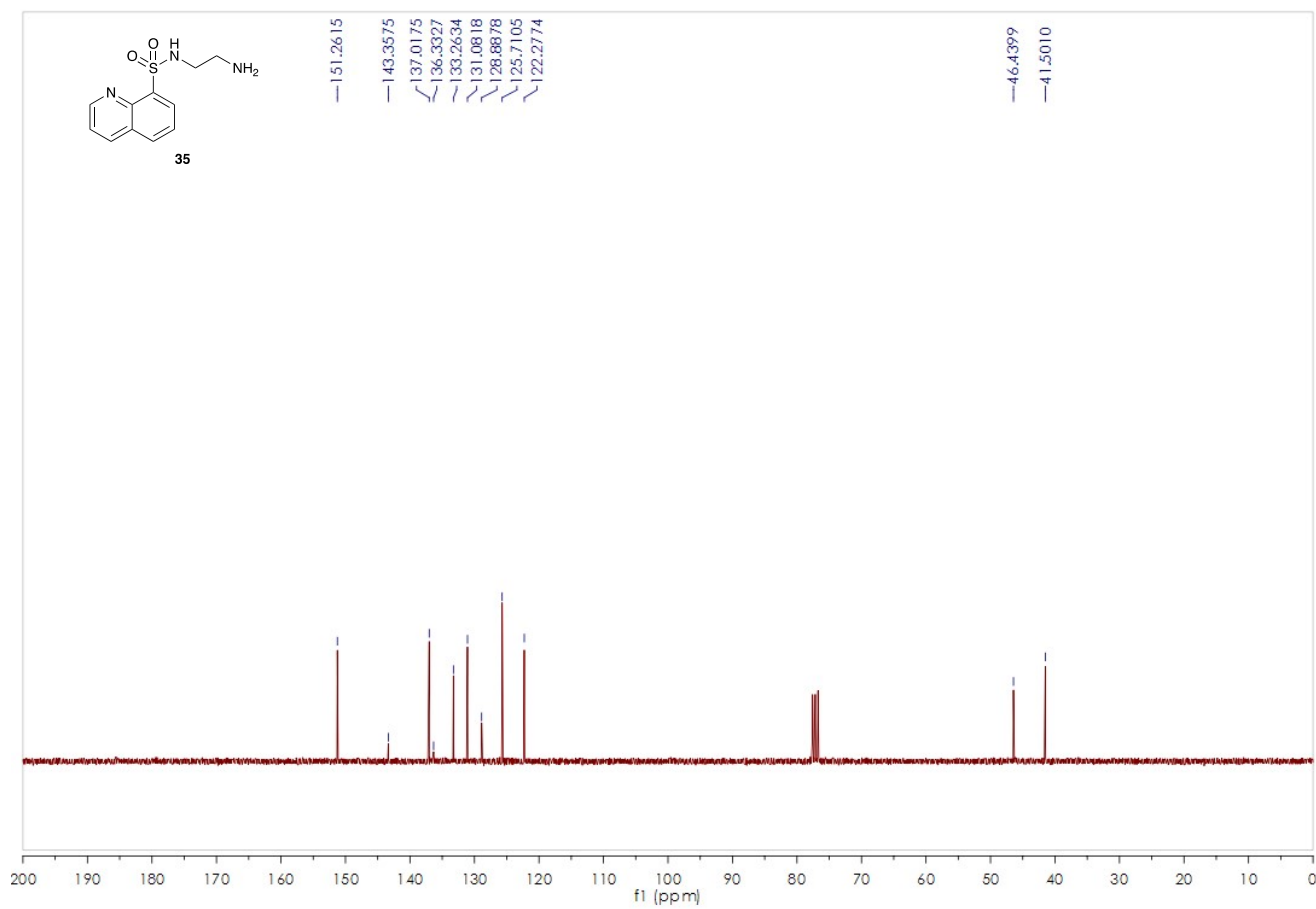

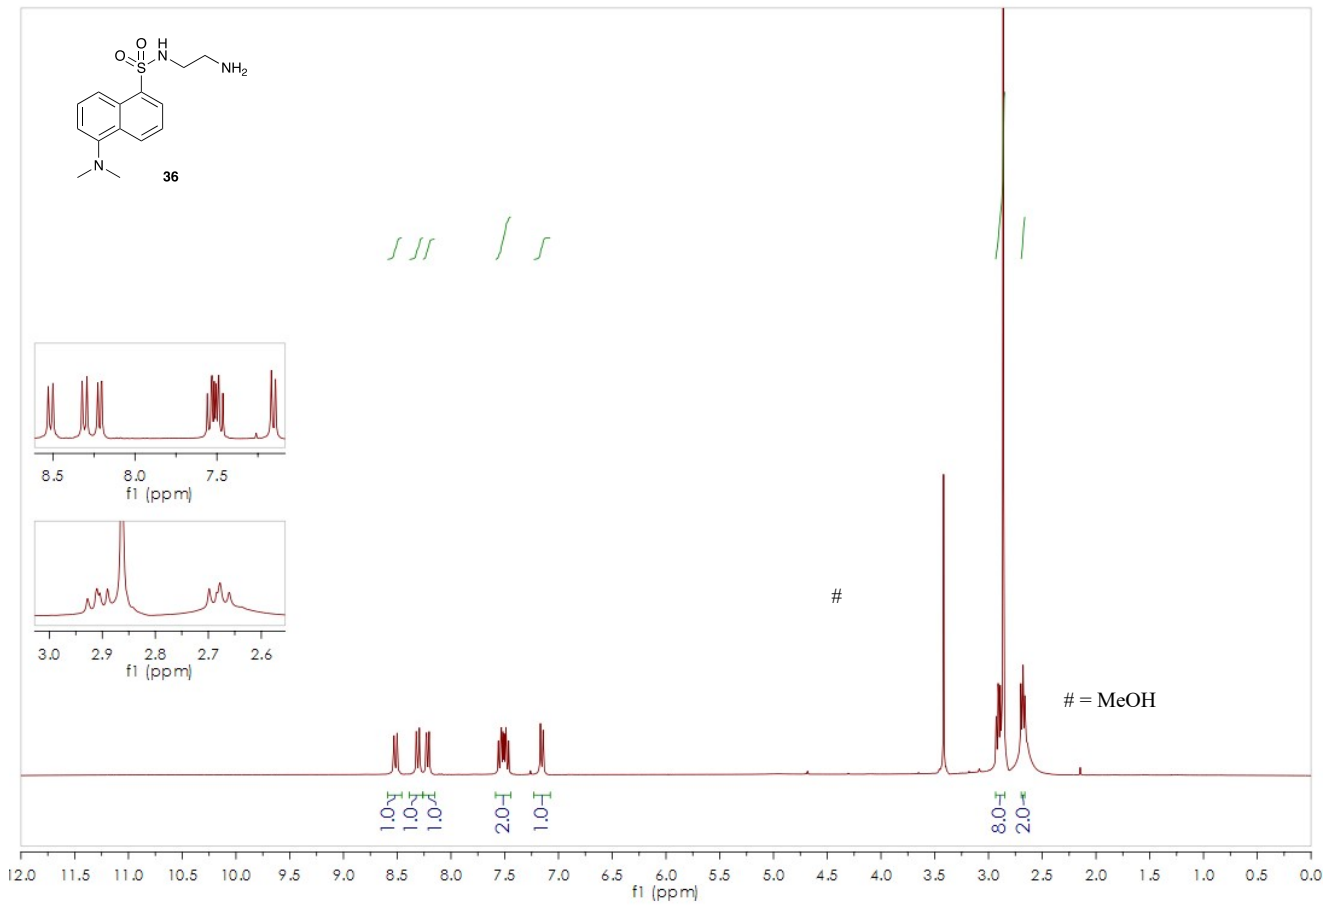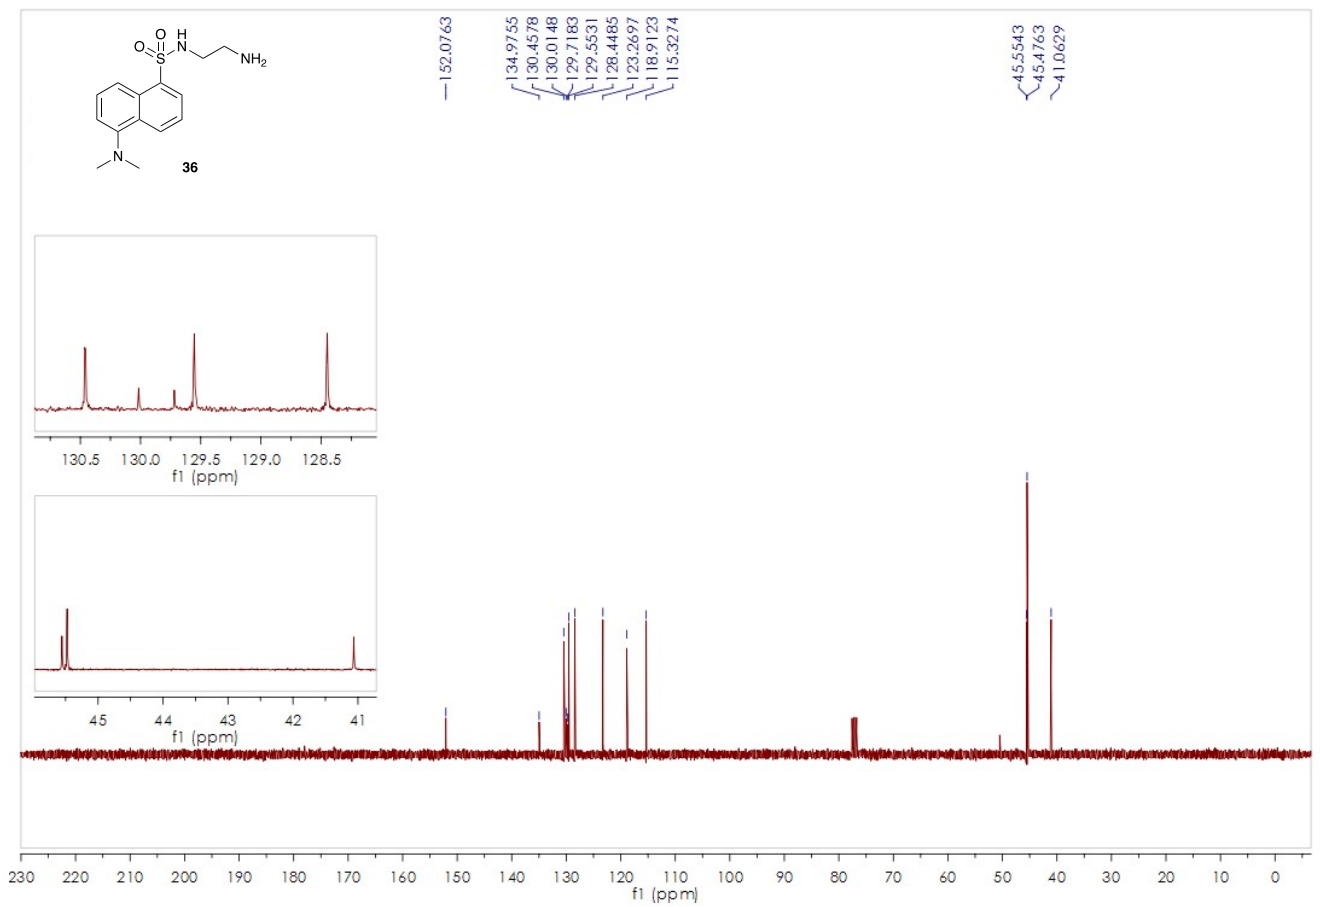

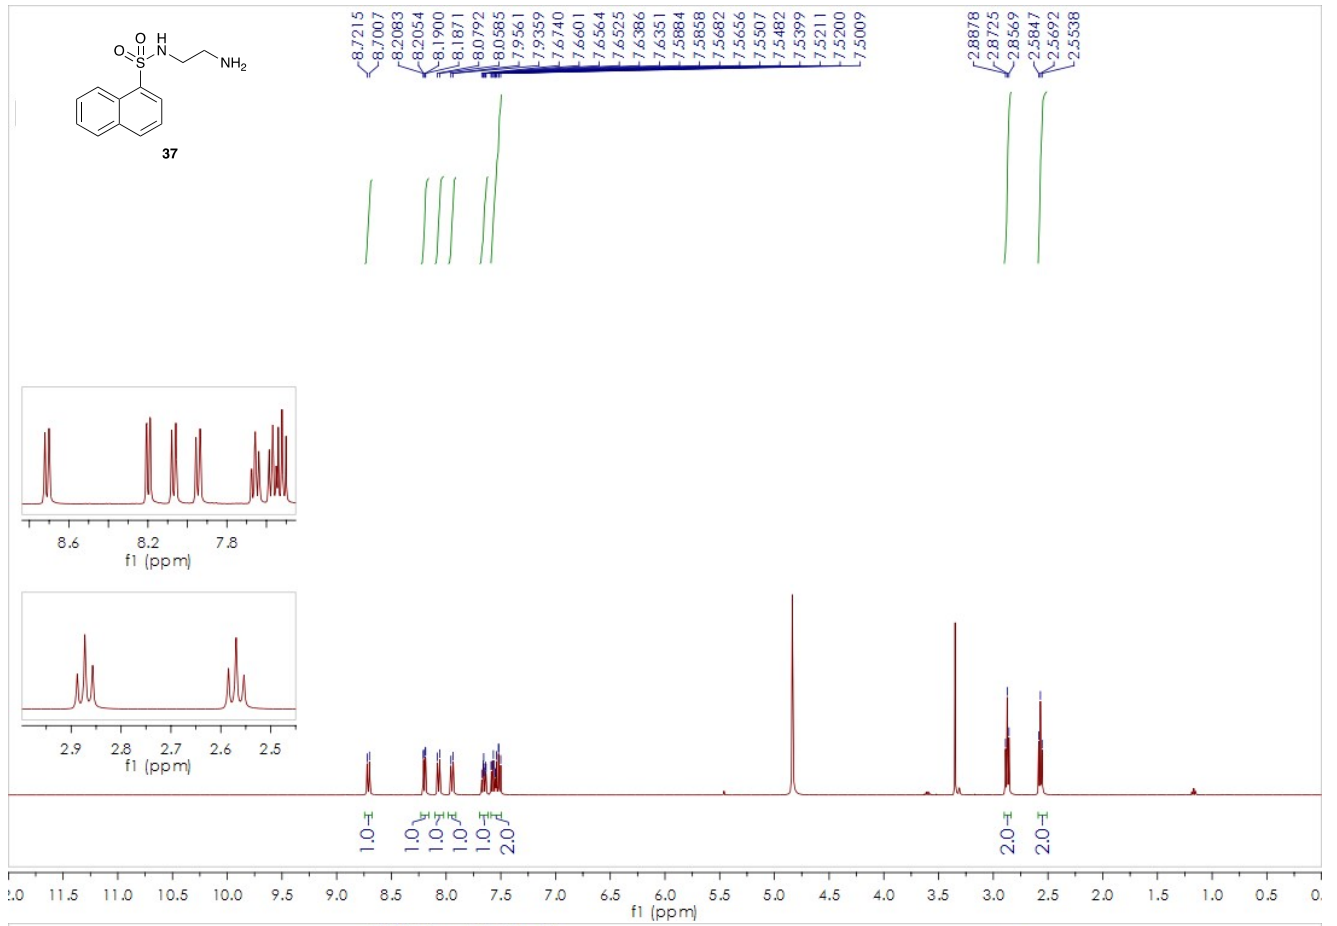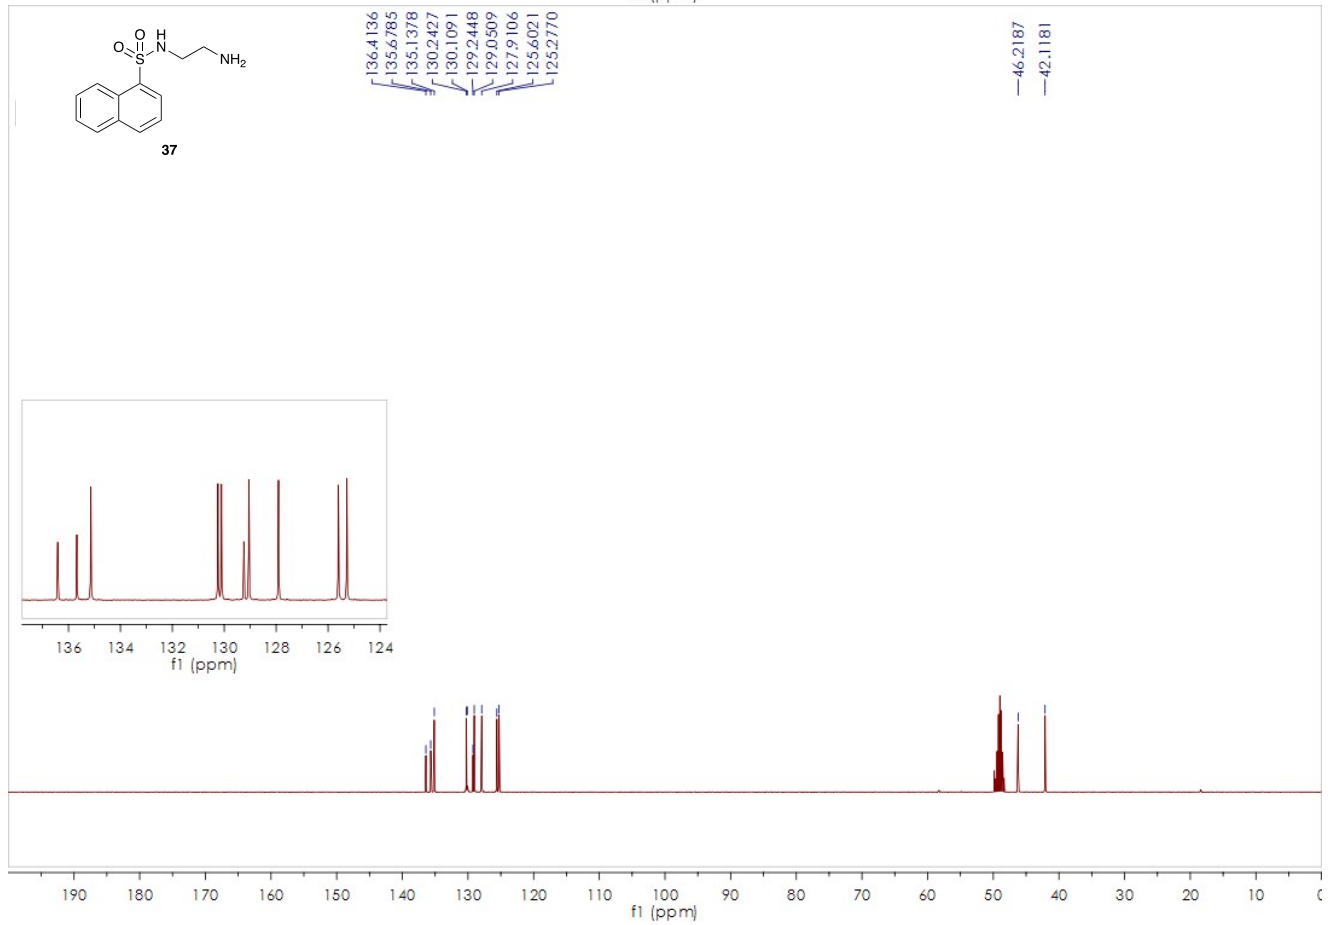

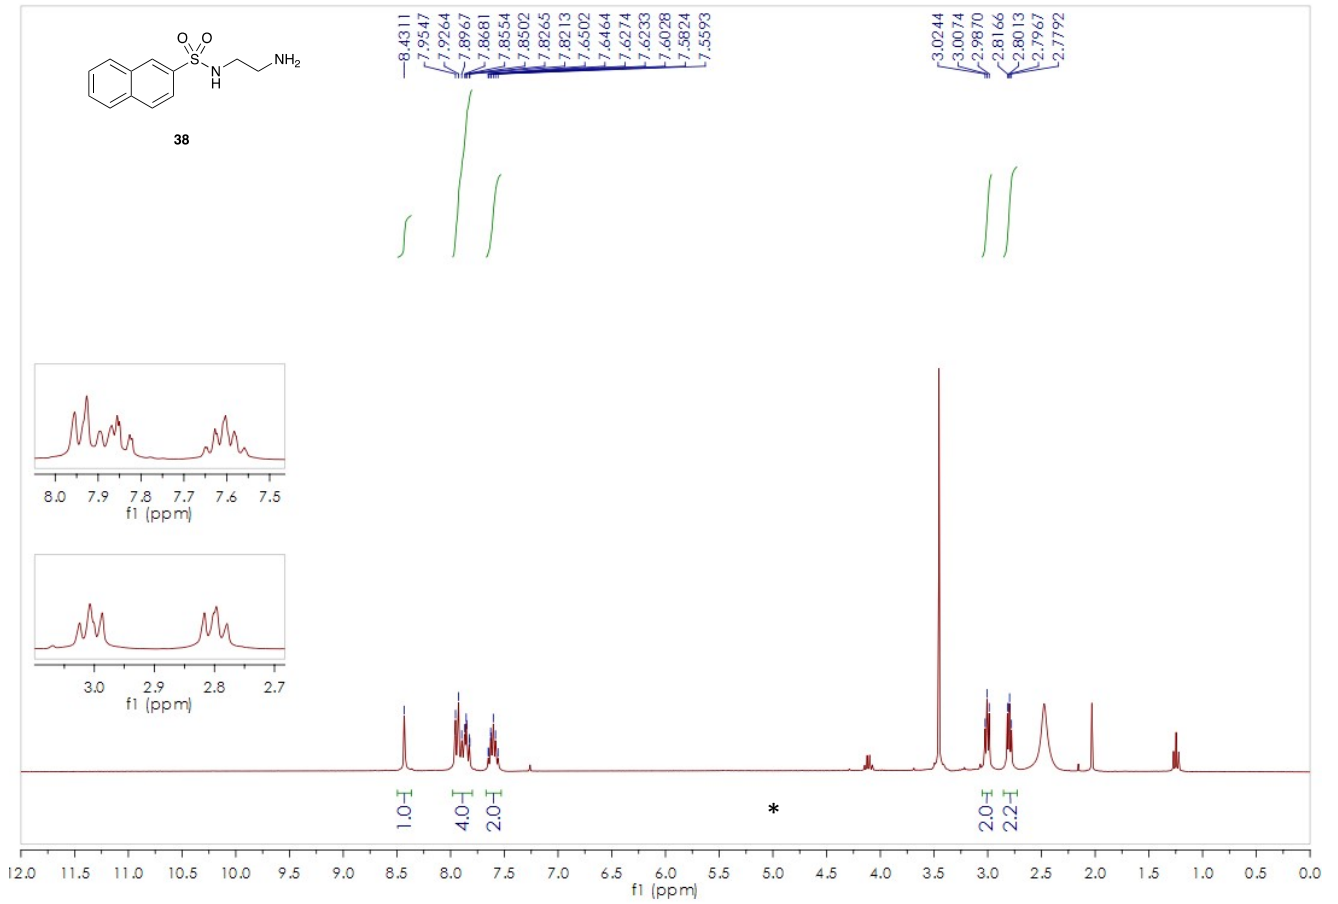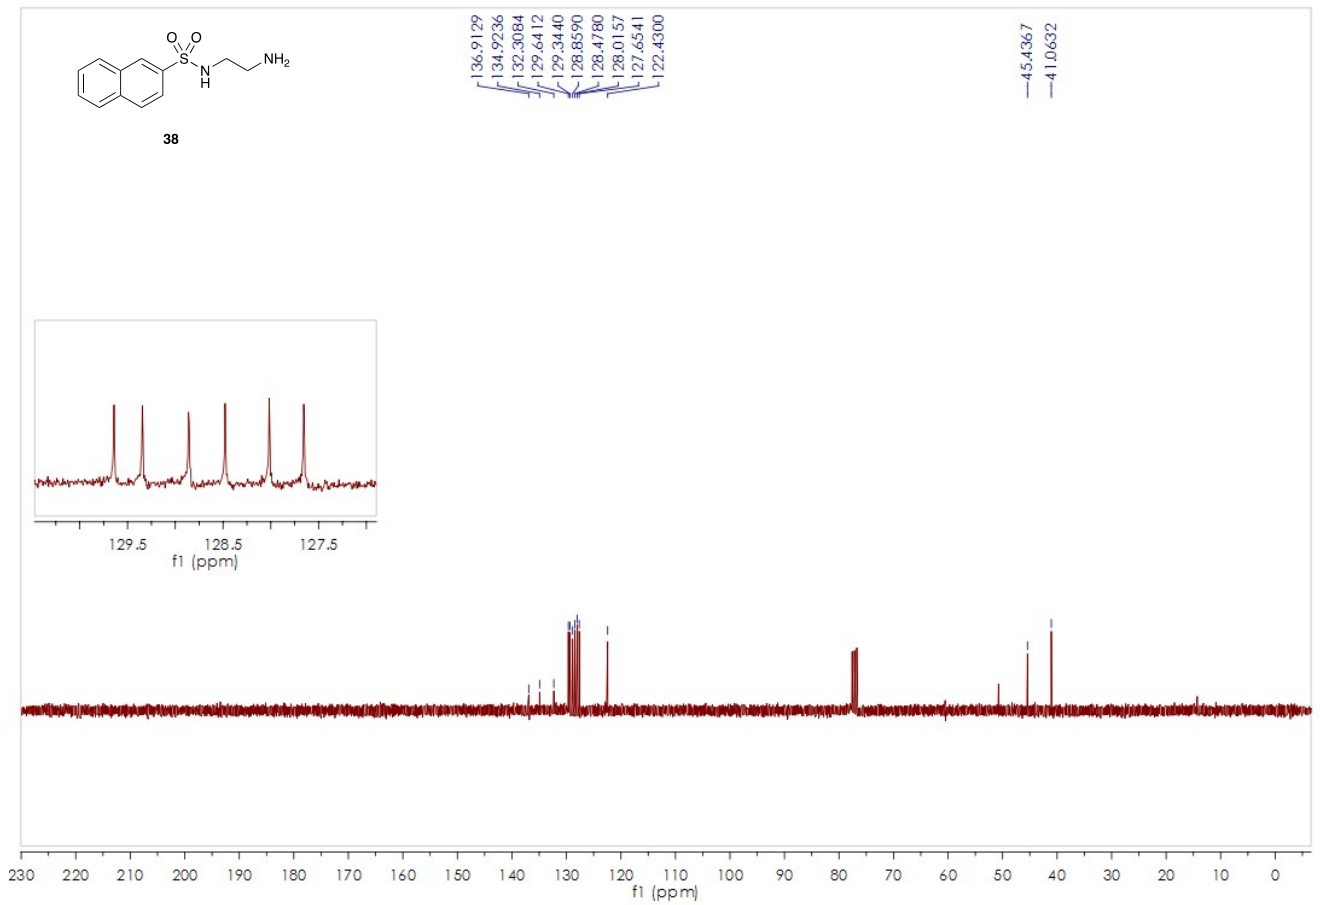

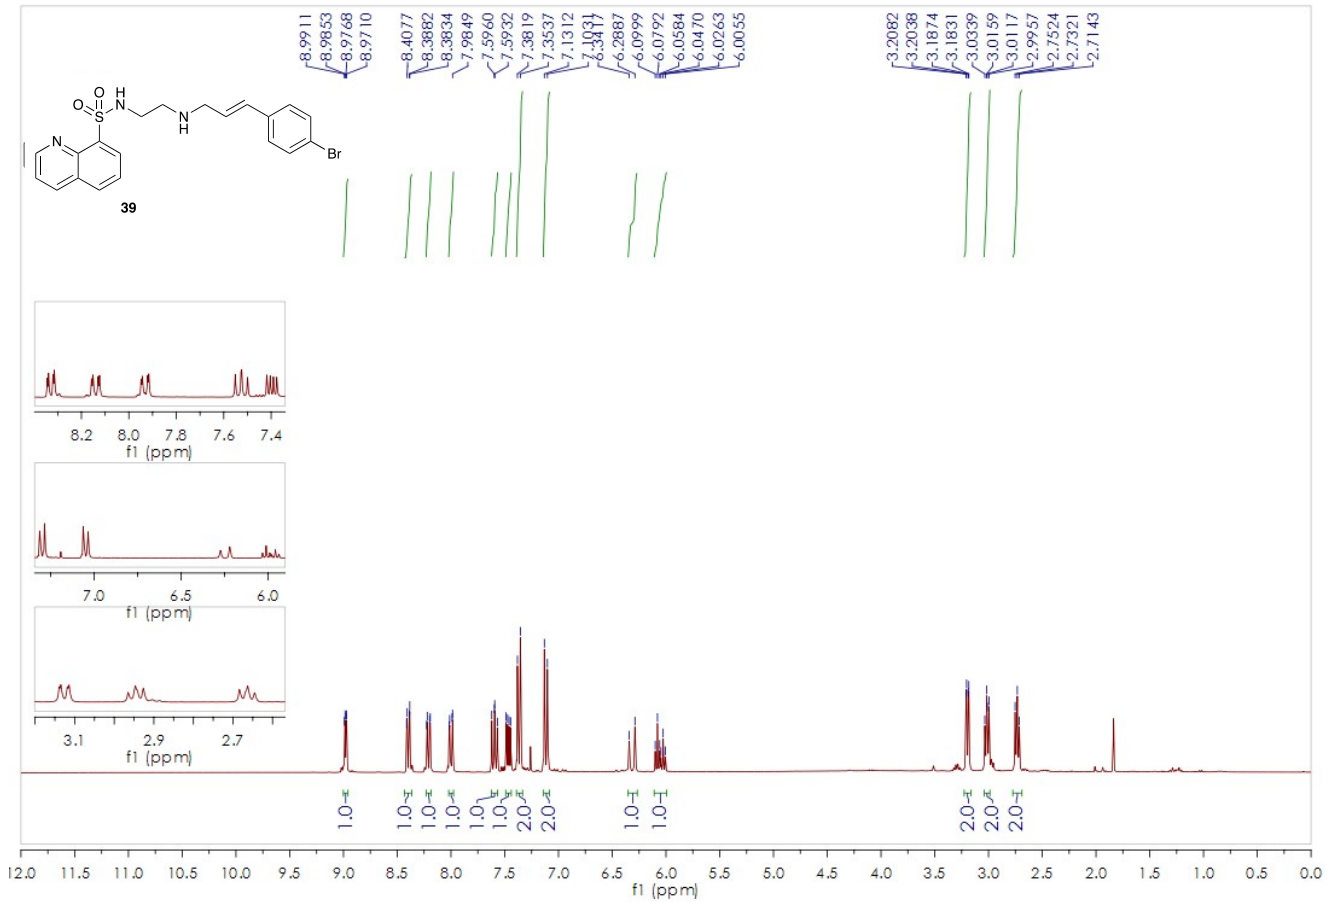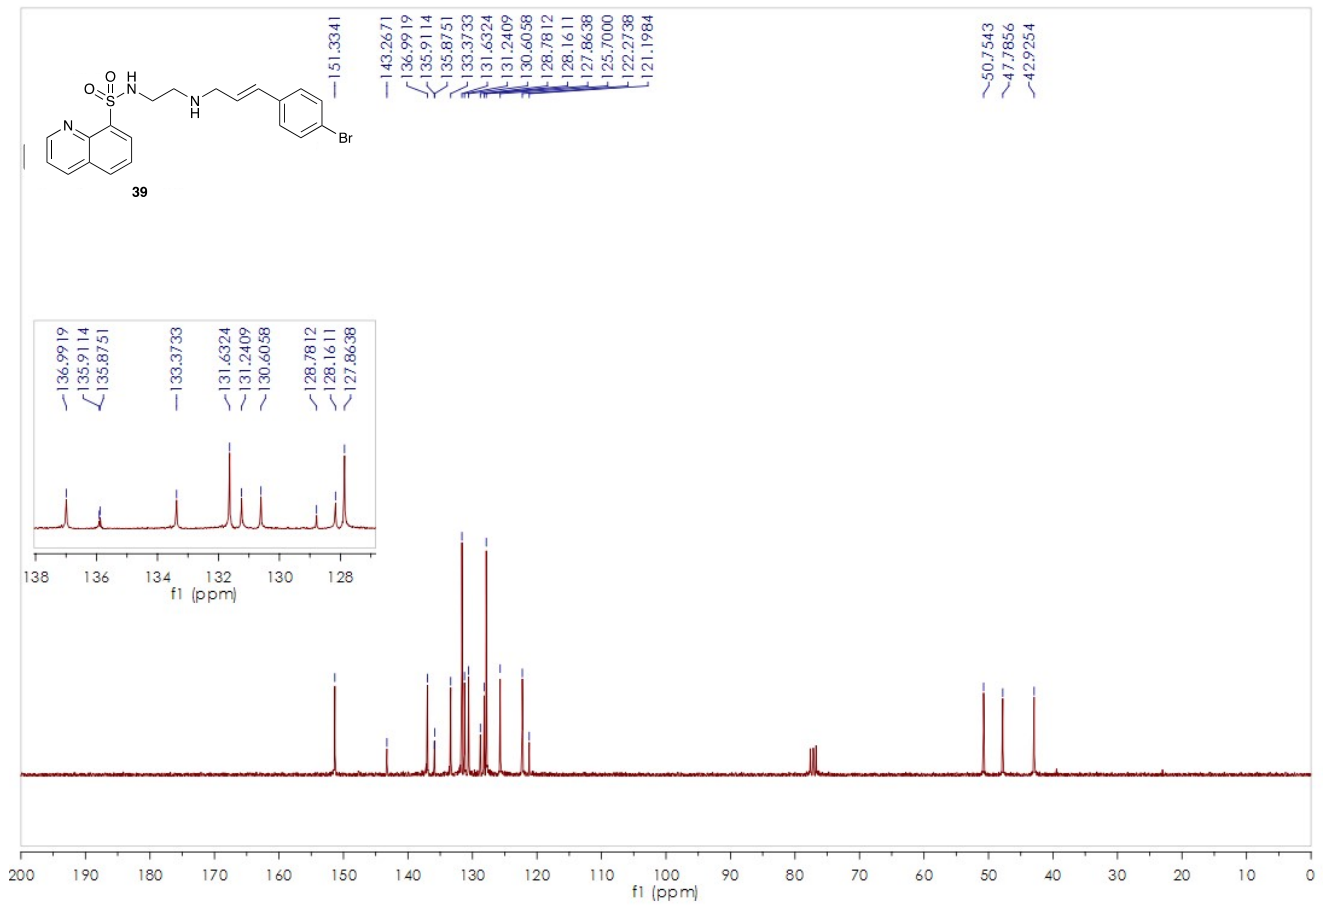

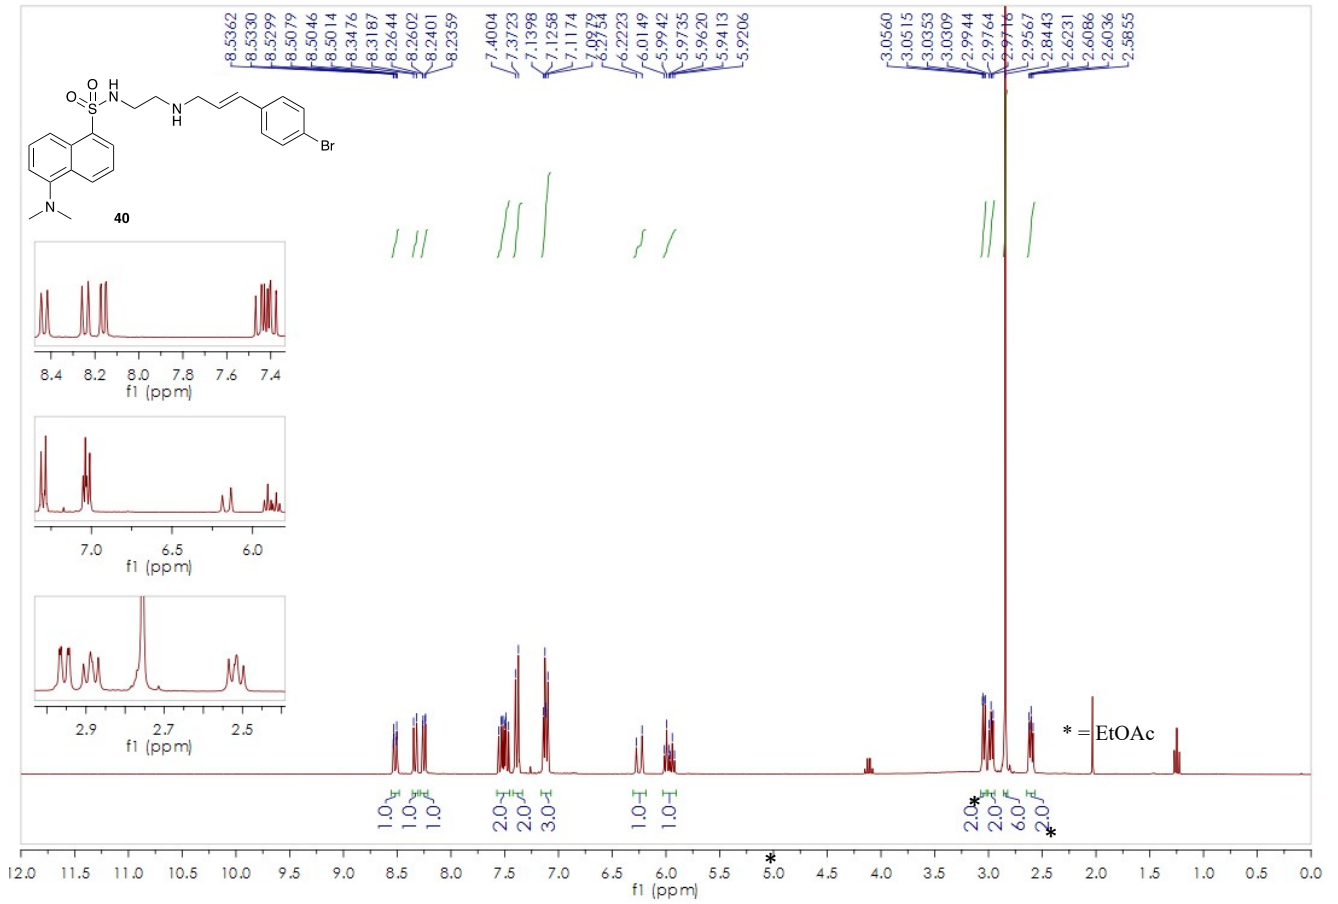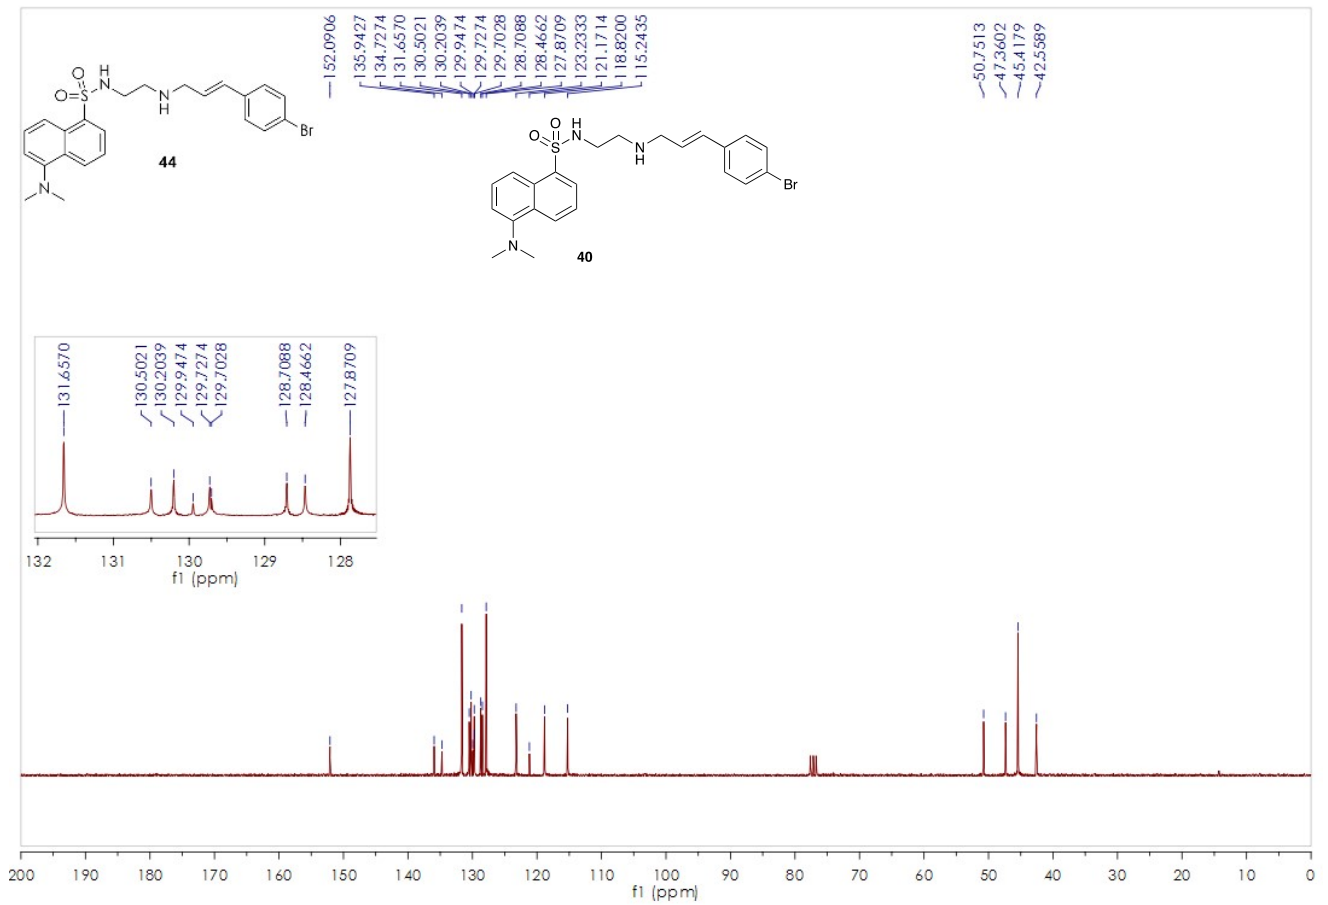

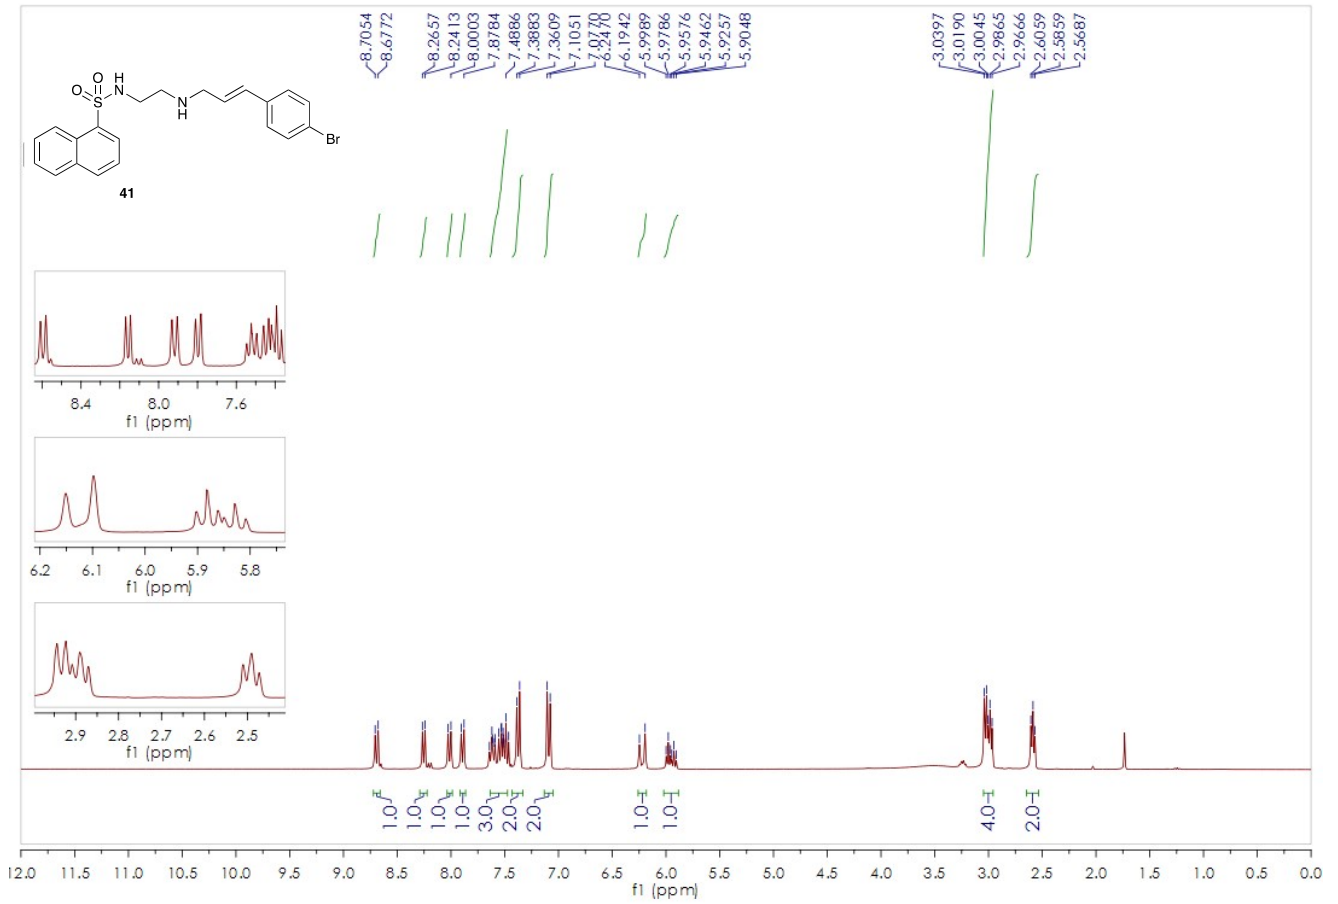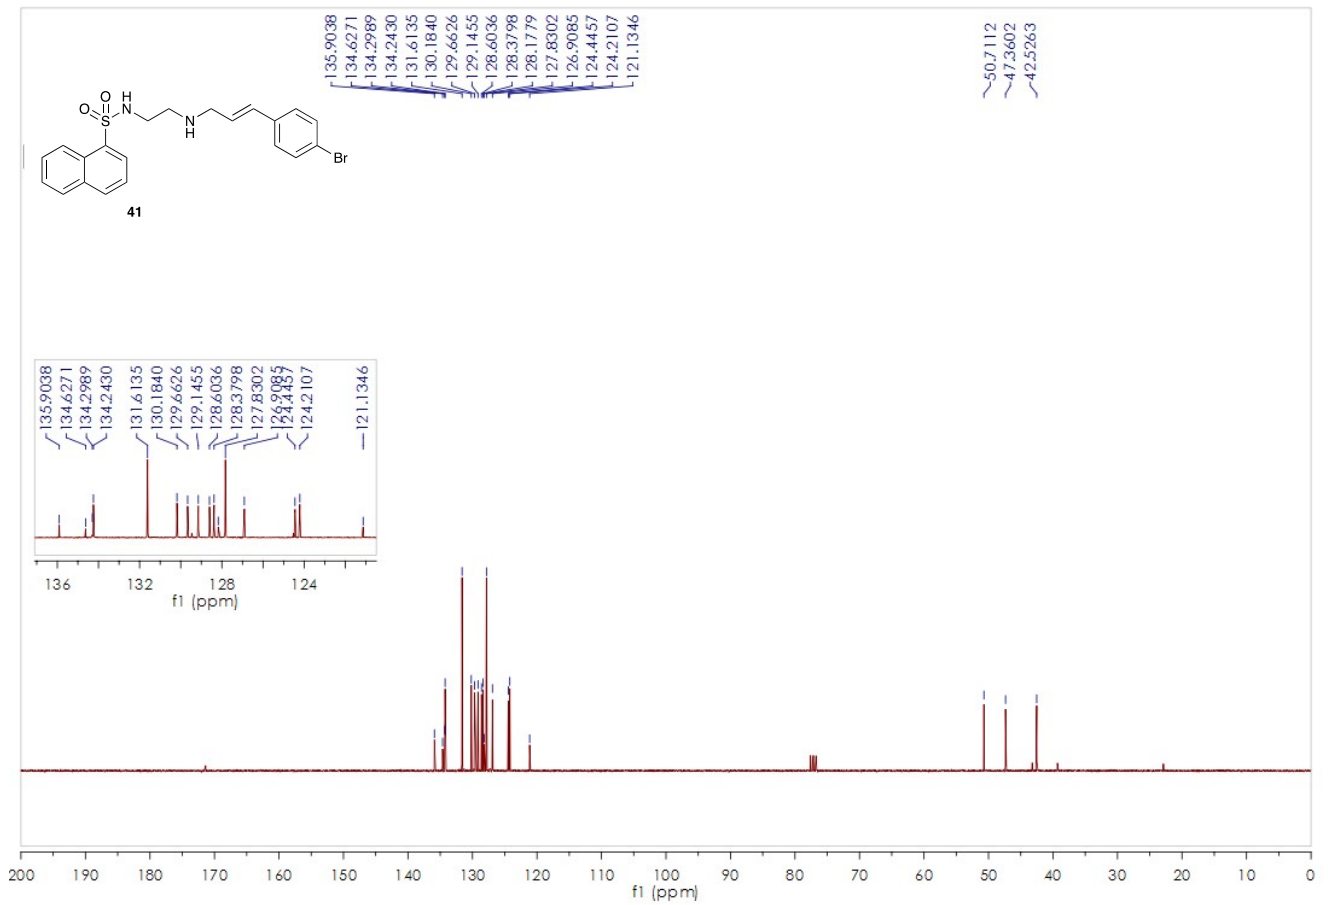



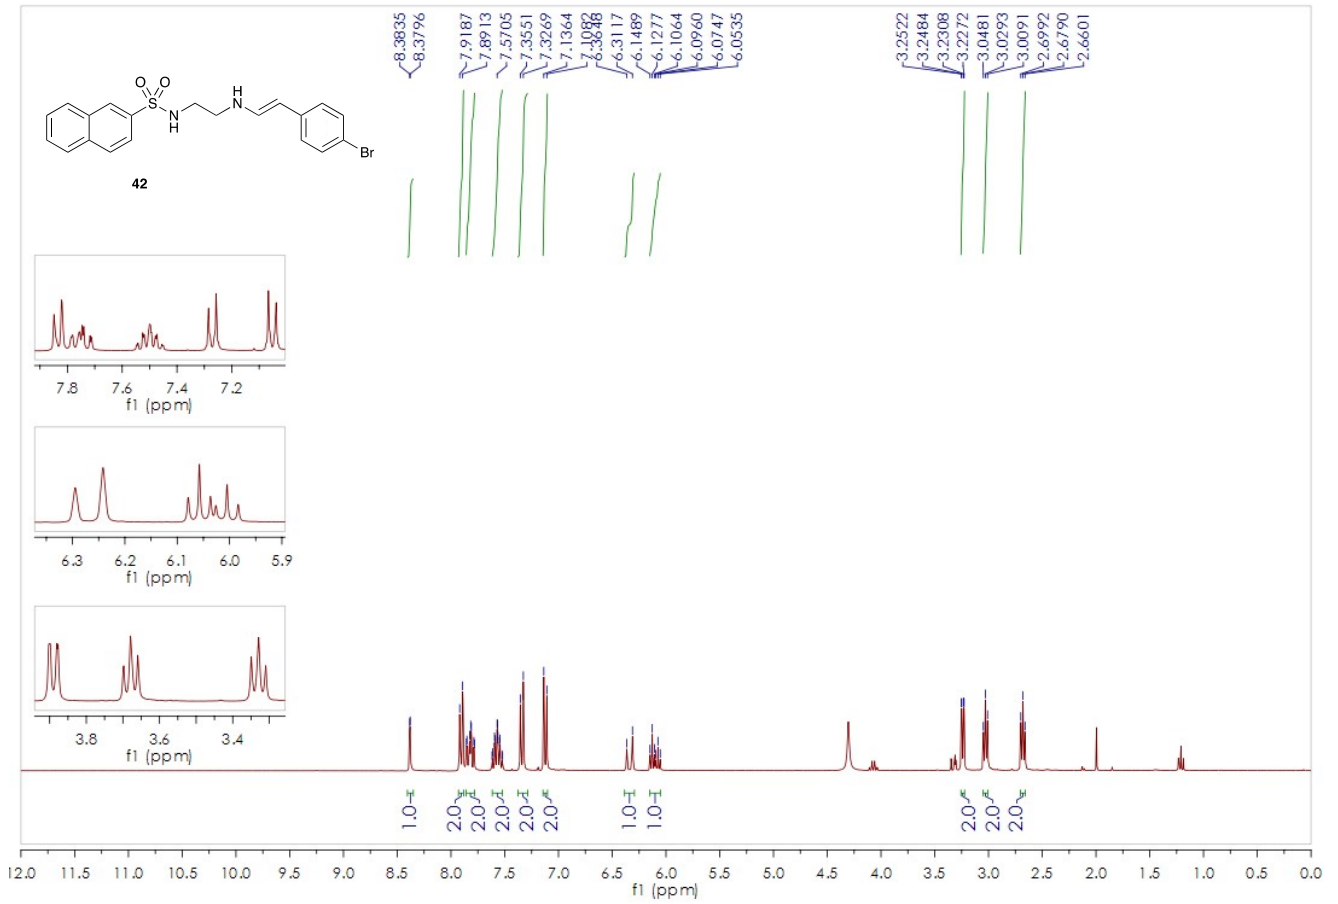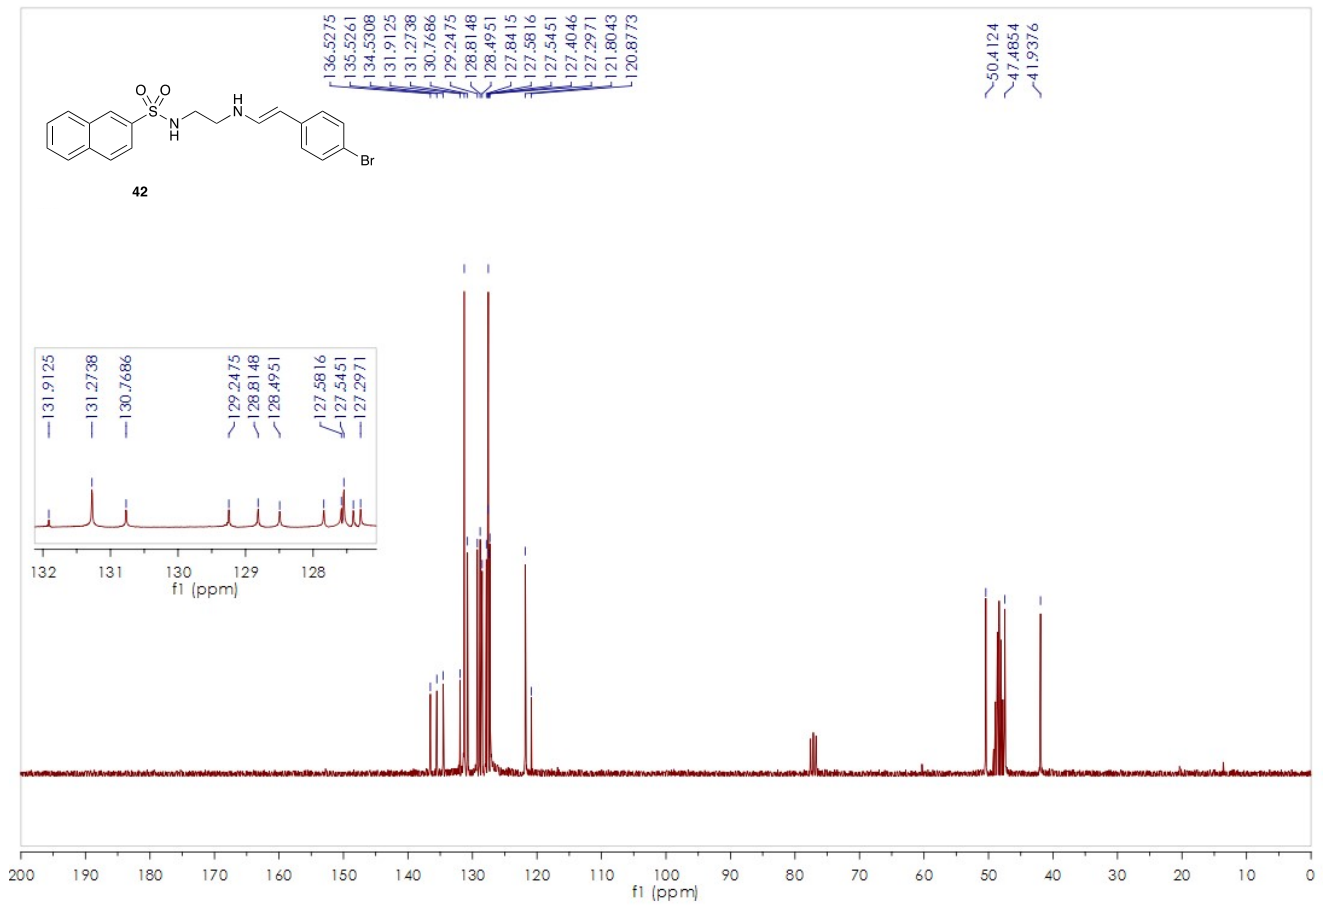



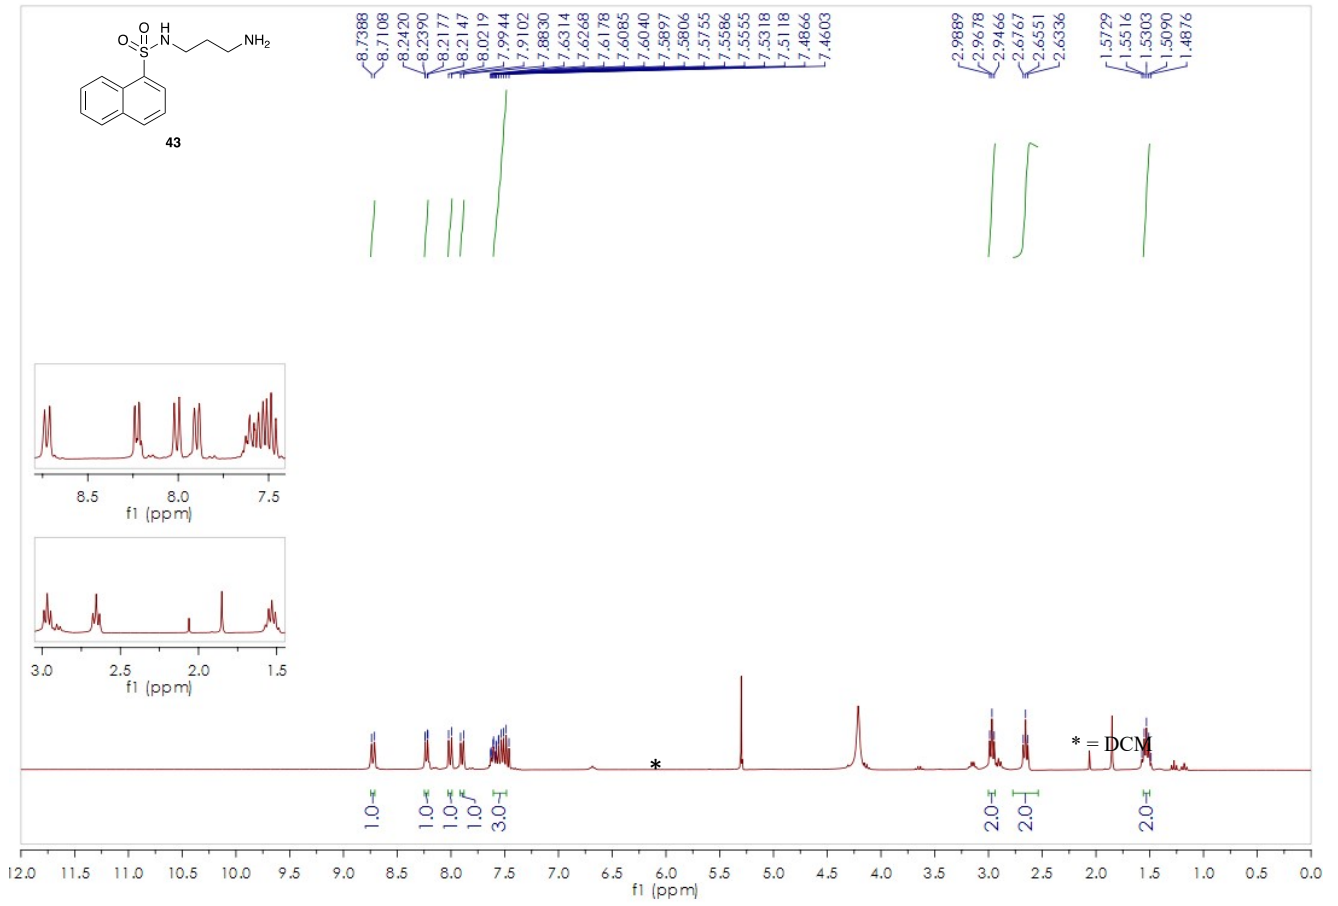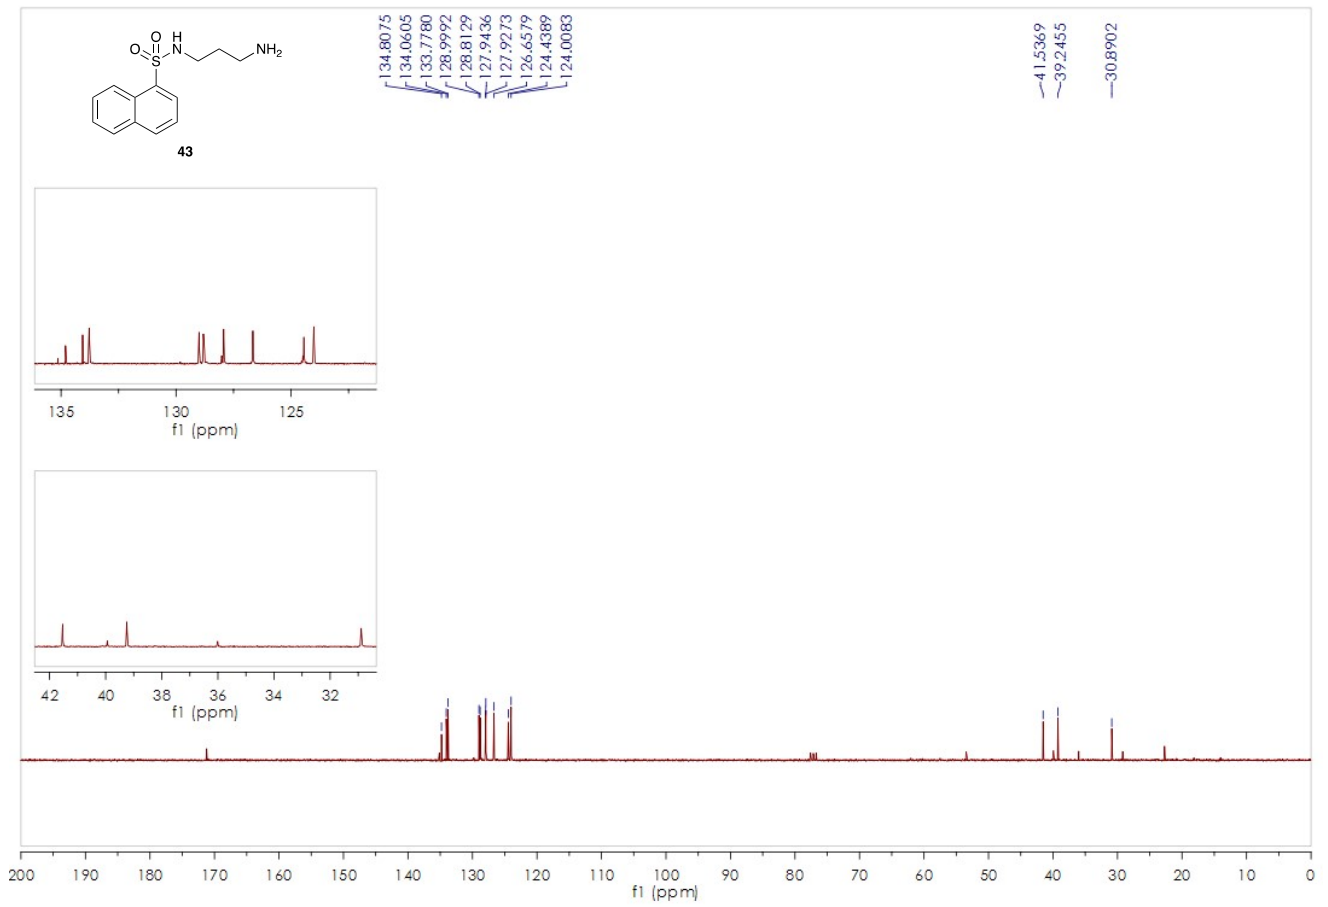

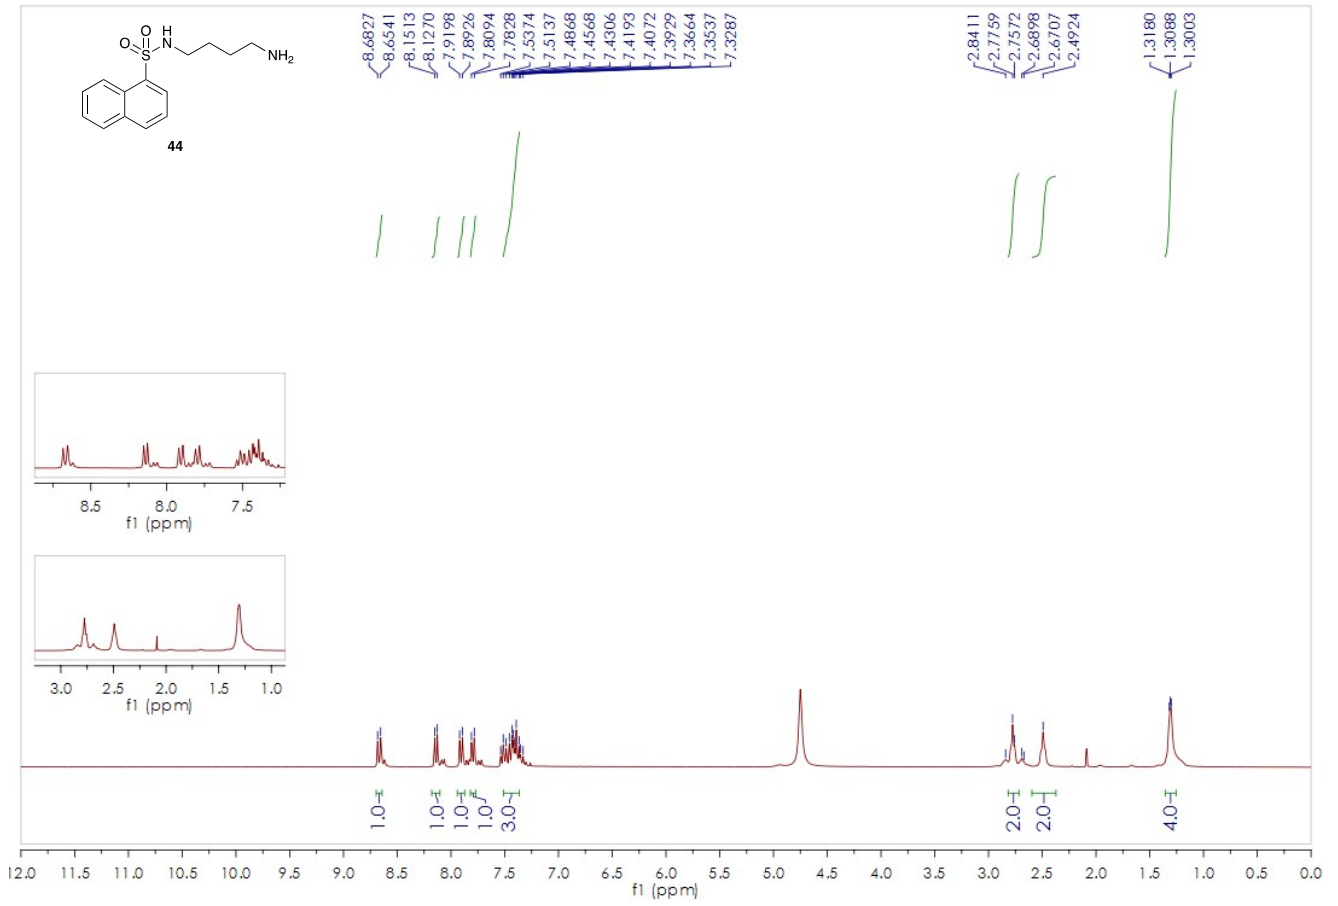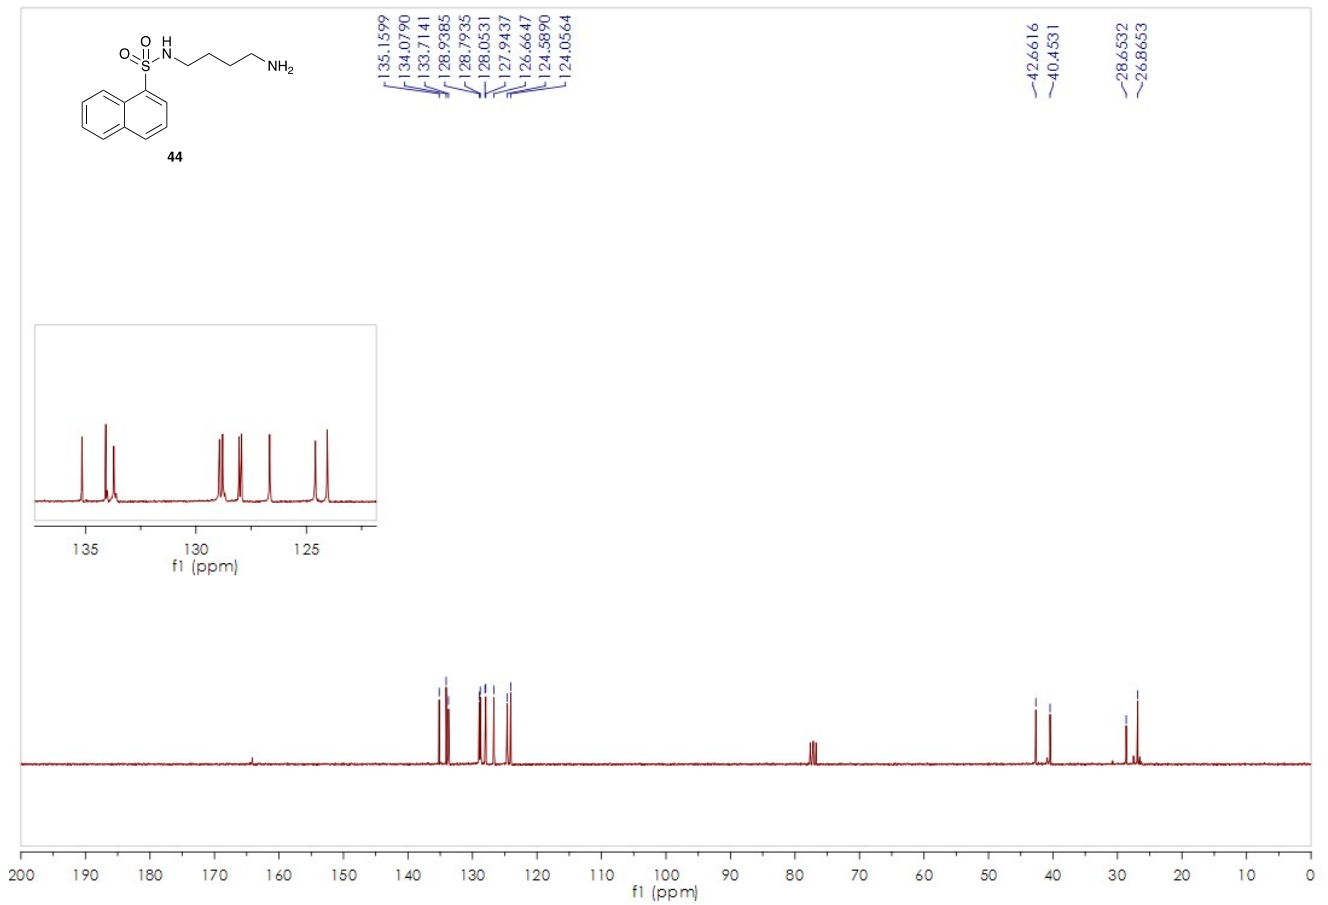

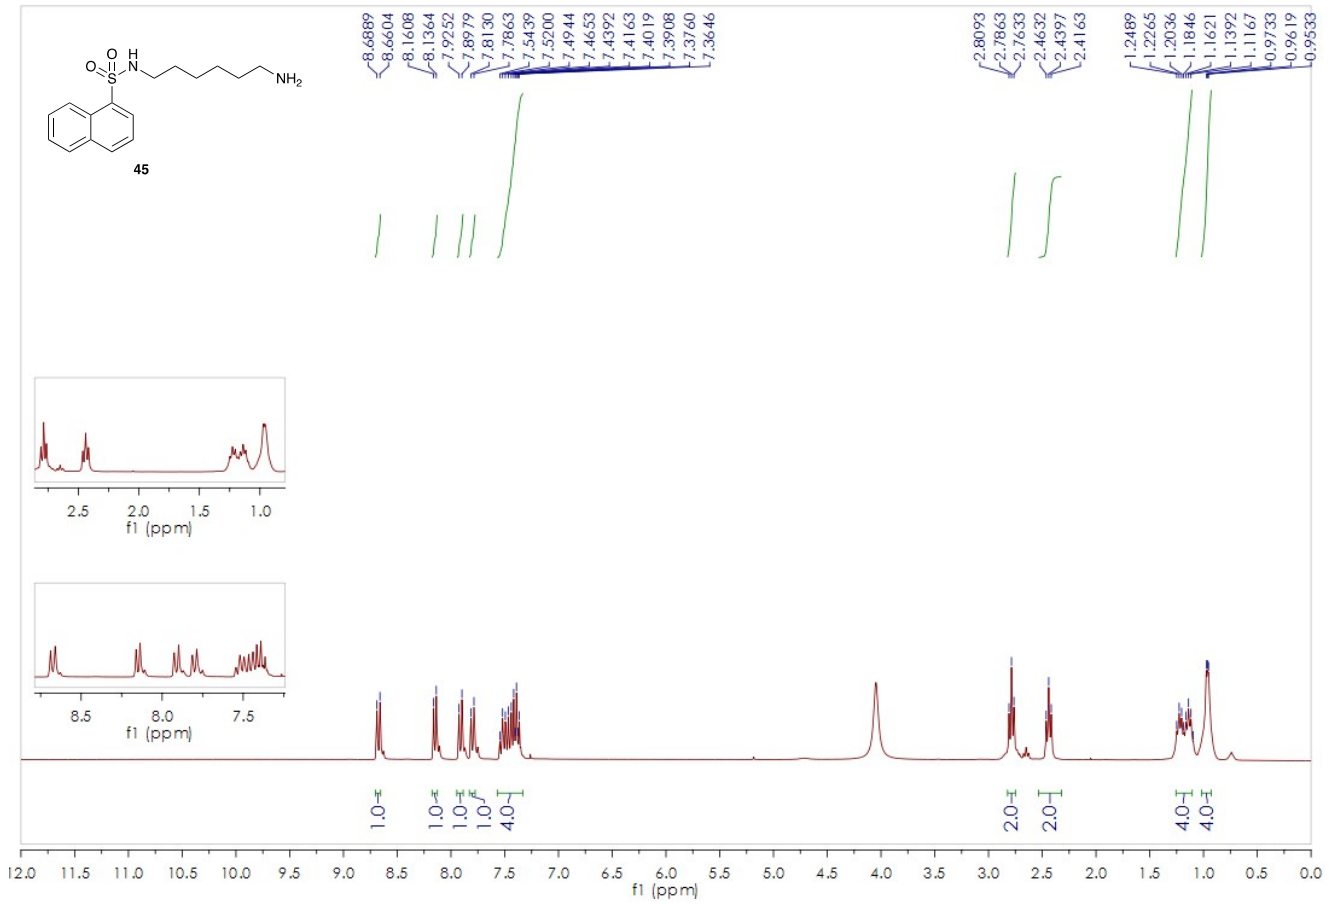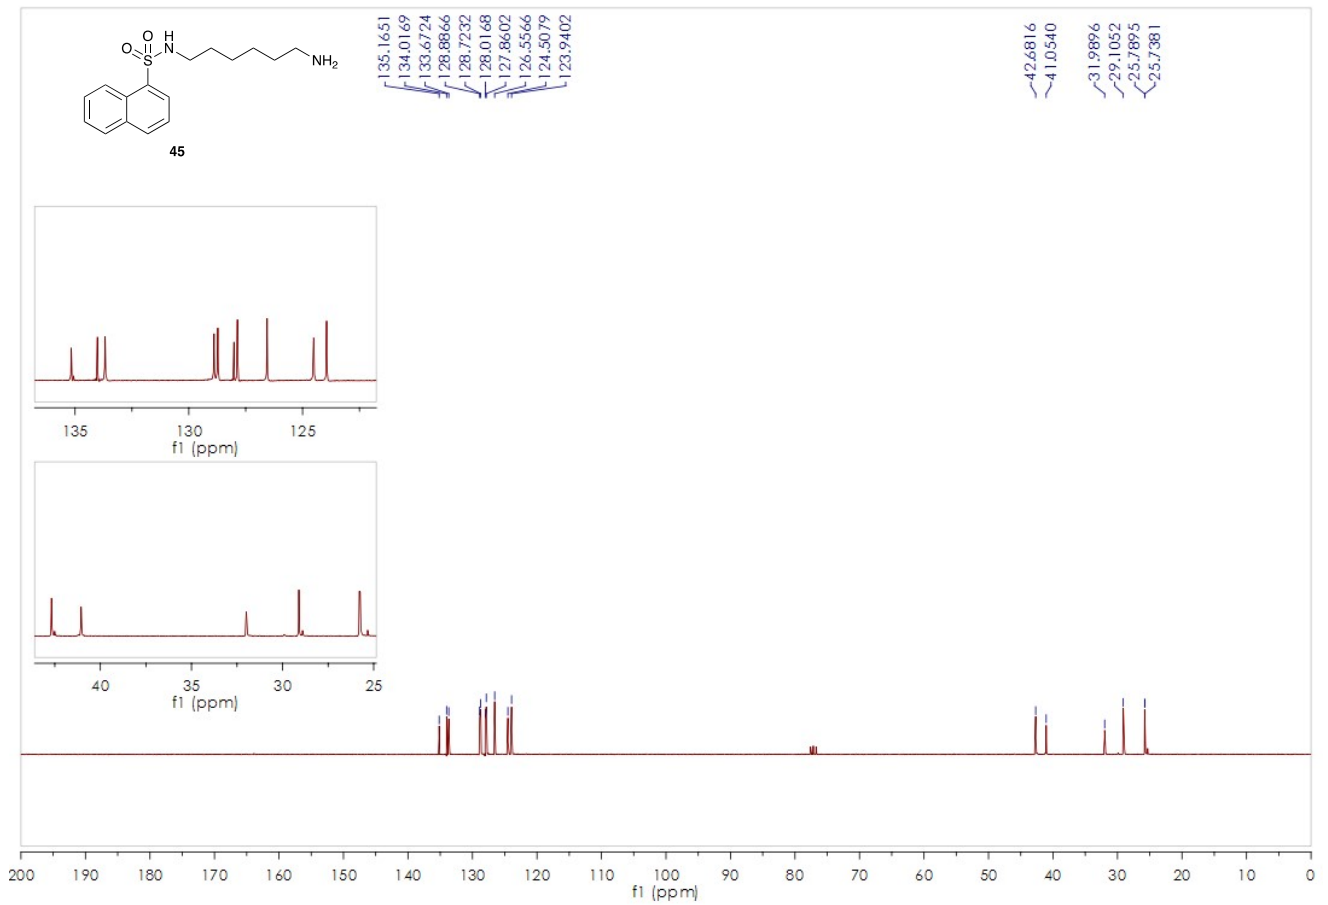

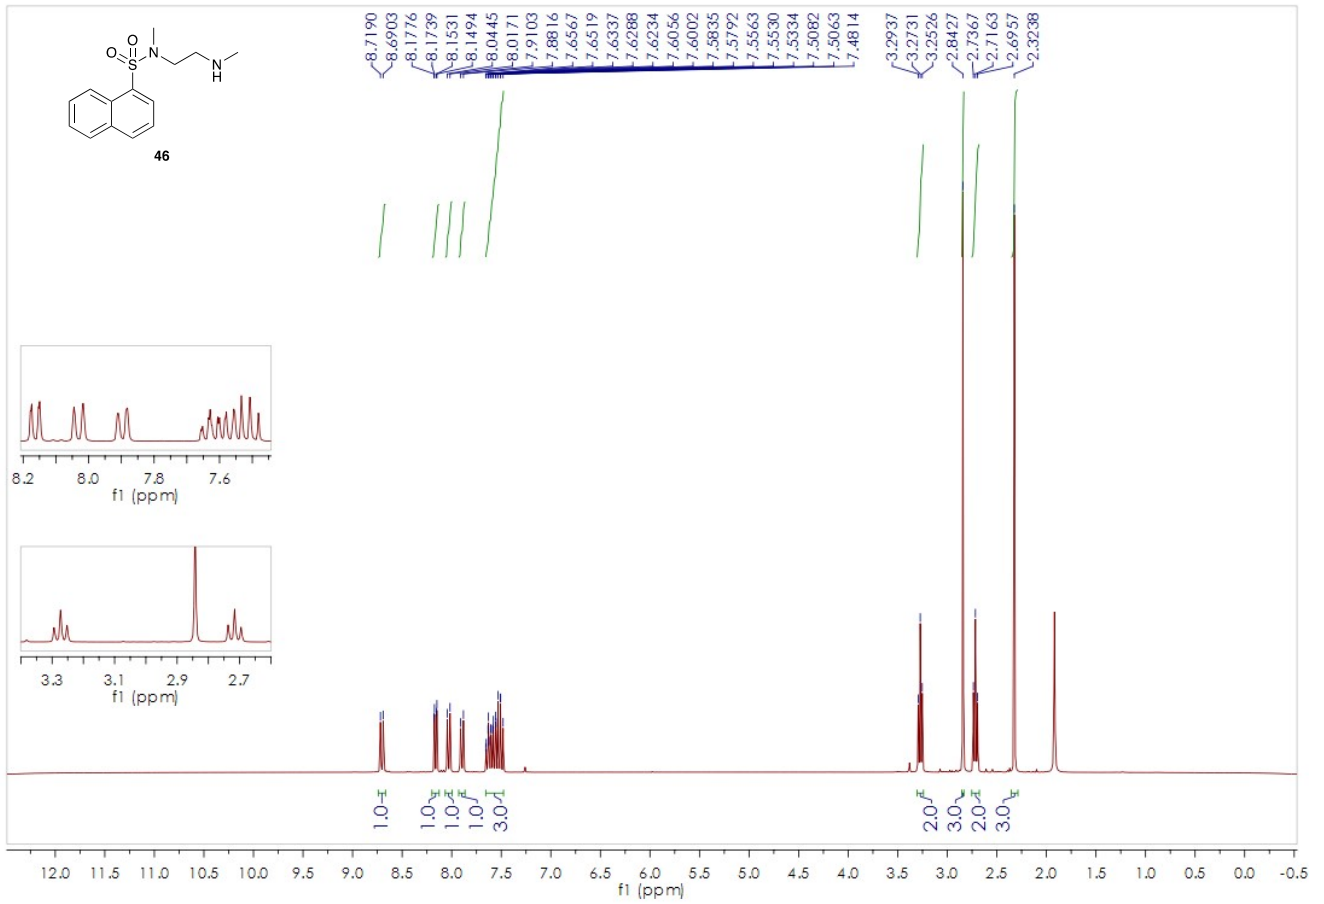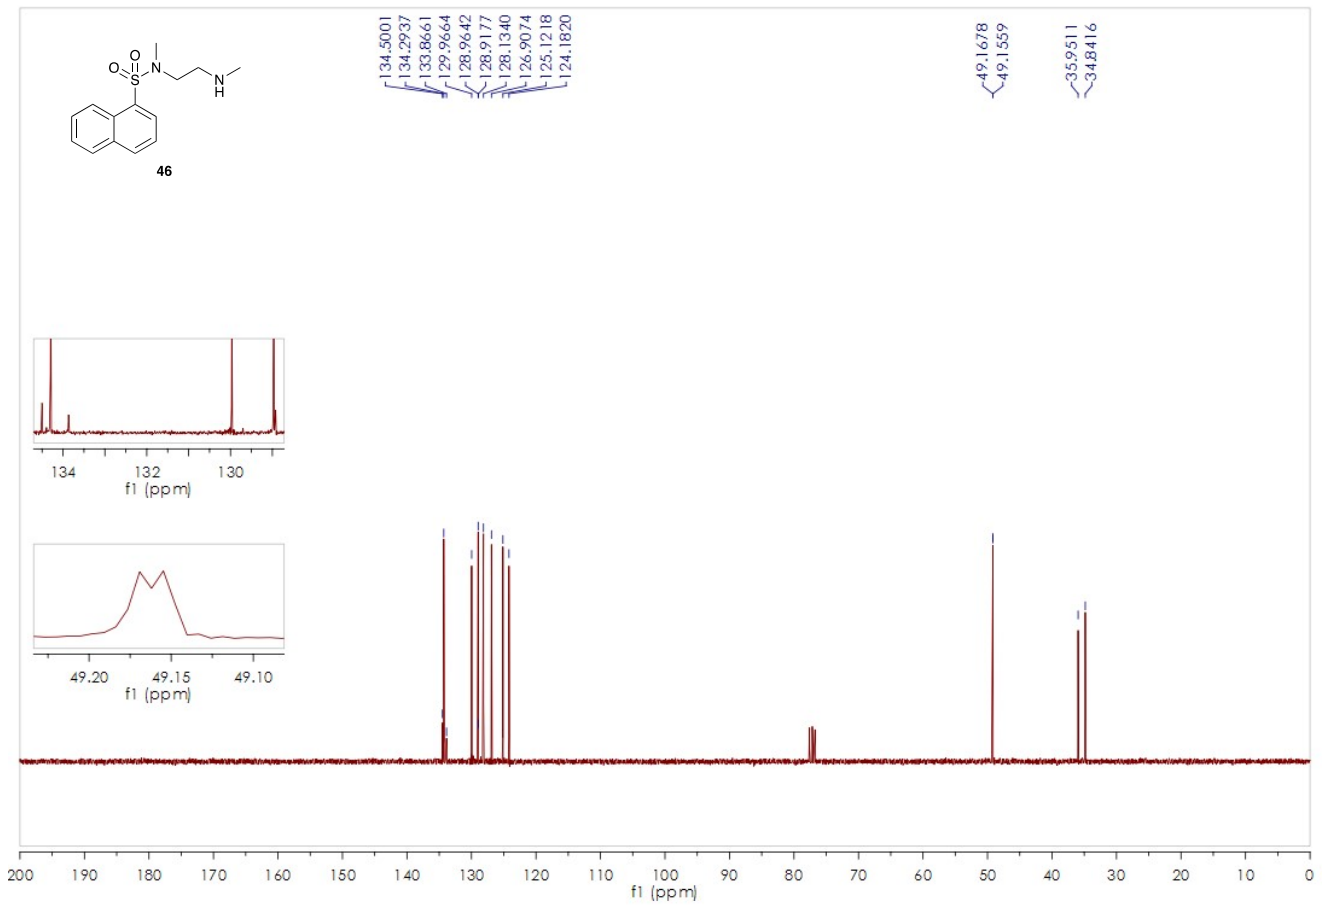

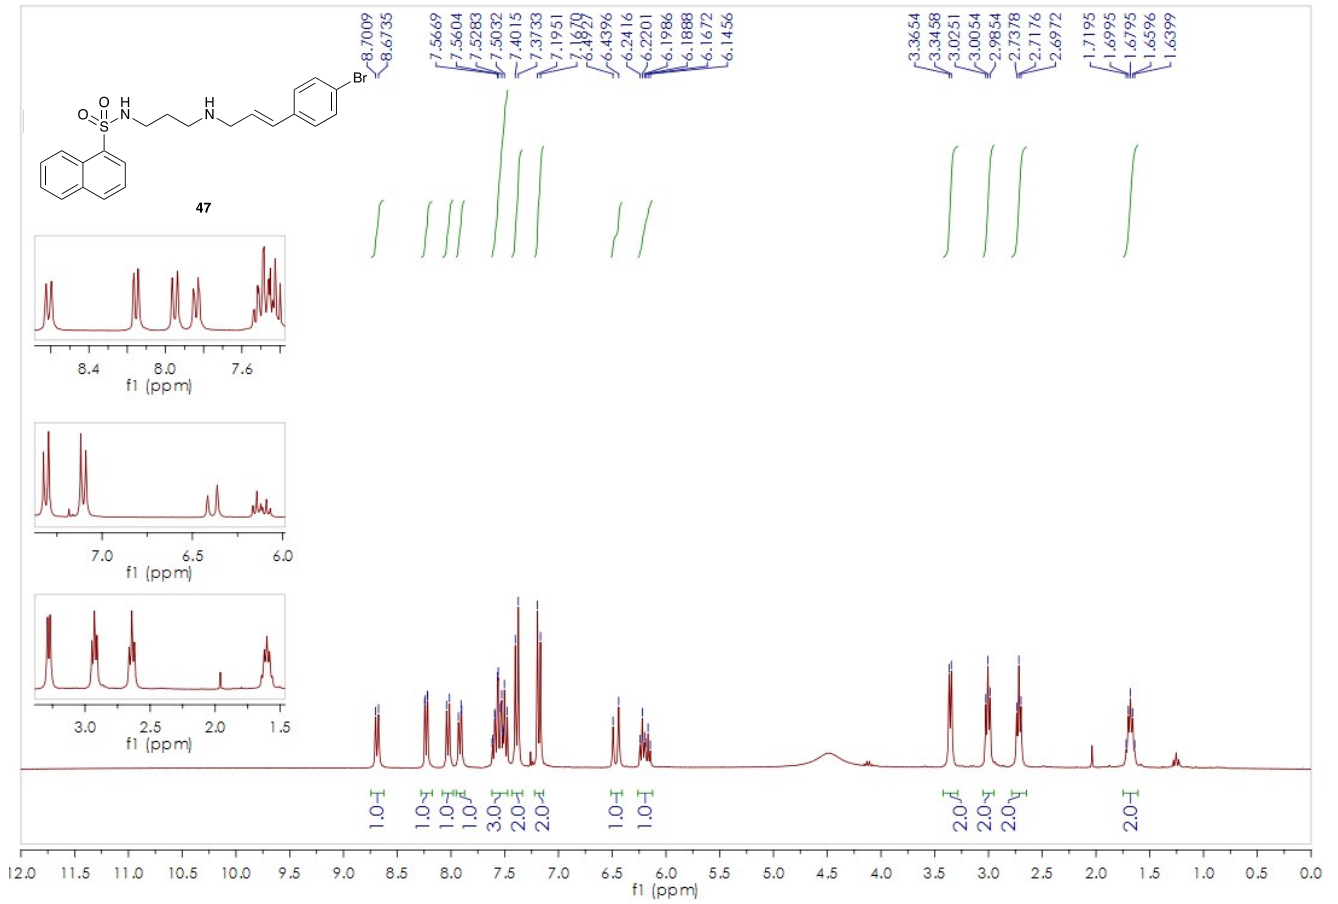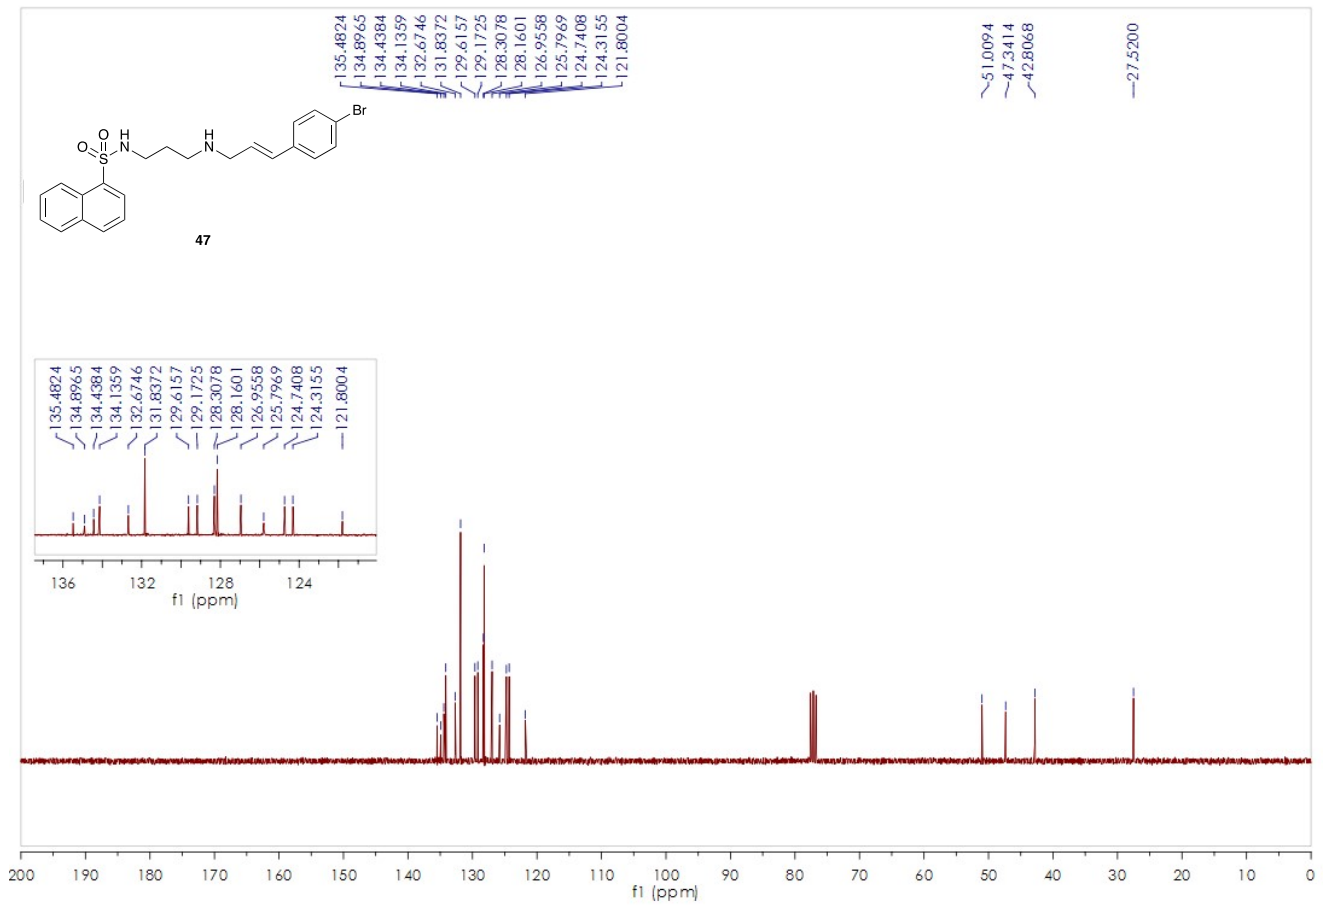

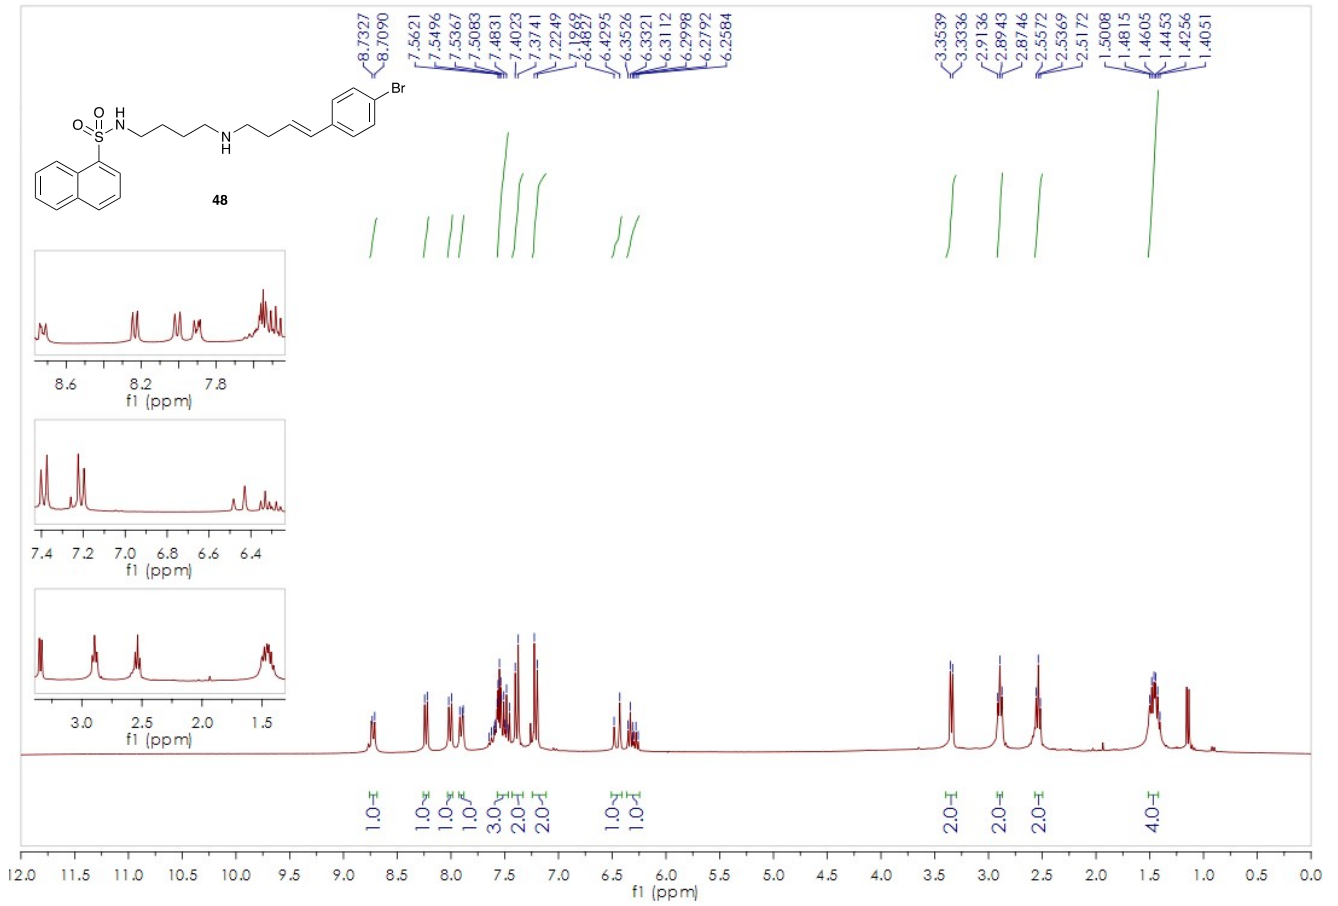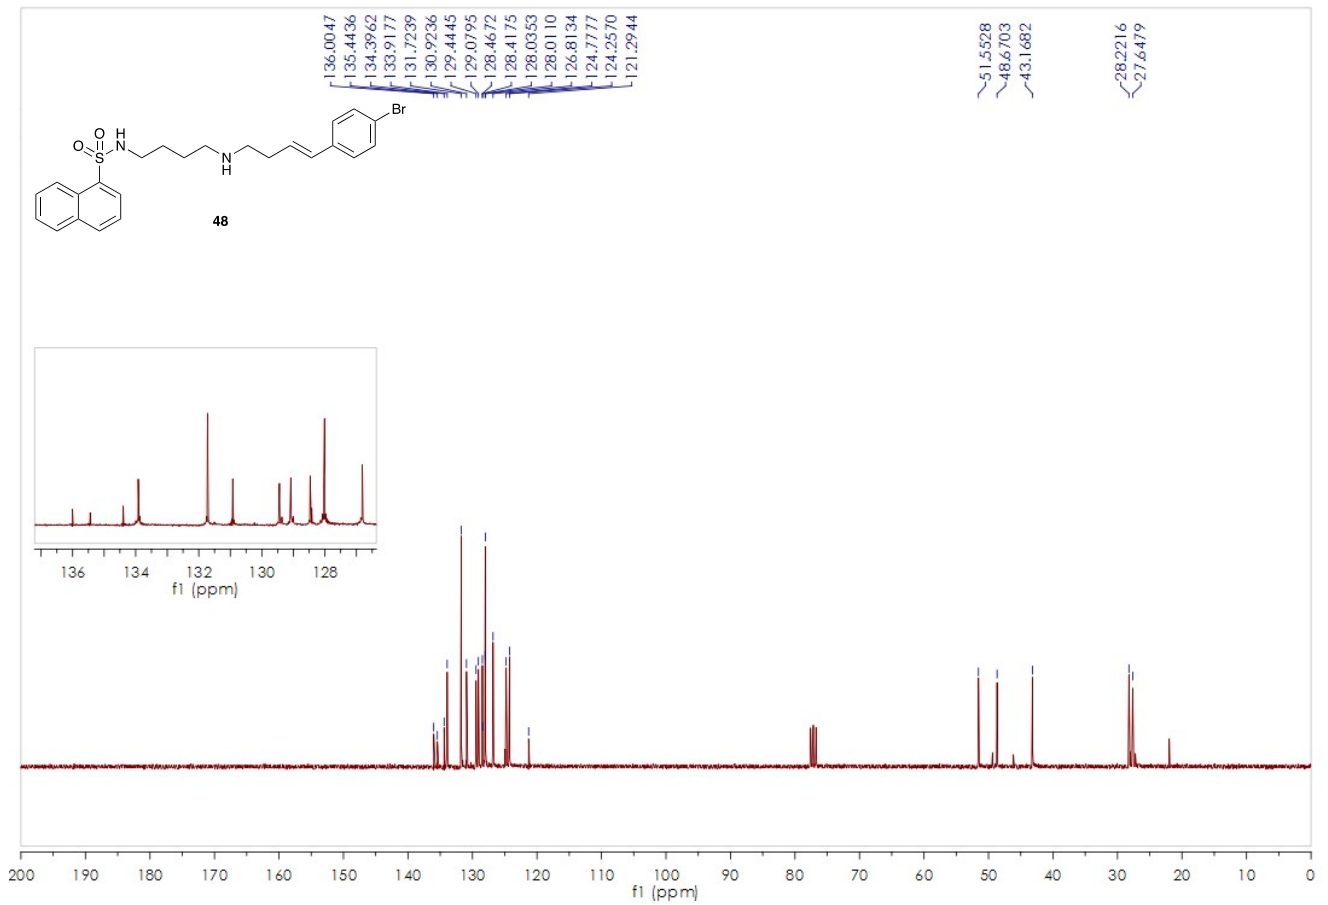

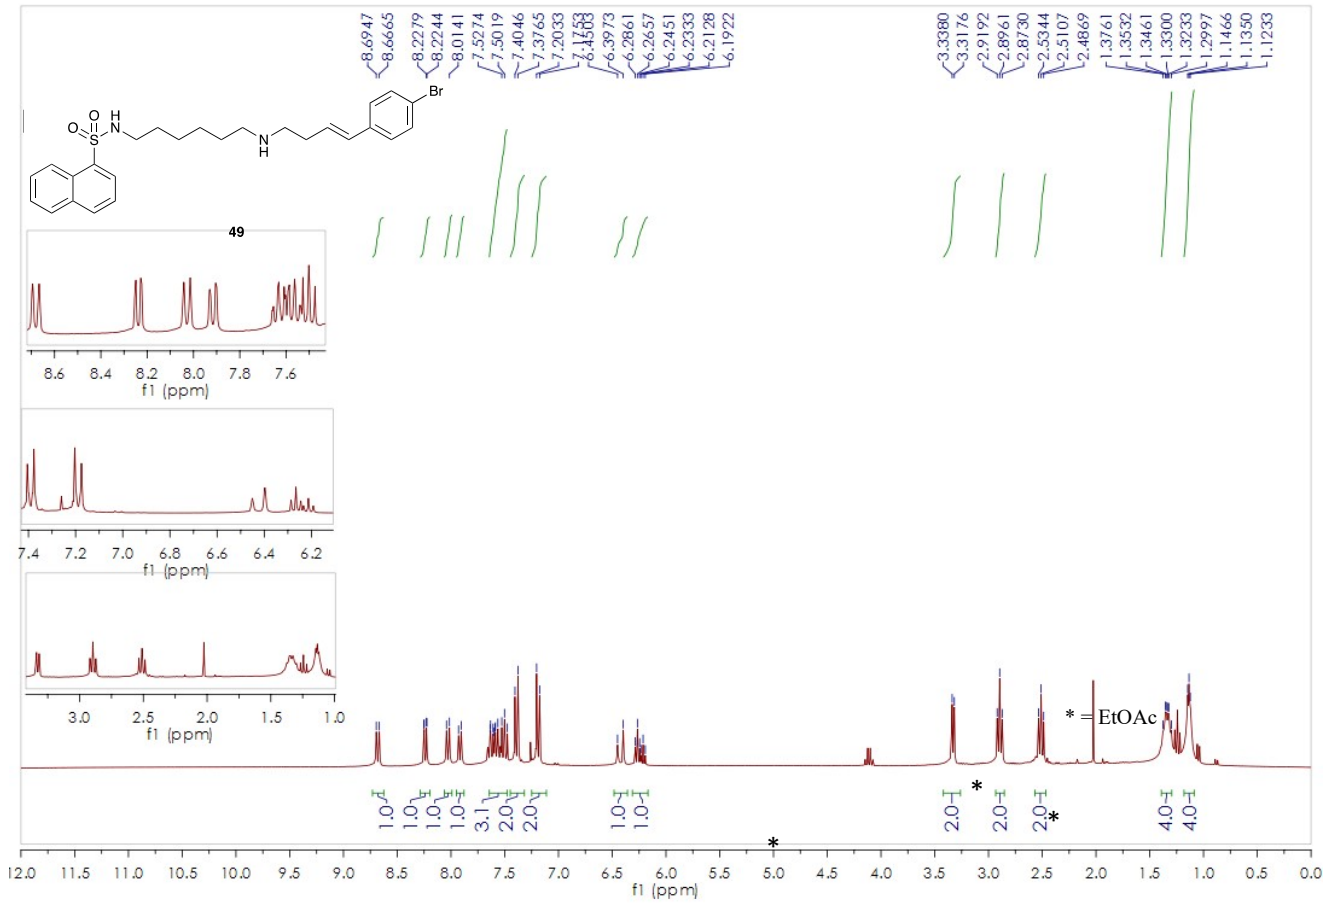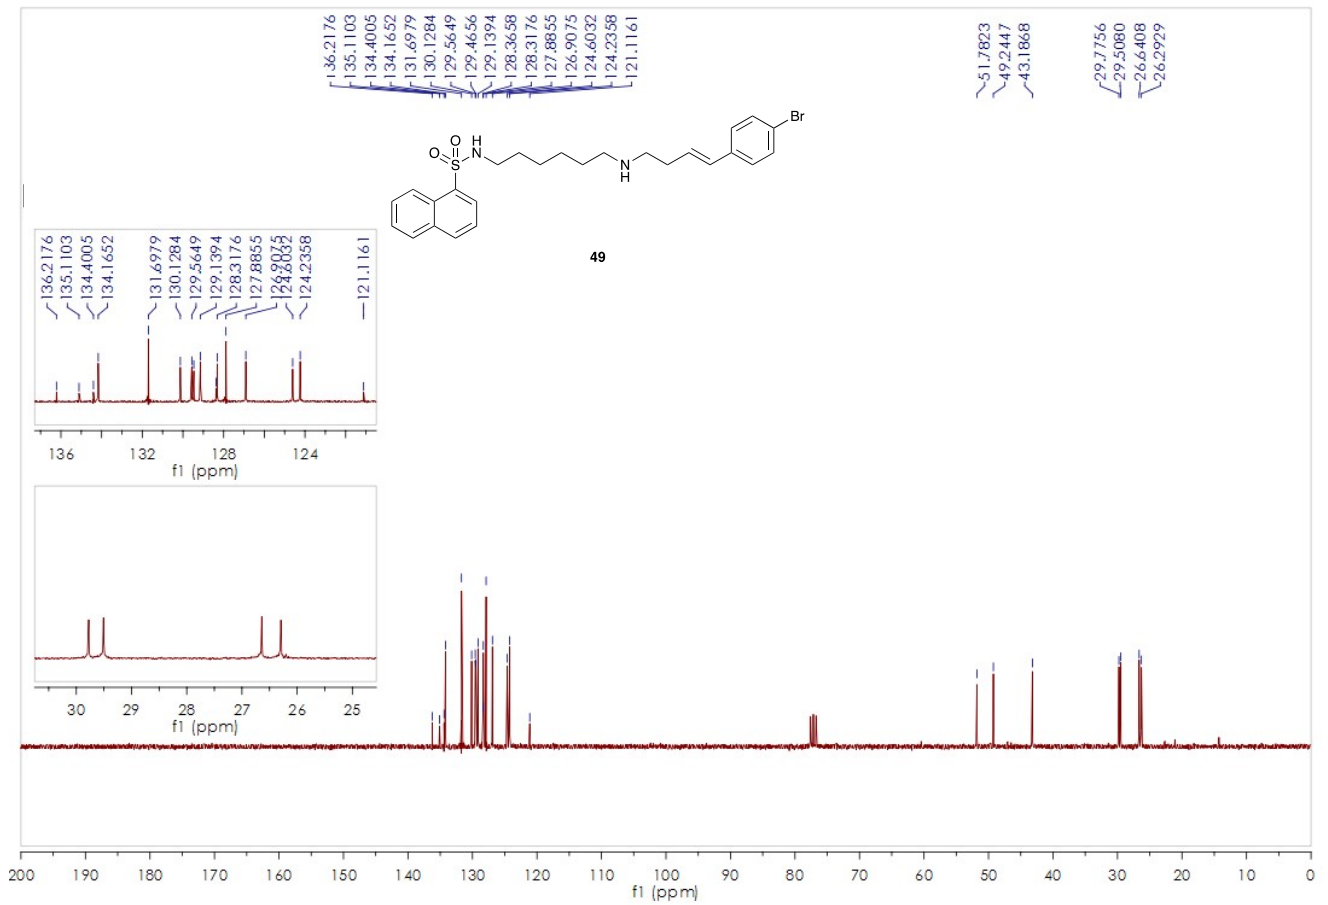



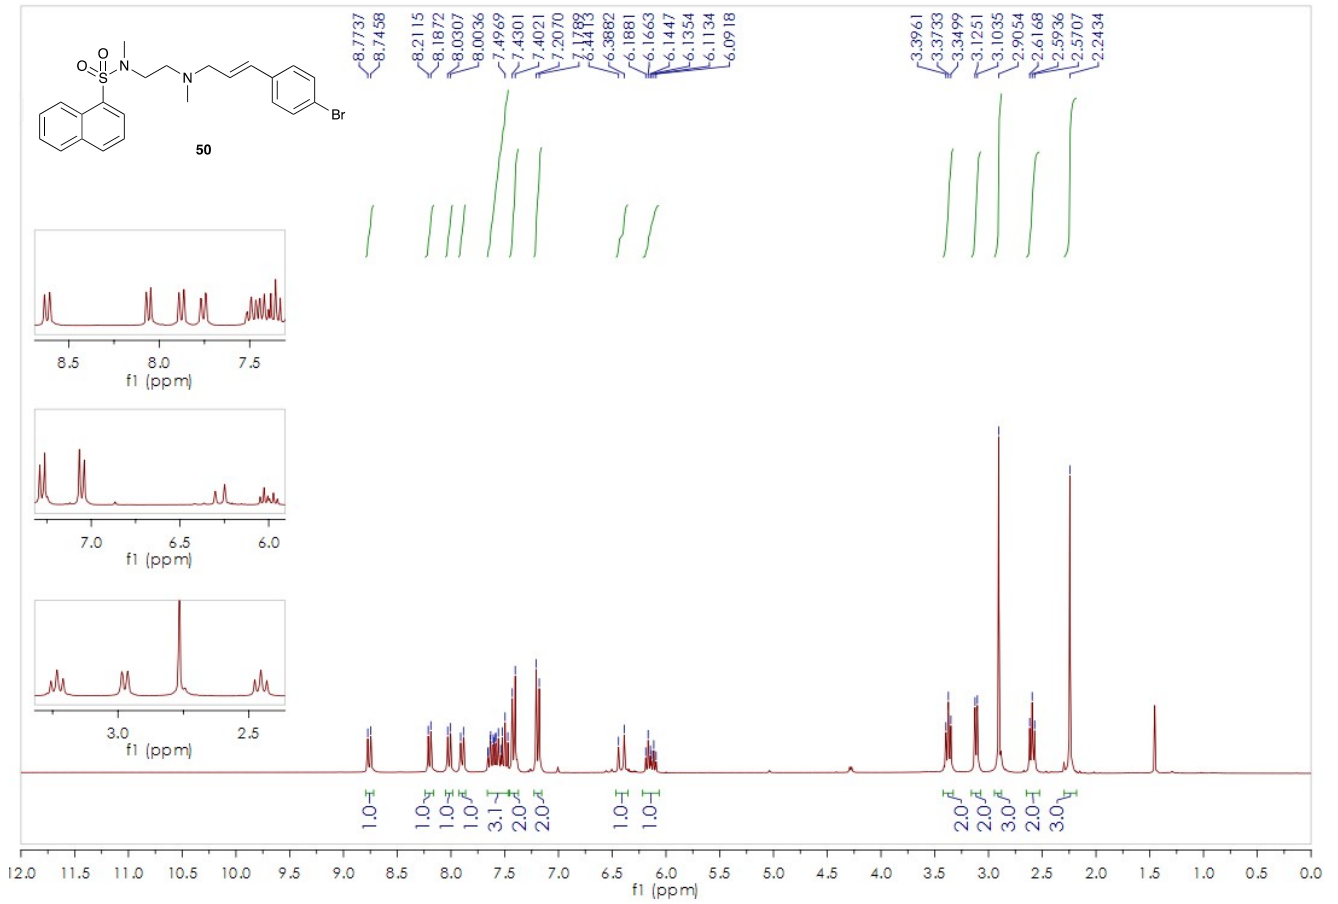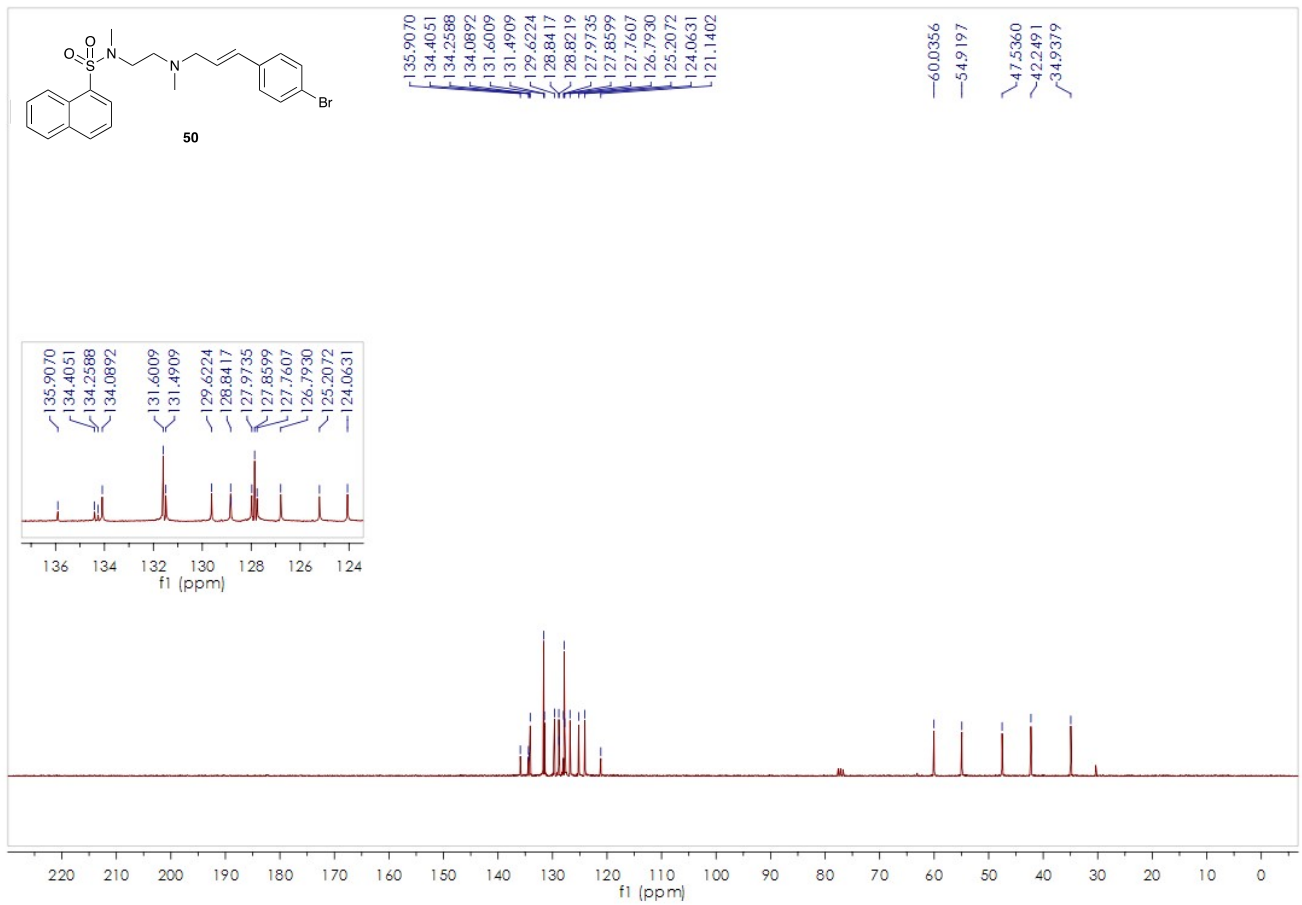



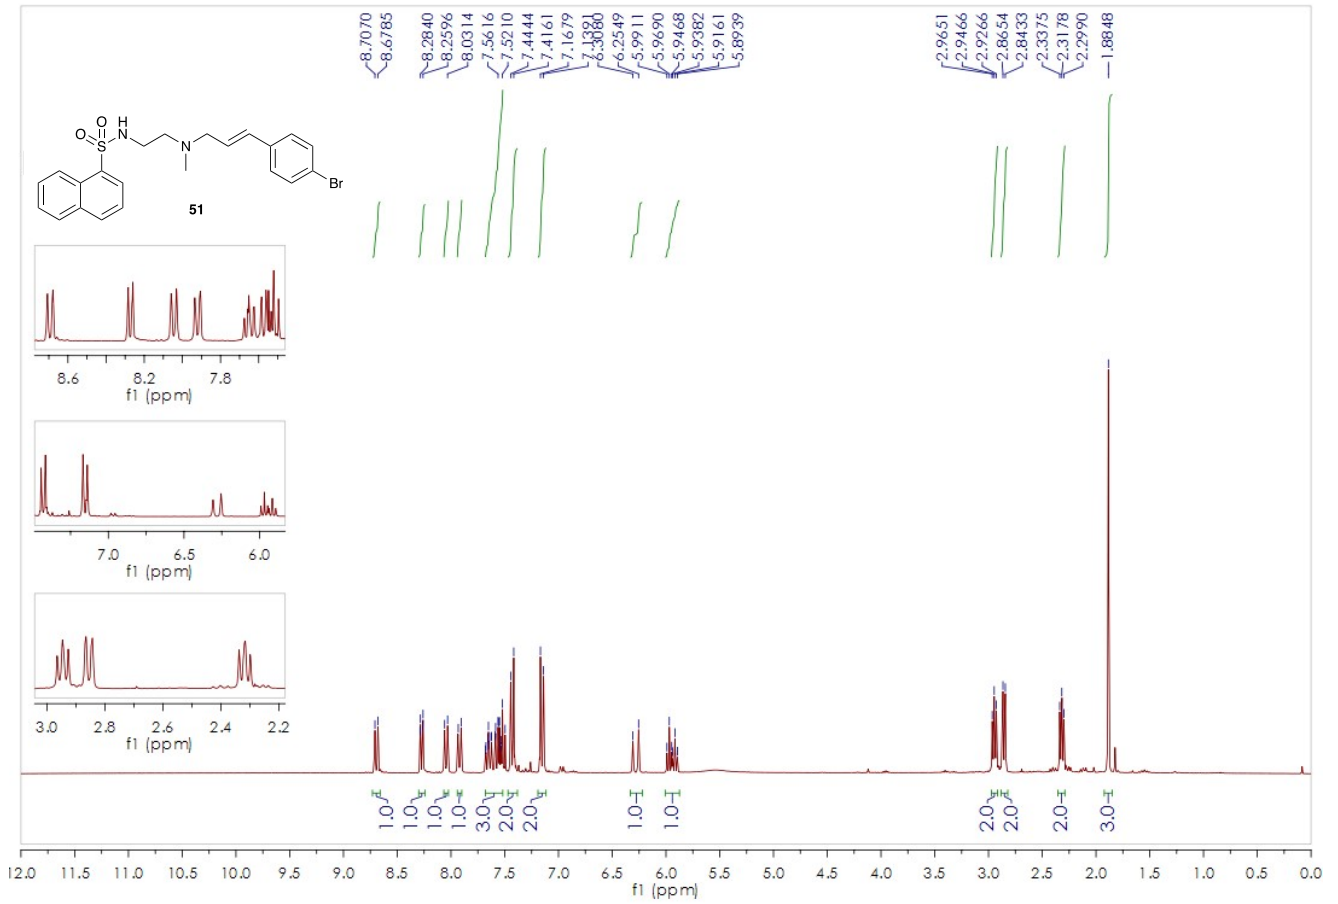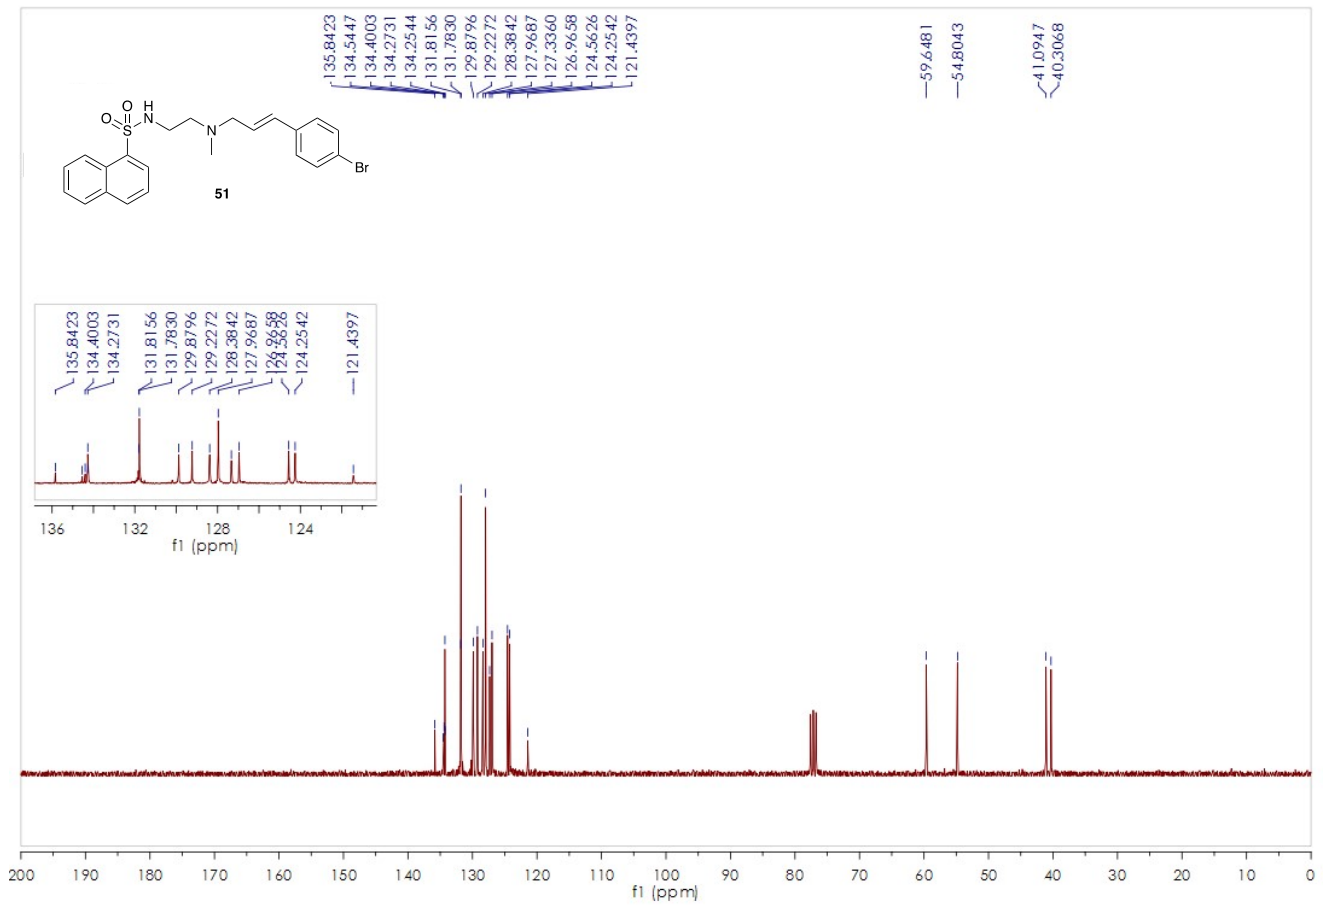

**Enlarged copies of: Figure 5.** Docked poses and molecular interaction descriptors as determined on docking of selected sulfonadyn analogues into the GTPase domain of dynl (pdb: 3ZYC) using the Molecular Operating Environment (MOE) software. **A** and **B**, dansyl cadaverine **1**; **C-D**, sulfonadyn-**19**; **E-F**, sulfonadyn-**33**; and **G-H**, sulfonadyn-**47**.

**A**

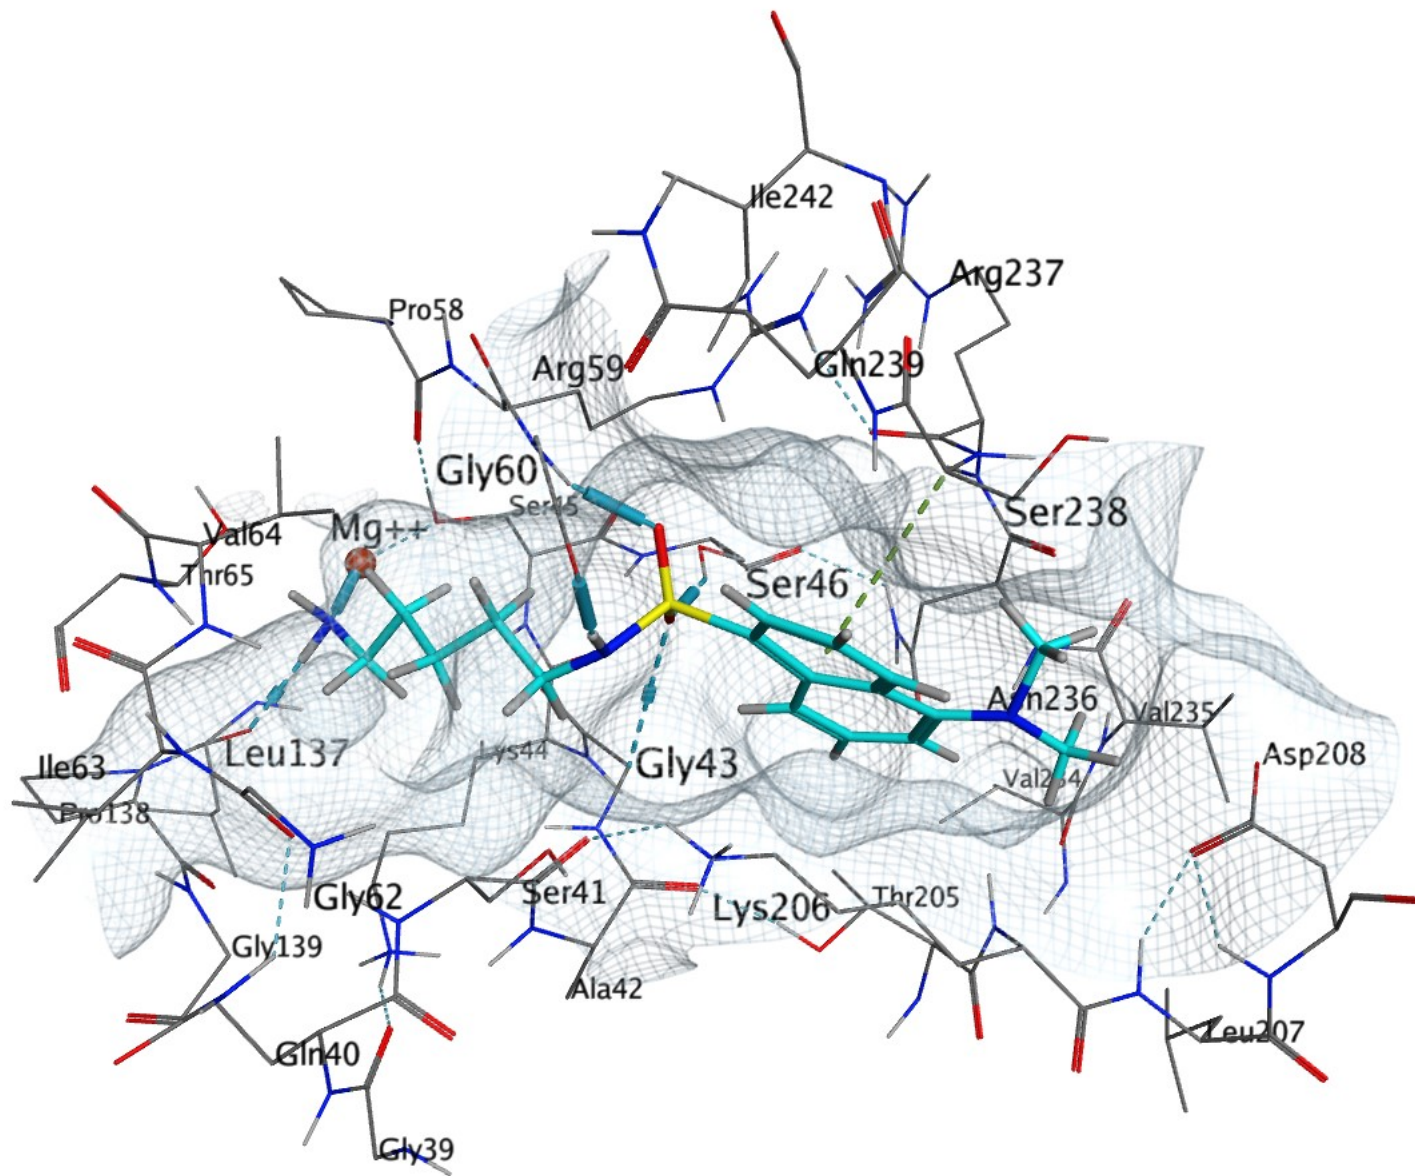

B

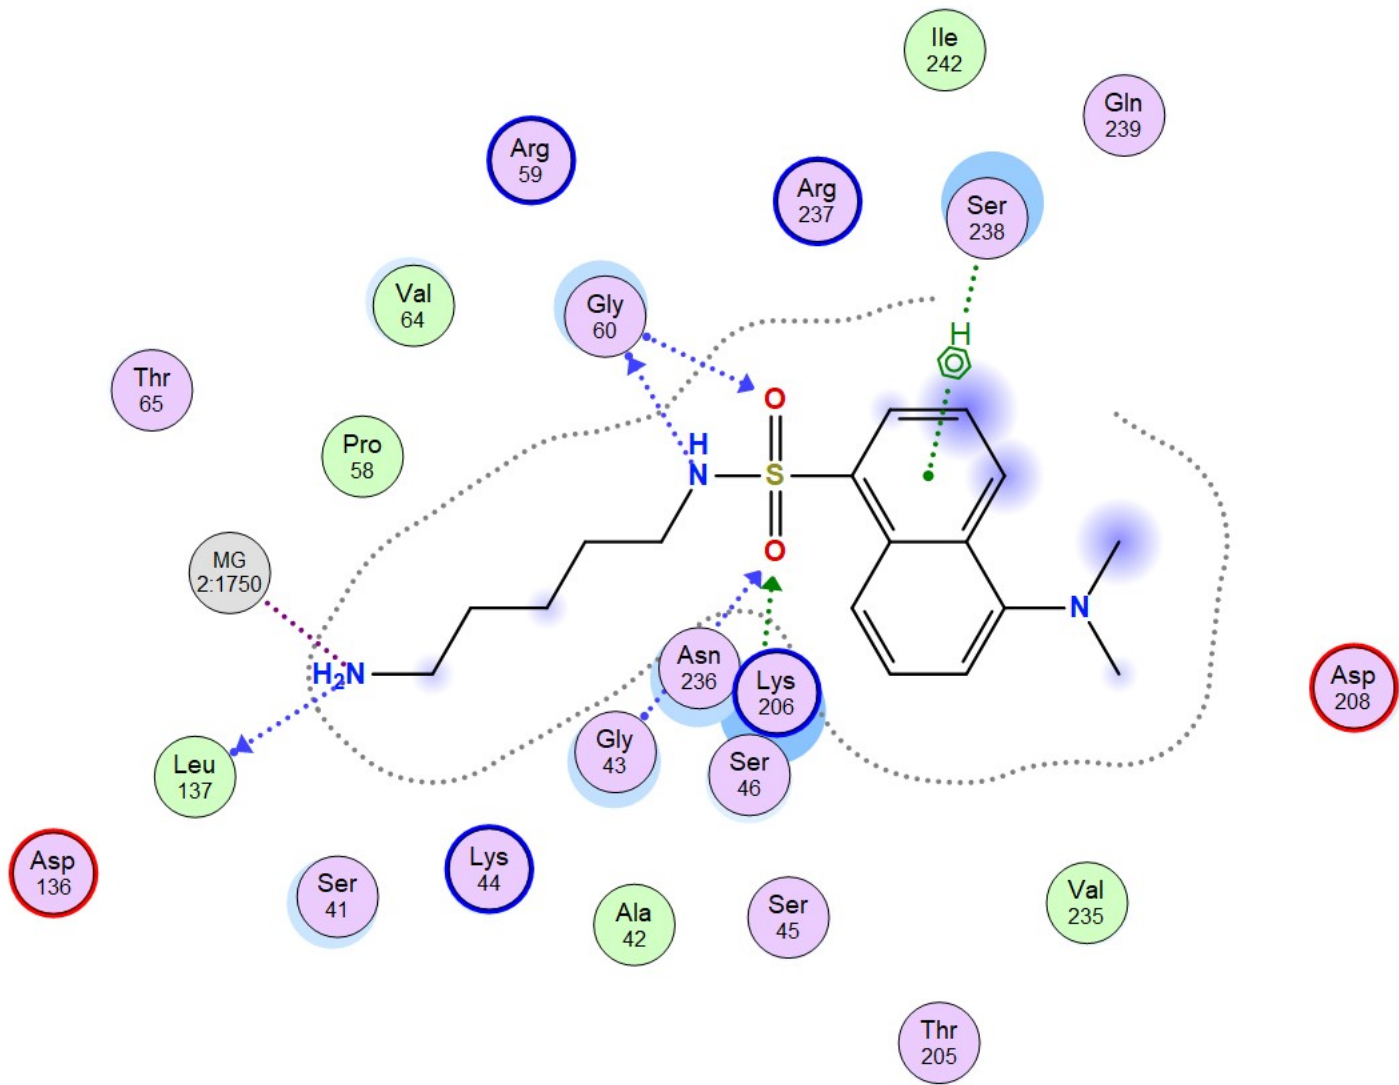

**C**



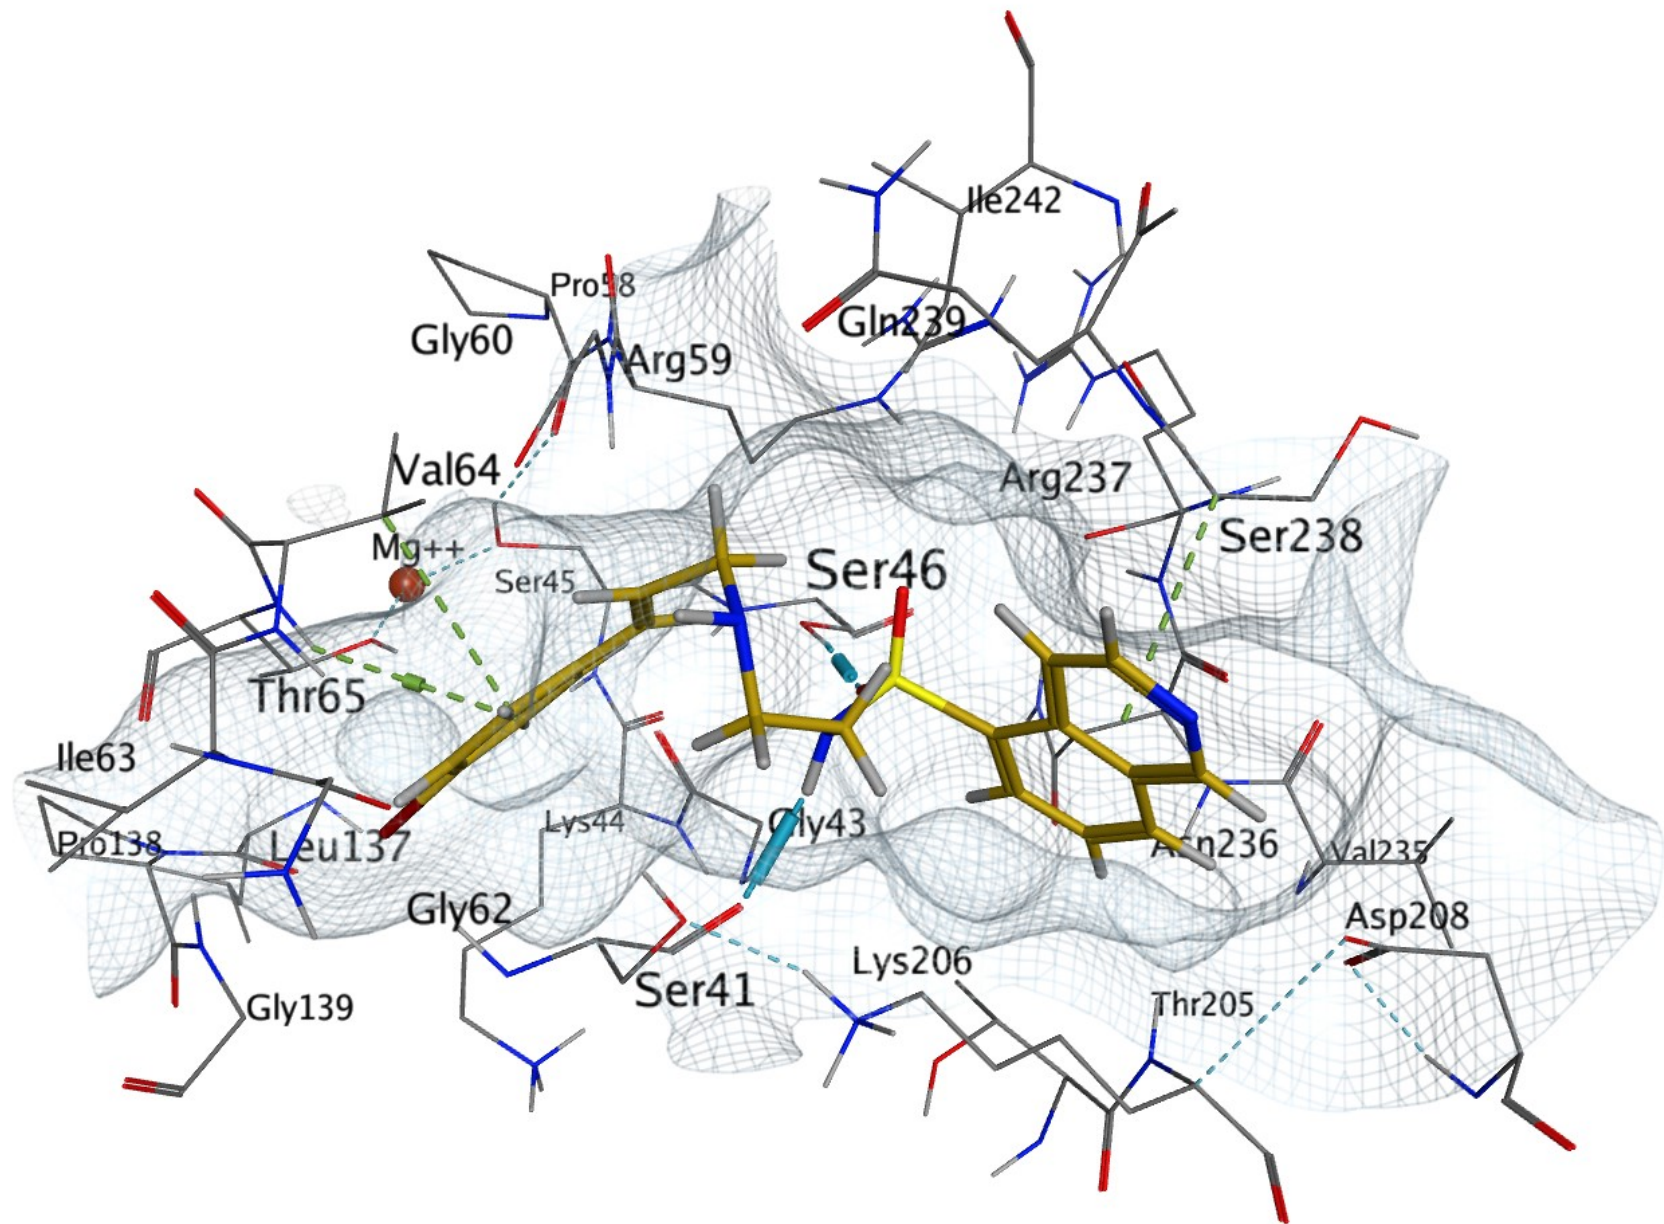

D

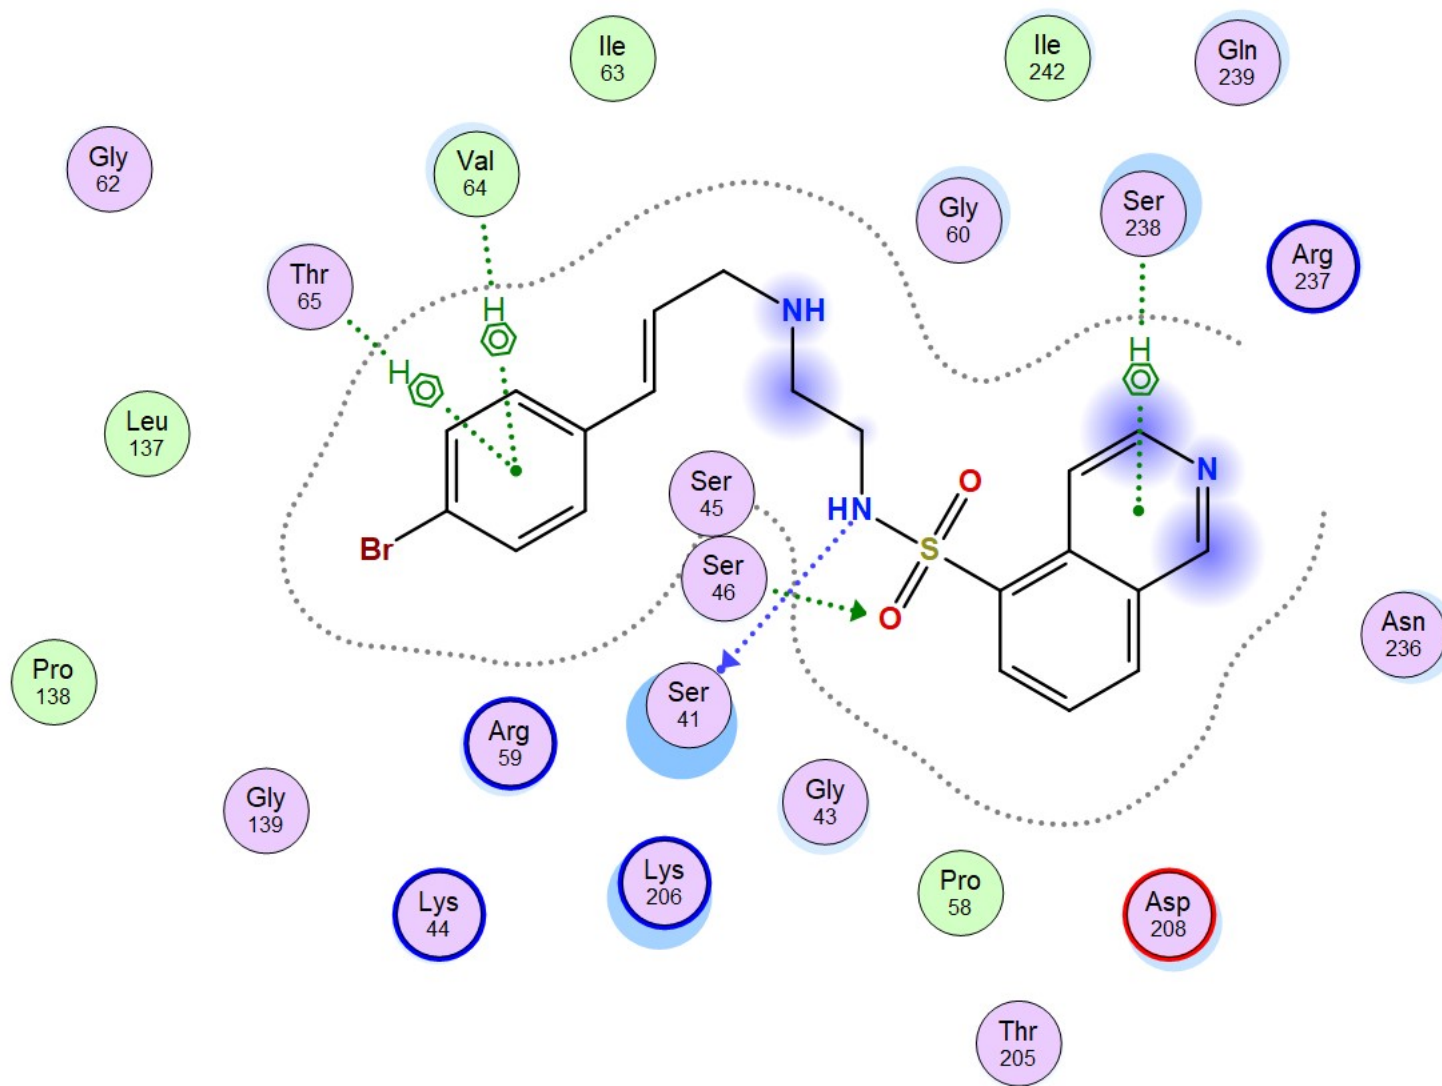

E

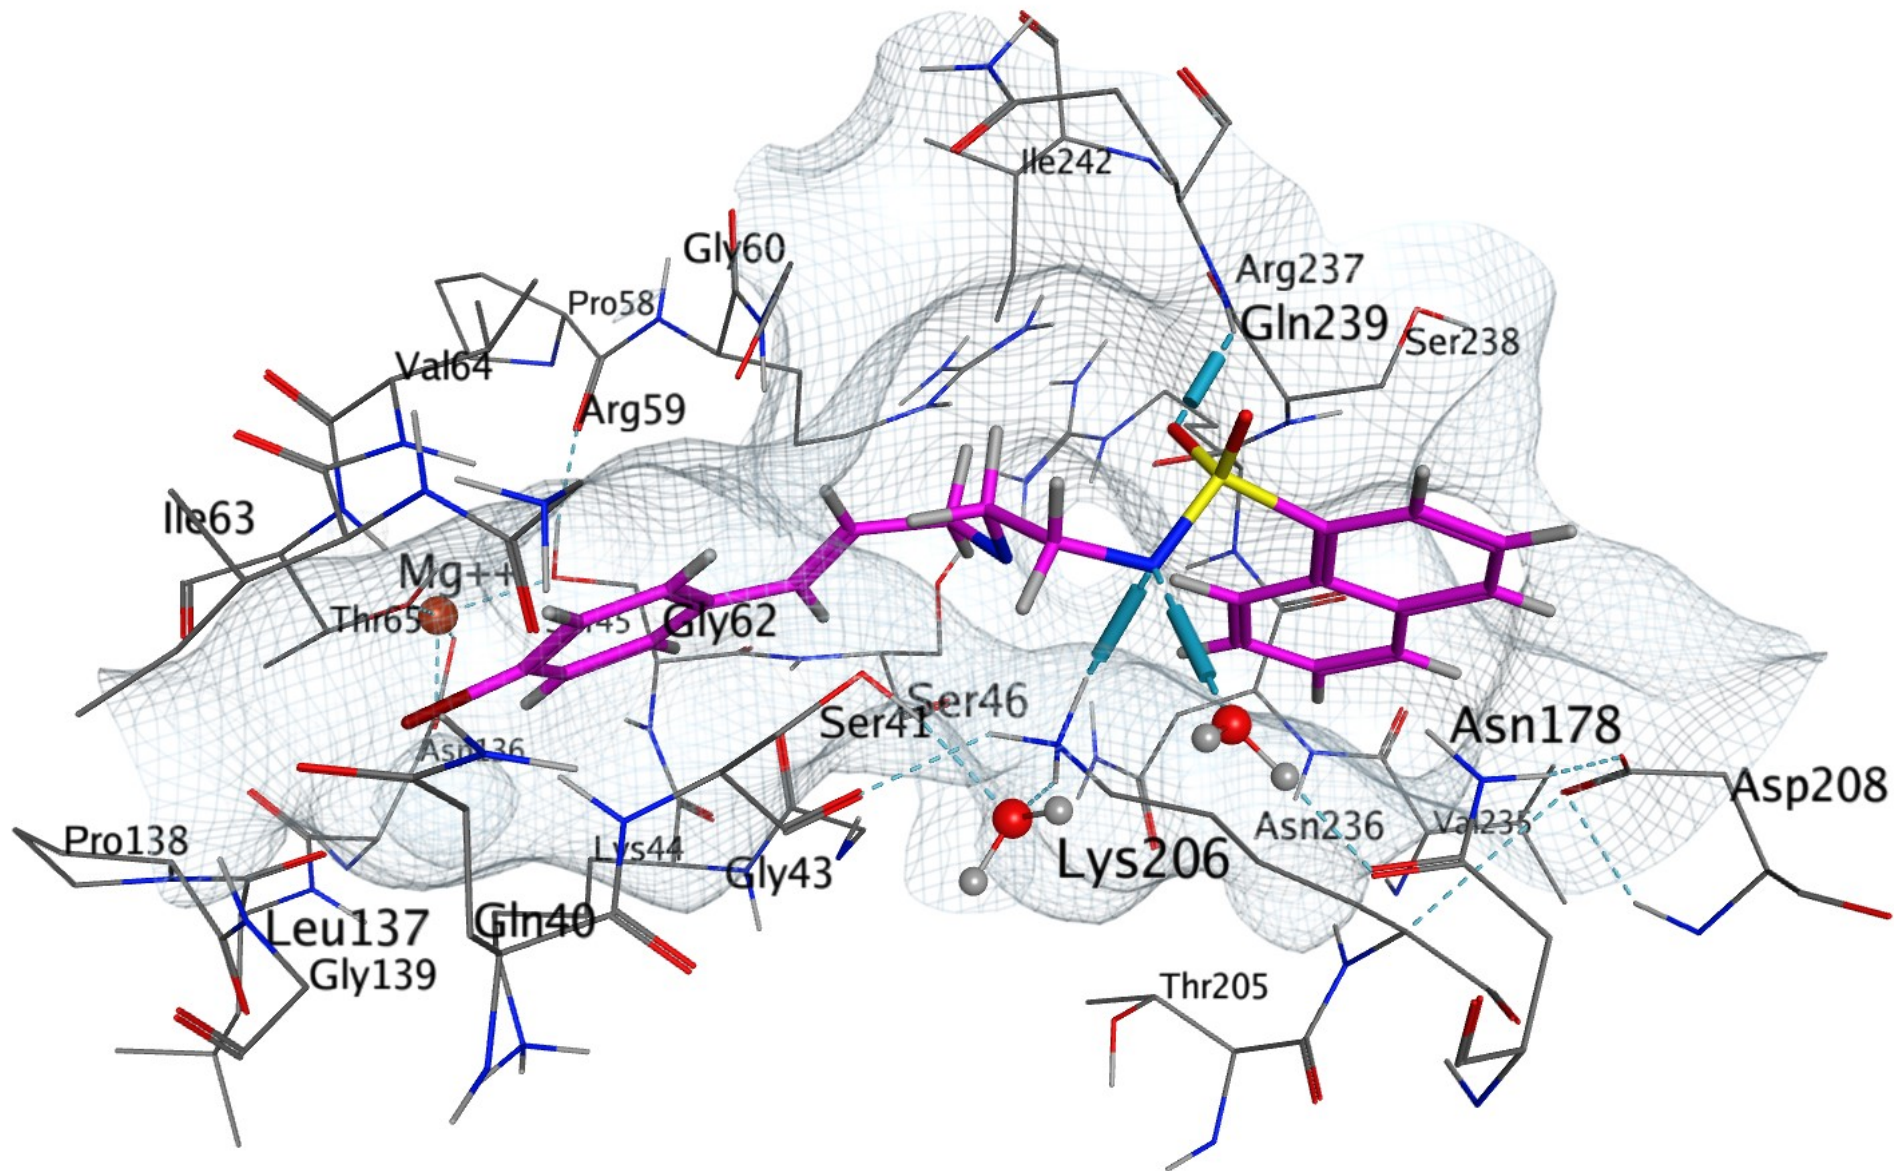



F

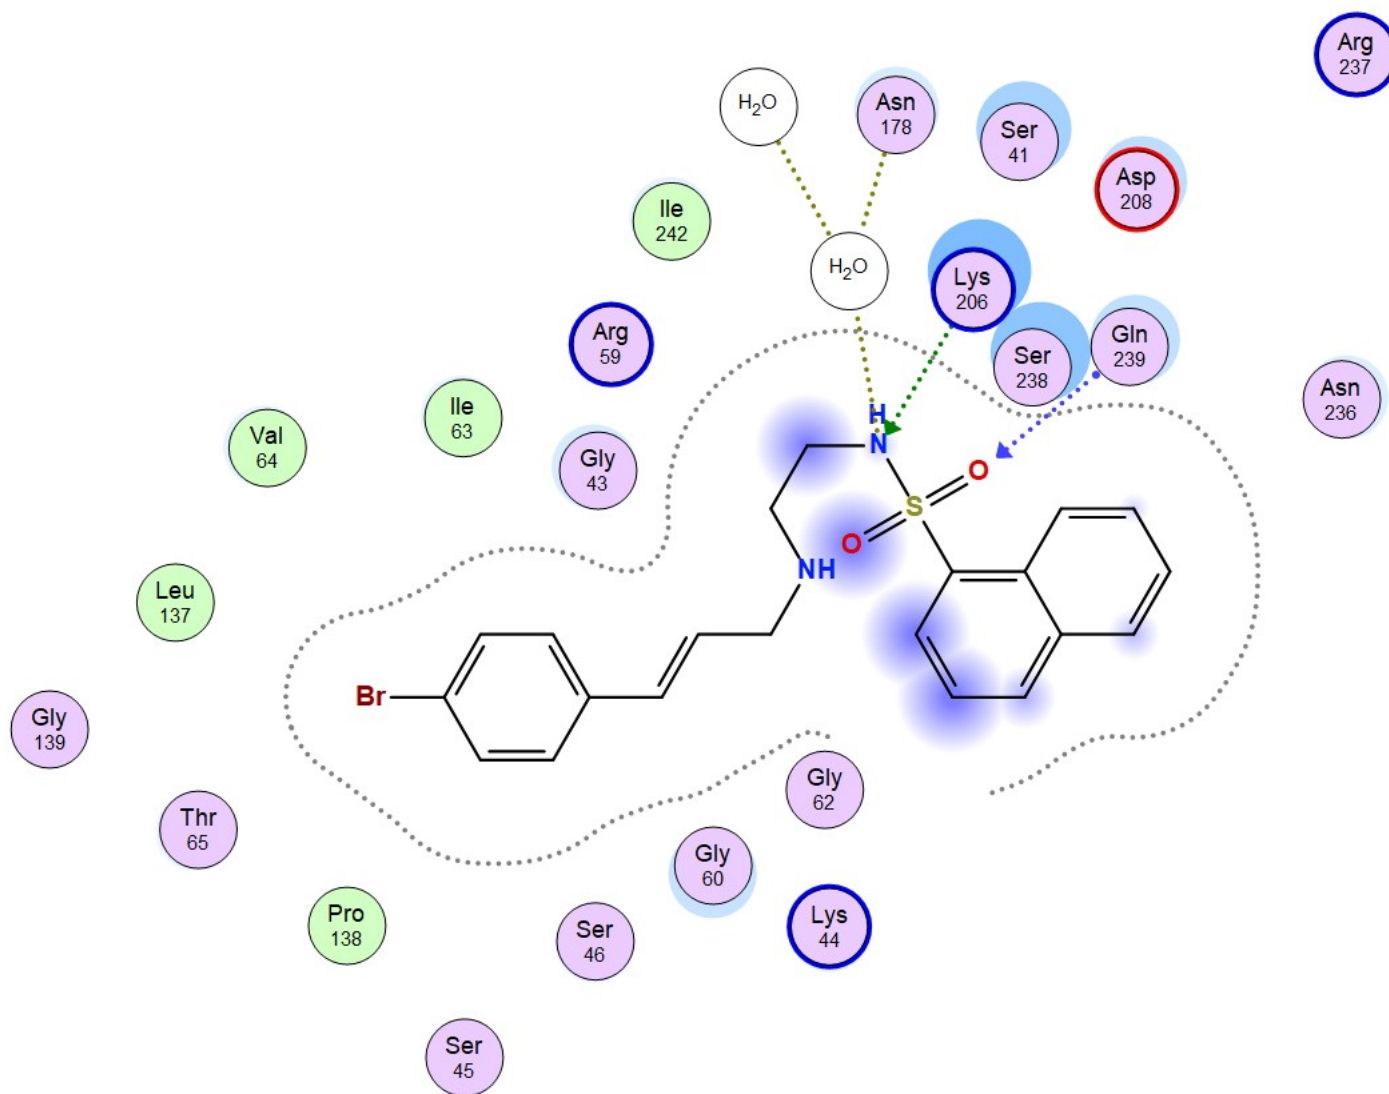

G

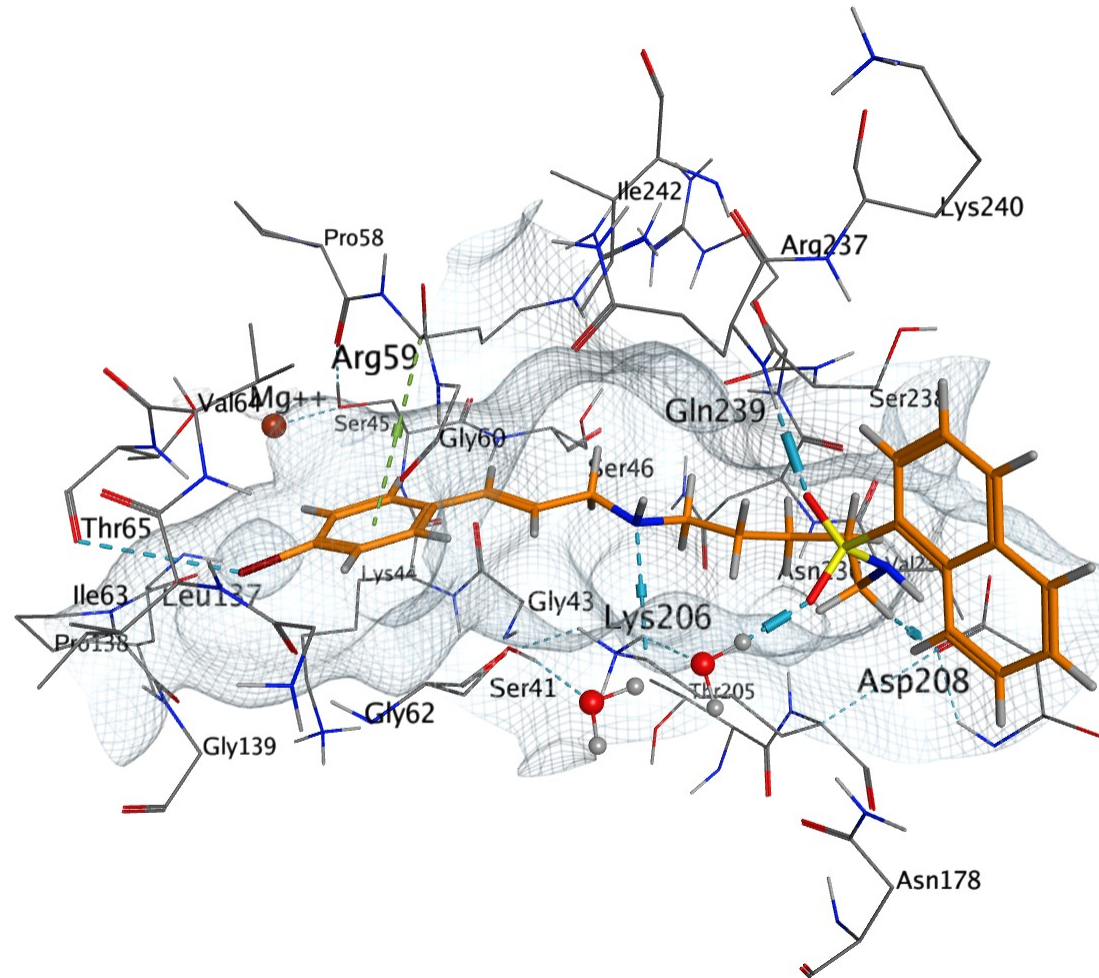

Supplement: MD-014-D2MD00371F-s001.pdf [file MD-014-D2MD00371F-s001.pdf]
